# Supplementary material for: Multi‐functional, Low Symmetry Pd2L4 Nanocage Libraries
Source: PubMed Central journal article supplement — Chemistry. 2021 Feb 1;27(13):4454–60. doi: 10.1002/chem.202005363 (PMC7986371; doi:10.1002/chem.202005363), 2021-02-01
Supplement: CHEM-27-4454-s001.pdf [file CHEM-27-4454-s001.pdf]

# Chemistry–A European Journal

Supporting Information

**Multi-functional, Low Symmetry Pd<sub>2</sub>L<sub>4</sub> Nanocage Libraries\*\***

James E. M. Lewis\*<sup>[a]</sup>

|                                                                                                                                                                                 |    |
|---------------------------------------------------------------------------------------------------------------------------------------------------------------------------------|----|
| General Experimental .....                                                                                                                                                      | 2  |
| Synthetic Procedures .....                                                                                                                                                      | 3  |
| General CuAAC Procedure .....                                                                                                                                                   | 3  |
| Synthesis of <b>S1</b> .....                                                                                                                                                    | 4  |
| Synthesis of <b>S2</b> .....                                                                                                                                                    | 6  |
| Synthesis of <b>1</b> .....                                                                                                                                                     | 9  |
| Synthesis of <b>L<sup>Bu</sup></b> .....                                                                                                                                        | 12 |
| Synthesis of <b>L<sup>Bn</sup></b> .....                                                                                                                                        | 15 |
| Synthesis of <b>L<sup>OH</sup></b> .....                                                                                                                                        | 18 |
| Synthesis of <b>L<sup>Phth</sup></b> .....                                                                                                                                      | 21 |
| Synthesis of <b>L<sup>Ene</sup></b> .....                                                                                                                                       | 24 |
| Synthesis of <b>L<sup>Anth</sup></b> .....                                                                                                                                      | 26 |
| [Pd <sub>2</sub> ( <b>L<sup>Bu</sup></b> ) <sub>4</sub> ](BF <sub>4</sub> ) <sub>4</sub> .....                                                                                  | 29 |
| [Pd <sub>2</sub> ( <b>L<sup>Bn</sup></b> ) <sub>4</sub> ](BF <sub>4</sub> ) <sub>4</sub> .....                                                                                  | 36 |
| [Pd <sub>2</sub> ( <b>L<sup>OH</sup></b> ) <sub>4</sub> ](BF <sub>4</sub> ) <sub>4</sub> .....                                                                                  | 42 |
| [Pd <sub>2</sub> ( <b>L<sup>Ene</sup></b> ) <sub>4</sub> ](BF <sub>4</sub> ) <sub>4</sub> .....                                                                                 | 48 |
| [Pd <sub>2</sub> ( <b>L<sup>Phth</sup></b> ) <sub>4</sub> ](BF <sub>4</sub> ) <sub>4</sub> .....                                                                                | 53 |
| [Pd <sub>2</sub> ( <b>L<sup>Anth</sup></b> ) <sub>4</sub> ](BF <sub>4</sub> ) <sub>4</sub> .....                                                                                | 58 |
| Comparison of <b>L<sup>Bu</sup></b> and <b>L<sup>Phth</sup></b> Self-assembly .....                                                                                             | 64 |
| <b>L<sup>Bu</sup></b> + 0.25 eq. Pd(II) .....                                                                                                                                   | 64 |
| <b>L<sup>Phth</sup></b> + 0.25 eq. Pd(II) .....                                                                                                                                 | 66 |
| Model Mononuclear Complexes .....                                                                                                                                               | 69 |
| [Pd( <b>1</b> ) <sub>4</sub> ](BF <sub>4</sub> ) <sub>2</sub> .....                                                                                                             | 69 |
| [Pd( <b>S2</b> ) <sub>4</sub> ](BF <sub>4</sub> ) <sub>2</sub> .....                                                                                                            | 69 |
| Combinatorial Libraries .....                                                                                                                                                   | 70 |
| [Pd <sub>2</sub> ( <b>L<sup>Bu</sup></b> ) <sub>x</sub> ( <b>L<sup>Bn</sup></b> ) <sub>(4-x)</sub> ](BF <sub>4</sub> ) <sub>4</sub> .....                                       | 70 |
| [Pd <sub>2</sub> ( <b>L<sup>Bu</sup></b> ) <sub>x</sub> ( <b>L<sup>Phth</sup></b> ) <sub>(4-x)</sub> ](BF <sub>4</sub> ) <sub>4</sub> .....                                     | 72 |
| [Pd <sub>2</sub> ( <b>L<sup>OH</sup></b> ) <sub>x</sub> ( <b>L<sup>Ene</sup></b> ) <sub>y</sub> ( <b>L<sup>Anth</sup></b> ) <sub>z</sub> ](BF <sub>4</sub> ) <sub>4</sub> ..... | 74 |
| Geometry Optimised Structures .....                                                                                                                                             | 77 |
| Solvodynamic Radii Calculations .....                                                                                                                                           | 79 |
| Proton Affinity Calculations .....                                                                                                                                              | 80 |
| X-ray Crystallography .....                                                                                                                                                     | 82 |
| References .....                                                                                                                                                                | 86 |

## General Experimental

**Synthesis:** Unless otherwise stated, all reagents, including anhydrous solvents, were purchased from commercial sources and used without further purification.  $\text{CDCl}_3$  and  $\text{NEt}_3$  were stored over 4 Å molecular sieves prior to use. All reactions were carried out under air using reagent grade solvents unless otherwise stated. Reactions carried out under an atmosphere of  $\text{N}_2$  used degassed solvents. Analytical TLC was performed on pre-coated silica gel plates (0.25 mm thick, 60F254, Merck, Germany) and observed under UV light. EDTA solution refers to a 0.1 M solution of EDTA- $\text{Na}_2$  in 3%  $\text{NH}_{3(\text{aq})}$ .

**Analysis:** NMR spectra were recorded on Bruker AV400 or AV500 instrument, at a constant temperature of 300 K. Chemical shifts are reported in parts per million from low to high field and referenced to residual solvent. Standard abbreviations indicating multiplicity were used as follows: m = multiplet, quint = quintet, q = quartet, t = triplet, d = doublet, s = singlet, app. = apparent, br. = broad. Signal assignment was carried out using 2D NMR methods (HSQC, HMBC, COSY, NOESY) where necessary. In the case of some signals absolute assignment was not possible. Here indicative either/or assignments (e.g.  $\text{H}_A/\text{H}_B$  for  $\text{H}_A$  or  $\text{H}_B$ ) are provided. All melting points were determined using a hot stage apparatus and are uncorrected. Mass spectrometry was carried out by the Imperial College London, Department of Chemistry Mass Spectroscopy Service using Waters LCT Premier for HR-ESI-MS.

## Synthetic Procedures

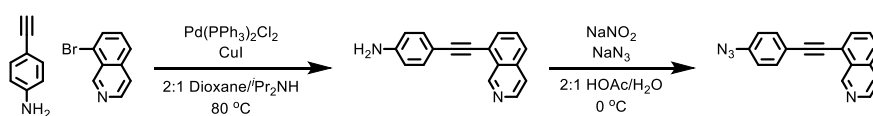

## General CuAAC Procedure

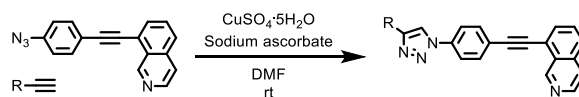

**1** (67.6 mg, 0.25 mmol, 1.0 eq), CuSO<sub>4</sub>·5H<sub>2</sub>O (31.2 mg, 0.125 mmol, 0.5 eq.), sodium ascorbate (49.5 mg, 0.25 mmol, 1.0 eq) and alkyne were stirred at rt in DMF (5 mL) for 16 h. EtOAc (40 mL) was added and washed with EDTA solution (10 mL), brine (4 × 10 mL), dried (MgSO<sub>4</sub>), and the solvent removed *in vacuo* to give the crude product which was purified by column chromatography on silica gel.

## Synthesis of S1

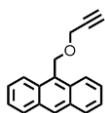

9-Hydroxymethylanthracene (0.417 g, 2 mmol, 1 eq.) was added as a solid to NaH (60% dispersion in mineral oil, 0.200 g, 5 mmol, 2.5 eq.) in DMF (4 mL) at 0 °C under N<sub>2</sub>. Propargyl bromide (80 wt. % in toluene, 0.33 mL, 3 mmol, 1.5 eq.) was subsequently added via syringe and the reaction stirred, allowing to warm to rt, for 19 h. H<sub>2</sub>O (50 mL) was added and the resultant precipitate isolated by filtration on paper, washed copiously with H<sub>2</sub>O, dissolved in CH<sub>2</sub>Cl<sub>2</sub>, dried (MgSO<sub>4</sub>) and the solvent removed *in vacuo*. Purification by column chromatography on silica (1:1 pentane/CH<sub>2</sub>Cl<sub>2</sub>) gave the product as a yellow solid (0.429 g, 87%). Spectra were consistent with those previously reported.<sup>[1]</sup> <sup>1</sup>H NMR (400 MHz, CDCl<sub>3</sub>) δ: 8.49 (s, 1H), 8.45 (dd, *J* = 8.9, 1.0 Hz, 2H), 8.02 (app. dt, *J* = 8.4, 0.7 Hz, 2H), 7.57 (ddd, *J* = 8.9, 6.5, 1.4 Hz, 2H), 7.49 (ddd, *J* = 8.5, 6.5, 1.1 Hz, 2H), 5.62 (s, 2H), 4.33 (d, *J* = 2.4 Hz, 2H), 2.63 (t, *J* = 2.4 Hz, 1H). <sup>13</sup>C NMR (101 MHz, CDCl<sub>3</sub>) δ: 131.5, 131.3, 129.1, 128.9, 127.9, 126.5, 125.1, 124.3, 80.3, 75.1, 63.7, 57.6.

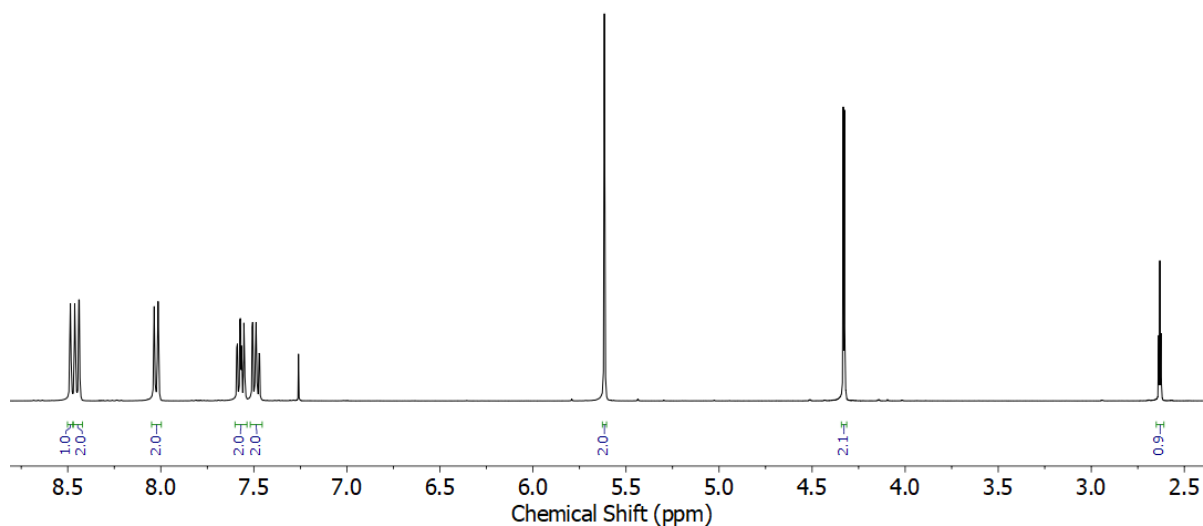

Figure S1 <sup>1</sup>H NMR (CDCl<sub>3</sub>, 400 MHz) of S1.

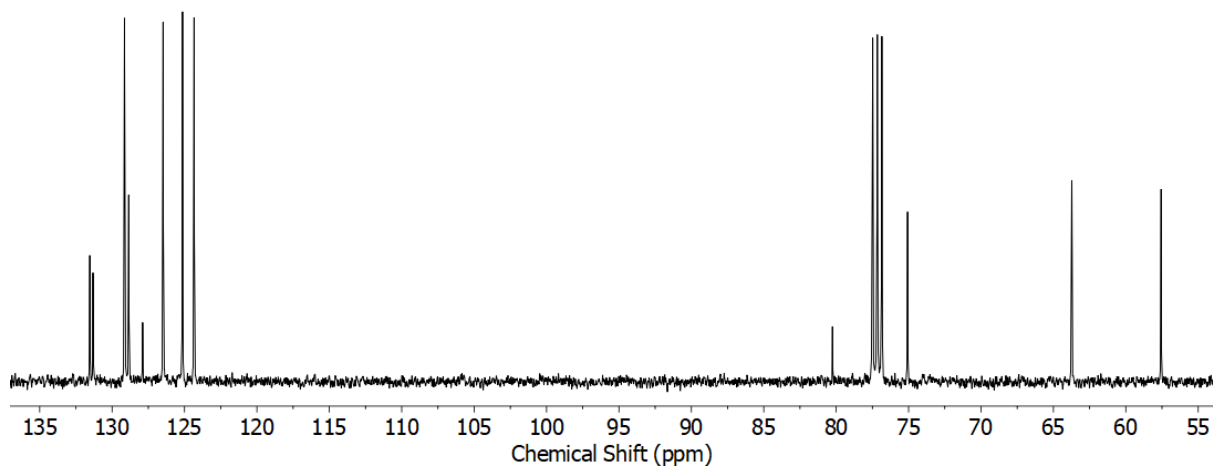

Figure S2  $^{13}\text{C}$  NMR ( $\text{CDCl}_3$ , 101 MHz) of S1.

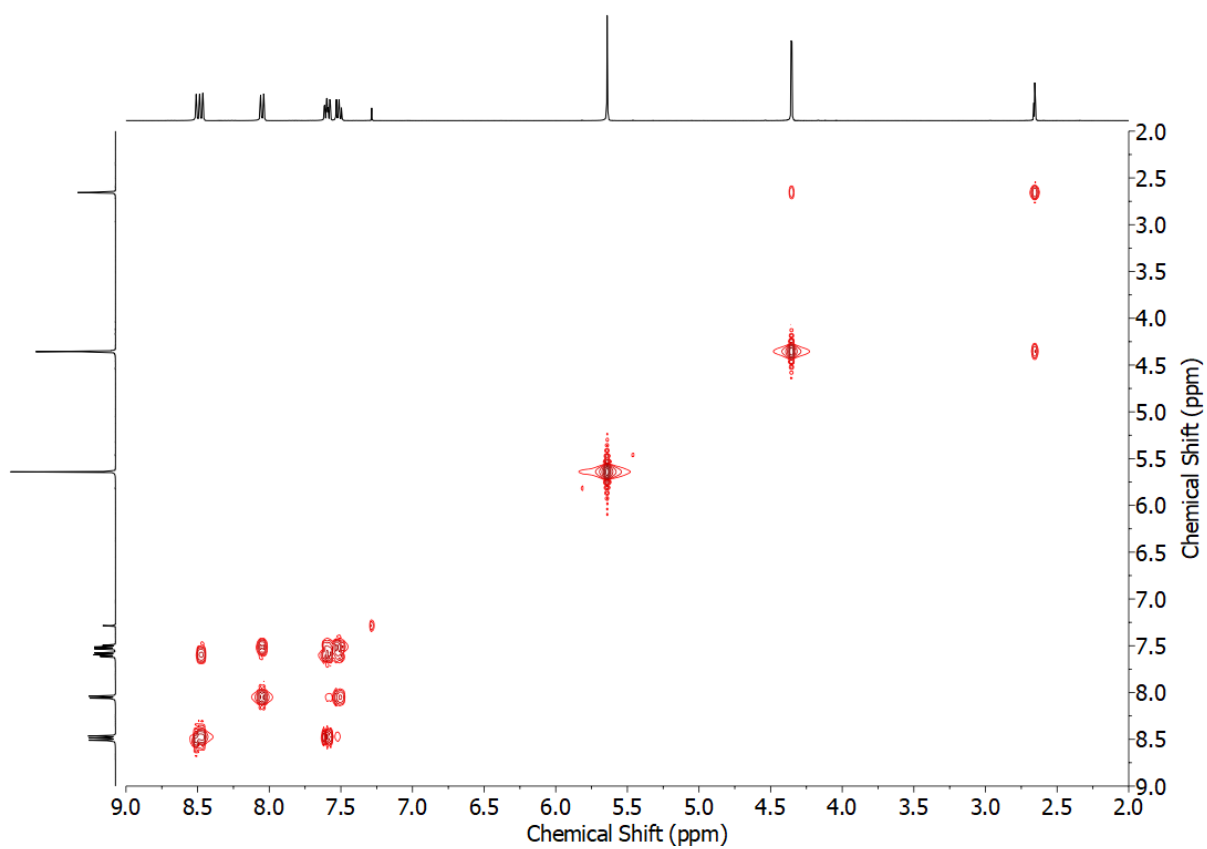

Figure S3 COSY NMR ( $\text{CDCl}_3$ ) of S1.

## Synthesis of S2

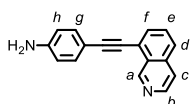

8-Bromoisquinoline (0.626 g, 3.0 mmol, 1.0 eq.), 4-ethynylaniline (0.387 g, 3.3 mmol, 1.1 eq.), Pd(PPh<sub>3</sub>)<sub>2</sub>Cl<sub>2</sub> (0.053 g, 0.075 mmol, 2.5 mol%) and CuI (0.029 g, 0.150 mmol, 5 mol%) were stirred at 80 °C in 2:1 dioxane/*i*Pr<sub>2</sub>NH (18 mL) under N<sub>2</sub> in a sealed vial for 16 h. After the solvent was removed *in vacuo*, the residue was dissolved in CH<sub>2</sub>Cl<sub>2</sub> (50 mL) and washed with EDTA solution (20 mL). The aqueous phase was extracted with CH<sub>2</sub>Cl<sub>2</sub> and the combined organic phases dried (MgSO<sub>4</sub>) and the solvent removed *in vacuo*. After purification by column chromatography on silica (acetone/CH<sub>2</sub>Cl<sub>2</sub> step gradient 0:100 → 5:95 → 10:90 → 15:85) the product was obtained as a bright yellow solid (0.659 g, 90%). R<sub>f</sub> = 0.30 (1:9 acetone/CH<sub>2</sub>Cl<sub>2</sub>). M.p. 169-171 °C. <sup>1</sup>H NMR (400 MHz, CDCl<sub>3</sub>) δ: 9.82 (s, 1H, H<sub>a</sub>), 8.58 (d, *J* = 5.7 Hz, 1H, H<sub>b</sub>), 7.77-7.74 (m, 2H, H<sub>f</sub>, H<sub>d</sub>/H<sub>e</sub>), 7.66-7.62 (m, 2H, H<sub>c</sub>, H<sub>d</sub>/H<sub>e</sub>), 7.46 (d, *J* = 8.6 Hz, 2H, H<sub>g</sub>), 6.69 (d, *J* = 8.6 Hz, 2H, H<sub>h</sub>), 3.90 (br. s, 2H, H<sub>NH</sub>). <sup>13</sup>C NMR (101 MHz, CDCl<sub>3</sub>) δ: 151.6, 147.4, 143.8, 136.0, 133.4, 130.9, 130.0, 128.1, 126.3, 122.6, 120.6, 115.0, 112.1, 97.1, 83.9. HR-ESI-MS *m/z* = 245.1067 [M+H]<sup>+</sup> calc. 245.1073.

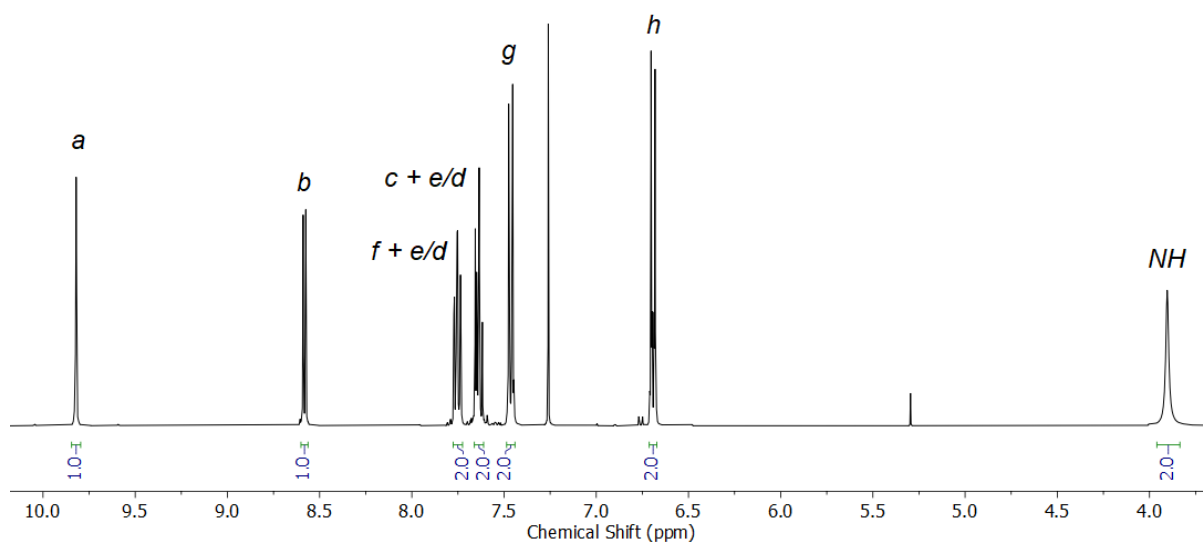

Figure S4 <sup>1</sup>H NMR (CDCl<sub>3</sub>, 400 MHz) of S2.

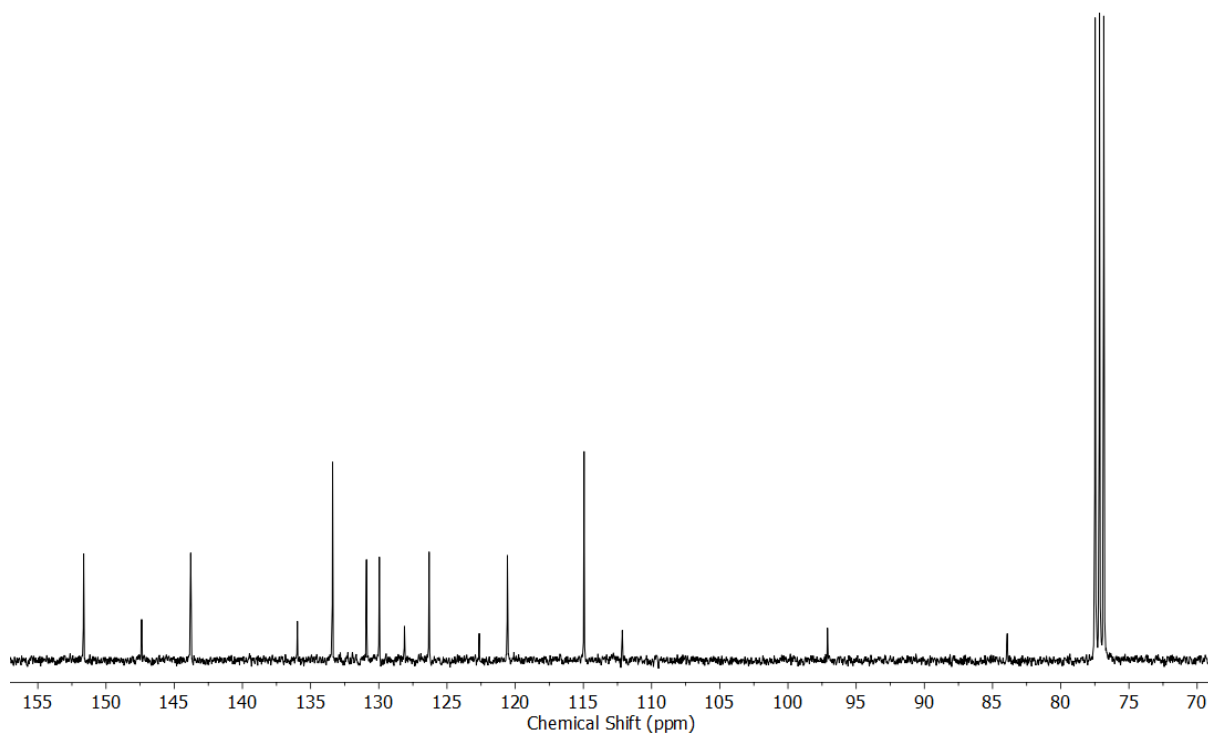

Figure S5  $^{13}\text{C}$  NMR ( $\text{CDCl}_3$ , 101 MHz) of S2.

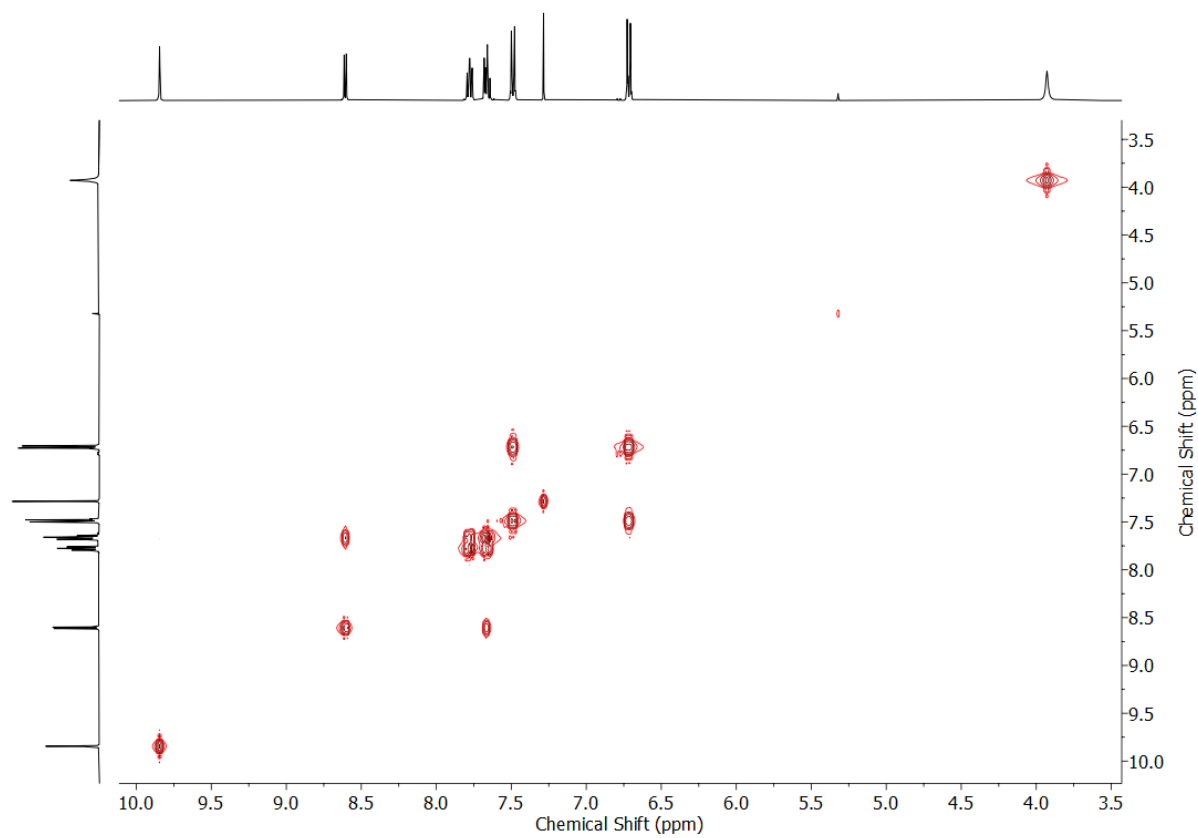

Figure S6 COSY NMR ( $\text{CDCl}_3$ ) of S2.



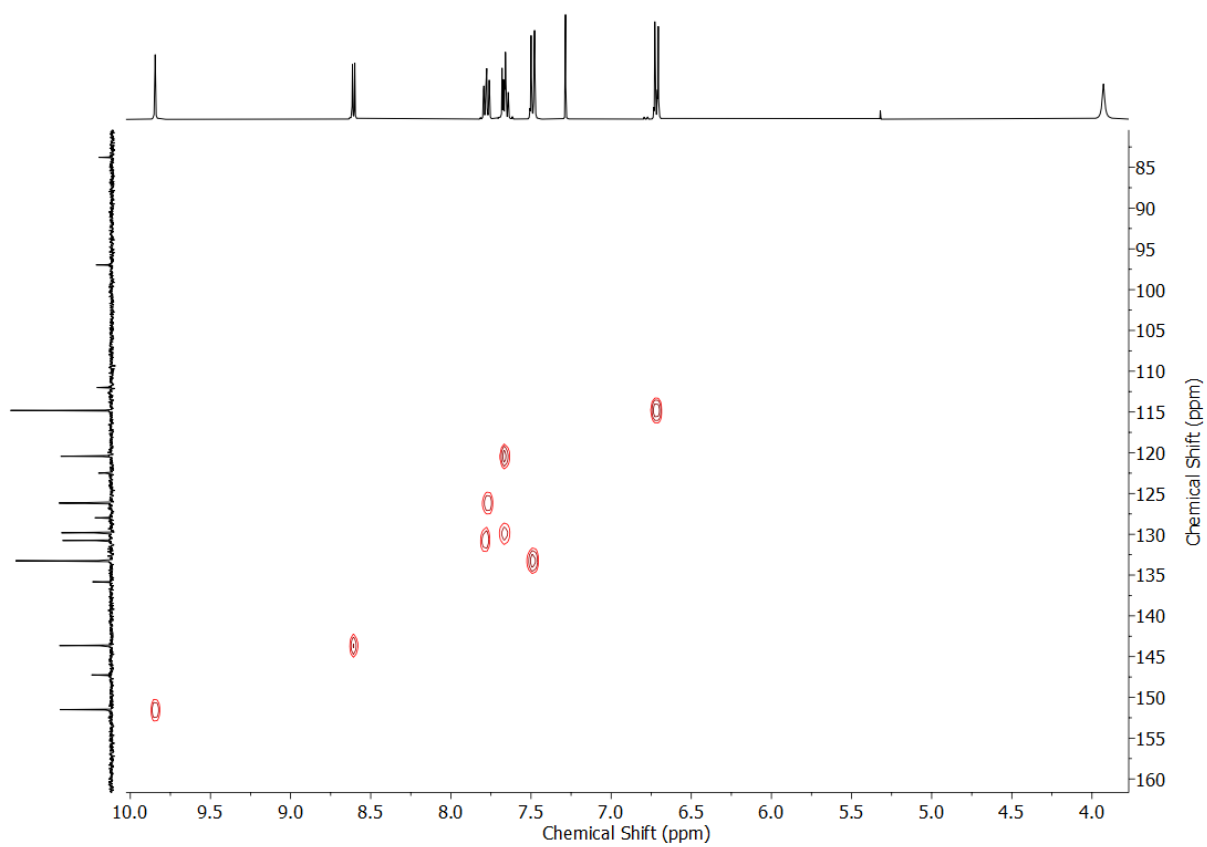

Figure S7 HSQC NMR ( $\text{CDCl}_3$ ) of S2.

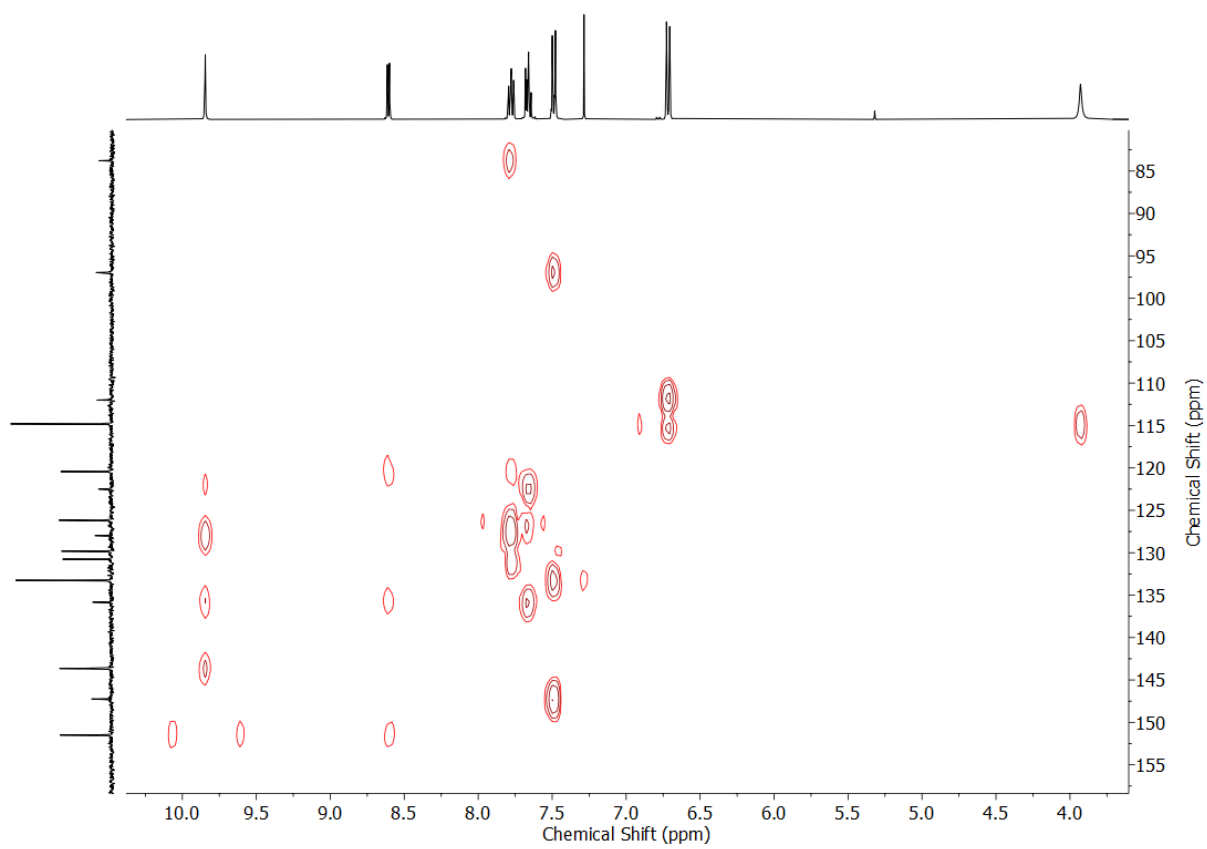

Figure S8 HMBC NMR ( $\text{CDCl}_3$ ) of S2.

## Synthesis of 1

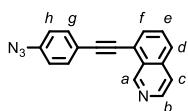

To a stirring solution of **S2** (0.392 g, 1.60 mmol, 1.0 eq.) in 2:1 AcOH/H<sub>2</sub>O (6 mL) at 0 °C was added NaNO<sub>2</sub> (0.155 g, 2.25 mmol, 1.4 eq.). After 2 h, NaN<sub>3</sub> (0.312 g, 4.8 mmol, 3.0 eq.) was added portionwise and the reaction allowed to warm to rt. After 30 min, sat. aq. NaHCO<sub>3</sub> (80 mL) was added carefully and the aqueous phase extracted with CH<sub>2</sub>Cl<sub>2</sub> (4 × 25 mL). The combined organic extracts were dried (MgSO<sub>4</sub>) and the solvent removed *in vacuo* to give the product as a dark orange solid (0.412 g, 95%). M.p. 92-94 °C. <sup>1</sup>H NMR (400 MHz, CDCl<sub>3</sub>) δ: 9.80 (s, 1H, H<sub>a</sub>), 8.61 (d, *J* = 5.7 Hz, 1H, H<sub>b</sub>), 7.81-7.79 (m, 2H, H<sub>f</sub>, H<sub>d</sub>/H<sub>e</sub>), 7.68-7.65 (m, 2H, H<sub>c</sub>, H<sub>d</sub>/H<sub>e</sub>), 7.64 (d, *J* = 8.6 Hz, 2H, H<sub>g</sub>), 7.07 (d, *J* = 8.7 Hz, 2H, H<sub>h</sub>). <sup>13</sup>C NMR (101 MHz, CDCl<sub>3</sub>) δ: 151.4, 147.0, 144.0, 140.8, 136.0, 133.4, 131.5, 129.9, 128.1, 127.2, 121.7, 120.6, 119.4, 95.3, 86.1. HR-ESI-MS *m/z* = 243.0921 [M+H-N<sub>2</sub>]<sup>+</sup> calc. 243.0917; 271.0984 [M+H]<sup>+</sup> calc. 271.0978.

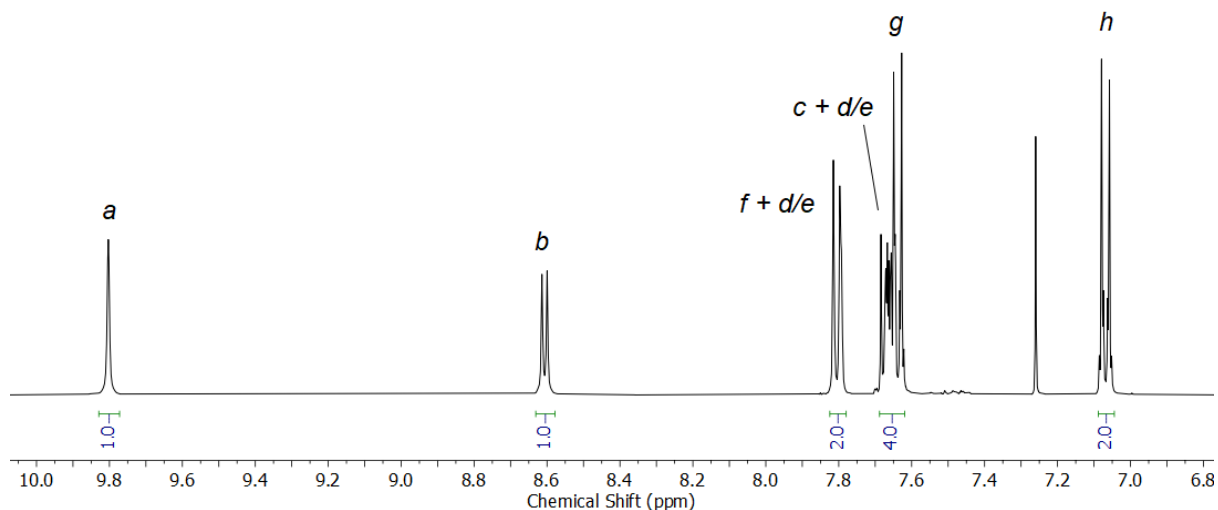

Figure S9 <sup>1</sup>H NMR (CDCl<sub>3</sub>, 400 MHz) of **1**.

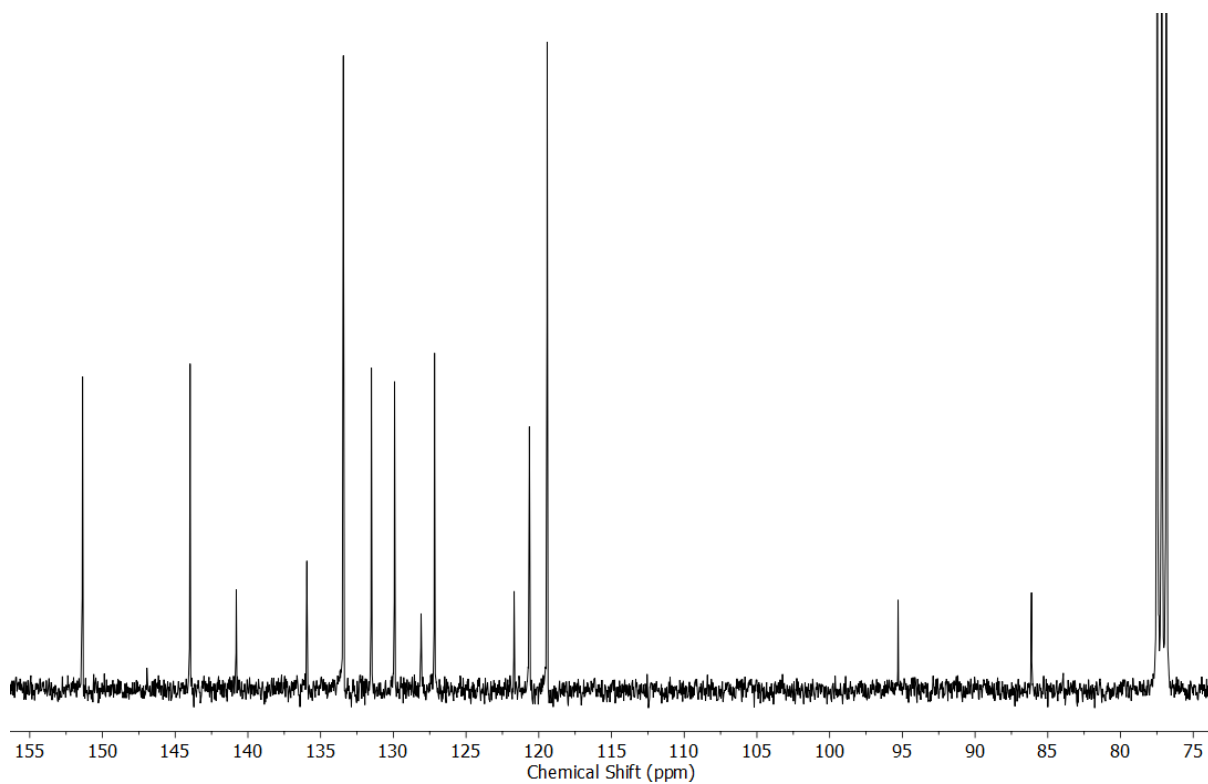

Figure S10  $^{13}\text{C}$  NMR ( $\text{CDCl}_3$ , 101 MHz) of **1**.

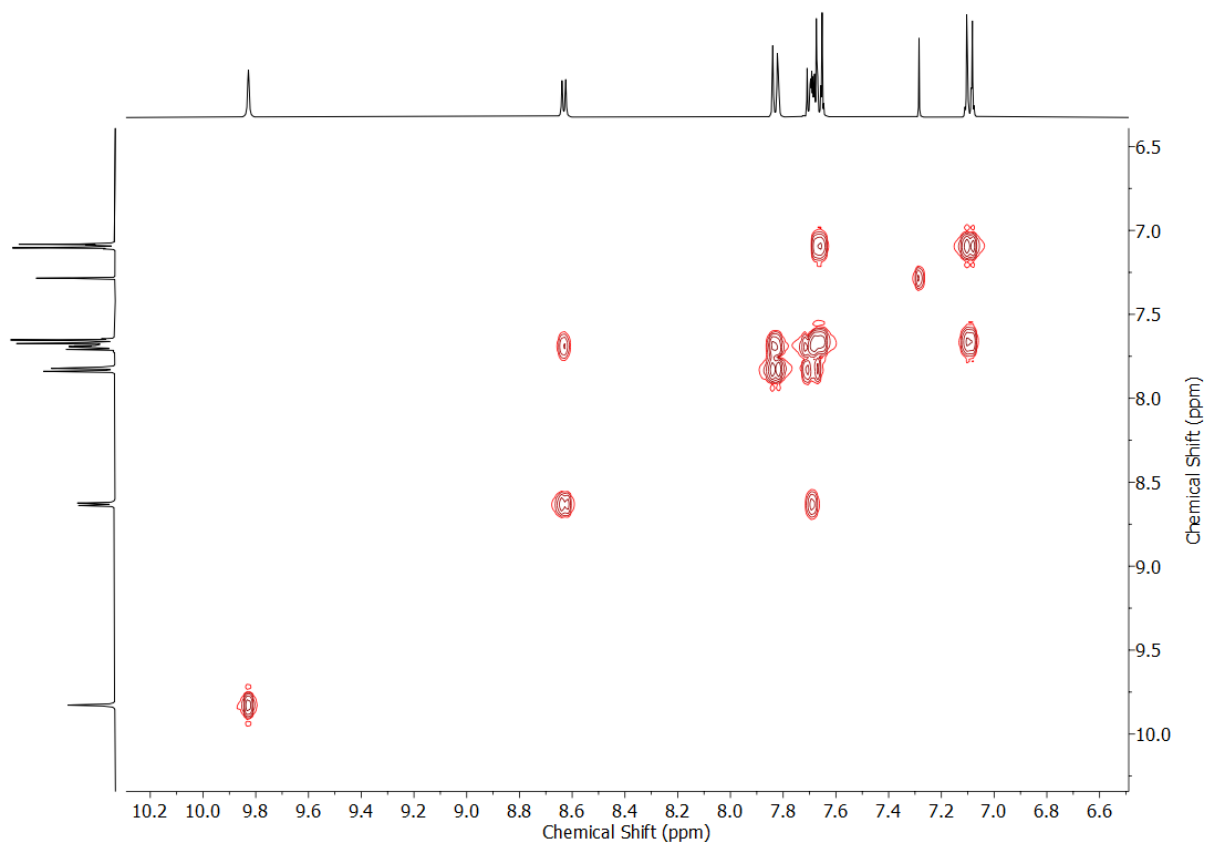

Figure S11 COSY NMR ( $\text{CDCl}_3$ ) of **1**.

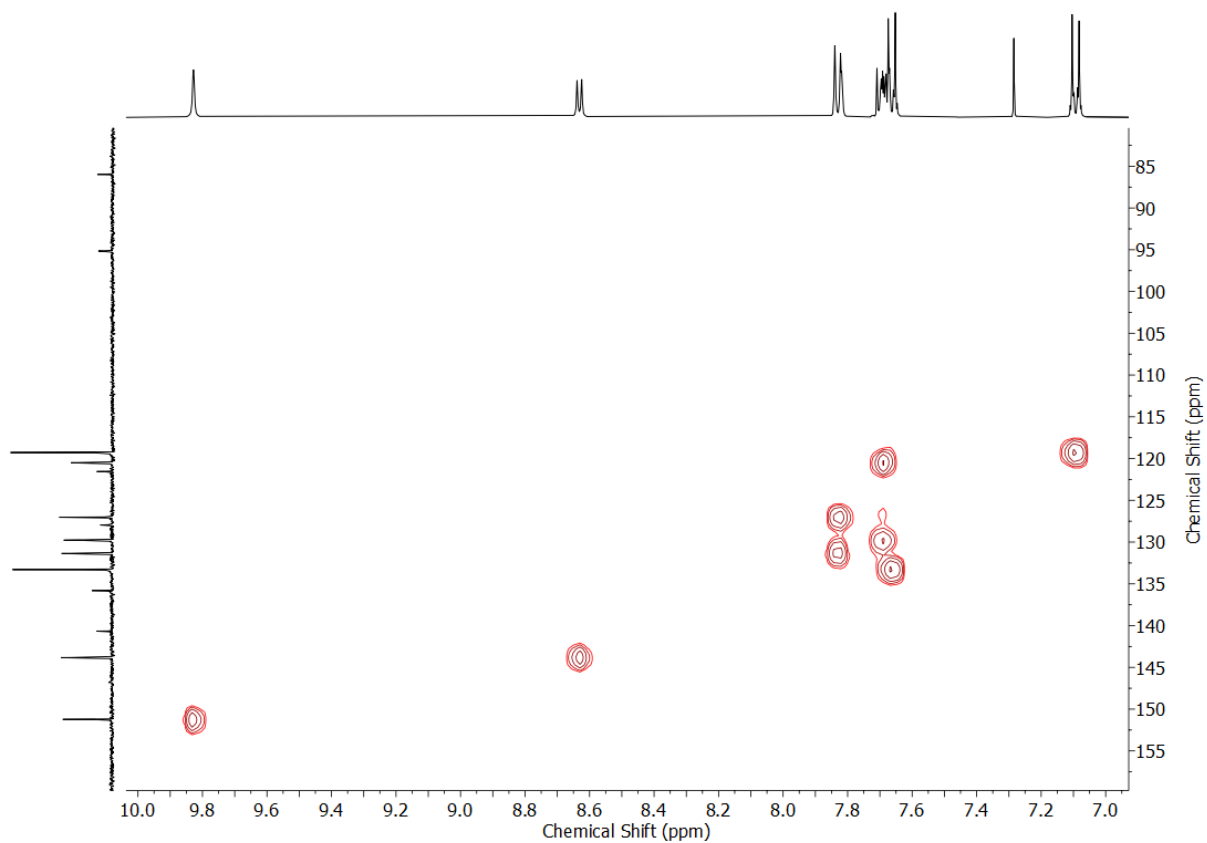

Figure S12 HSQC NMR ( $\text{CDCl}_3$ ) of **1**.

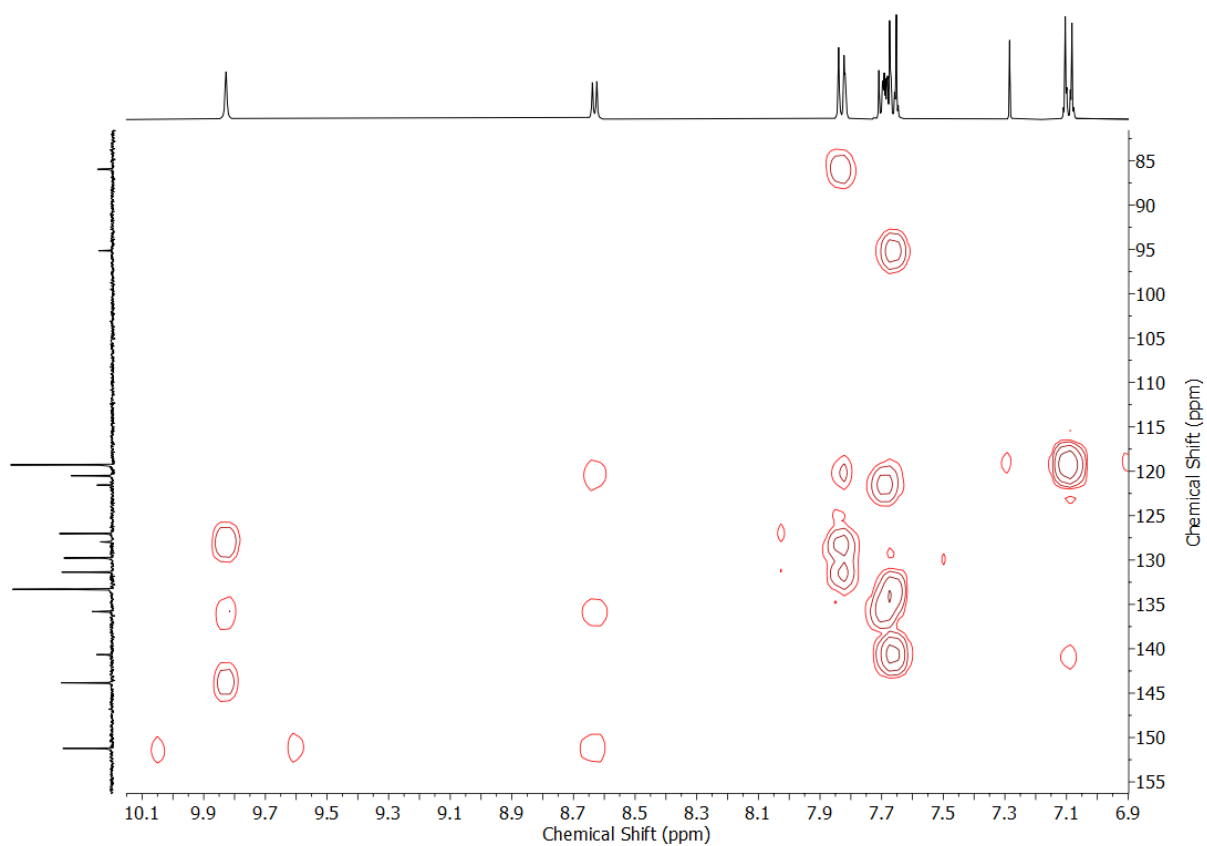

Figure S13 HMBC NMR ( $\text{CDCl}_3$ ) of **1**.

## Synthesis of L<sup>Bu</sup>

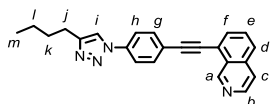

Prepared according to the general procedure with hex-1-yne (86  $\mu$ L, 0.75 mmol, 3.0 eq.). Purification by column chromatography (acetone/ $\text{CH}_2\text{Cl}_2$  step gradient 0:100  $\rightarrow$  5:95  $\rightarrow$  10:90) gave the product as a light yellow solid (78.6 mg, 89%).  $R_f = 0.29$  (1:9 acetone/ $\text{CH}_2\text{Cl}_2$ ). M.p. 132-134  $^\circ\text{C}$ .  $^1\text{H}$  NMR (400 MHz,  $\text{CDCl}_3$ )  $\delta$ : 9.82 (s, 1H, H<sub>a</sub>), 8.62 (d,  $J = 5.7$  Hz, 1H, H<sub>b</sub>), 7.86-7.77 (m, 7H, H<sub>f</sub>, H<sub>g</sub>, H<sub>h</sub>, H<sub>i</sub>, H<sub>d</sub>/H<sub>e</sub>), 7.71-7.67 (m, 2H, H<sub>c</sub>, H<sub>d</sub>/H<sub>e</sub>), 2.82 (t,  $J = 7.7$  Hz, 2H, H<sub>j</sub>), 1.73 (app. p,  $J = 7.5$  Hz, 2H, H<sub>k</sub>), 1.45 (m, 2H, H<sub>l</sub>), 0.97 (t,  $J = 7.4$  Hz, 3H, H<sub>m</sub>).  $^{13}\text{C}$  NMR (101 MHz,  $\text{CDCl}_3$ )  $\delta$ : 151.3, 149.6, 144.0, 137.2, 136.0, 133.3, 131.8, 129.9, 128.1, 127.5, 123.0, 121.3, 120.7, 120.3, 118.7, 94.6, 87.3, 31.6, 25.5, 22.5, 14.0. HR-ESI-MS  $m/z = 353.1763$  [ $\text{M}+\text{H}$ ]<sup>+</sup> calc. 353.1761.

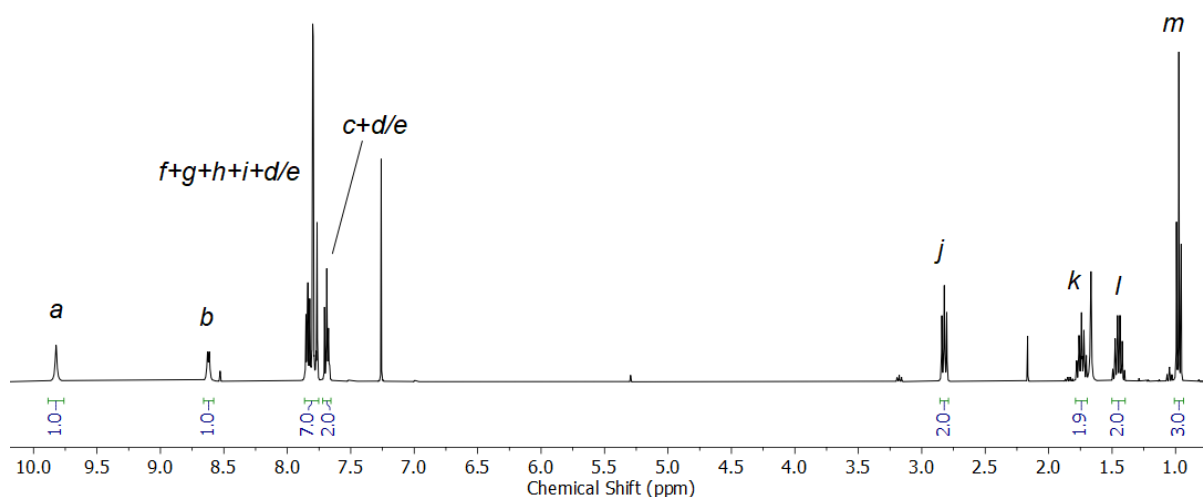

Figure S14  $^1\text{H}$  NMR ( $\text{CDCl}_3$ , 400 MHz) of L<sup>Bu</sup>.

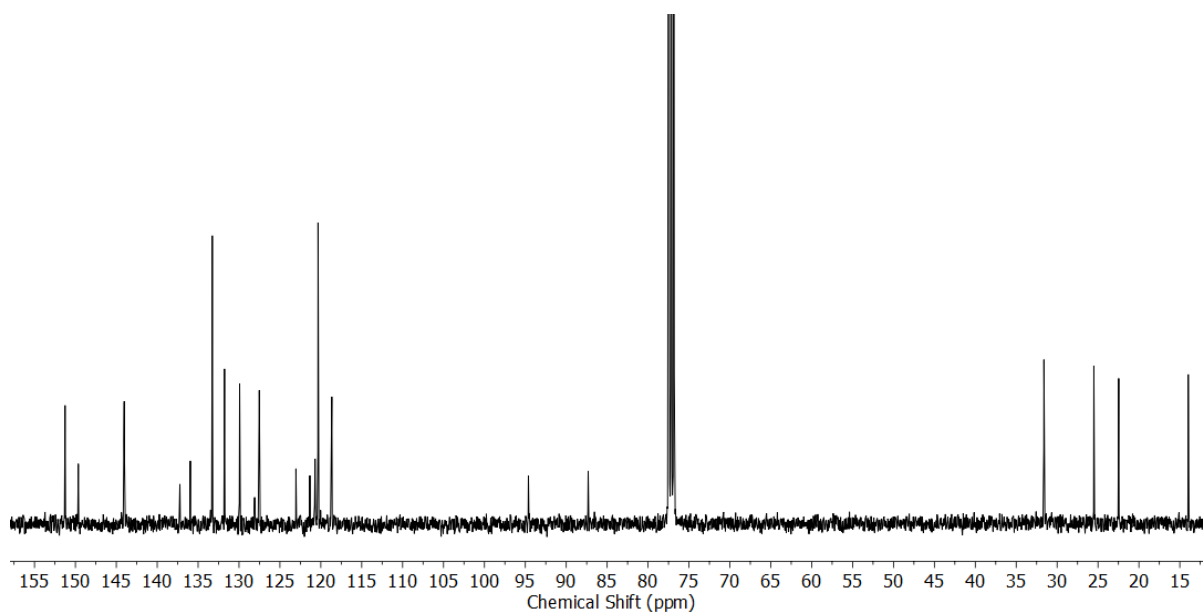

Figure S15  $^{13}\text{C}$  NMR ( $\text{CDCl}_3$ , 101 MHz) of L<sup>Bu</sup>.

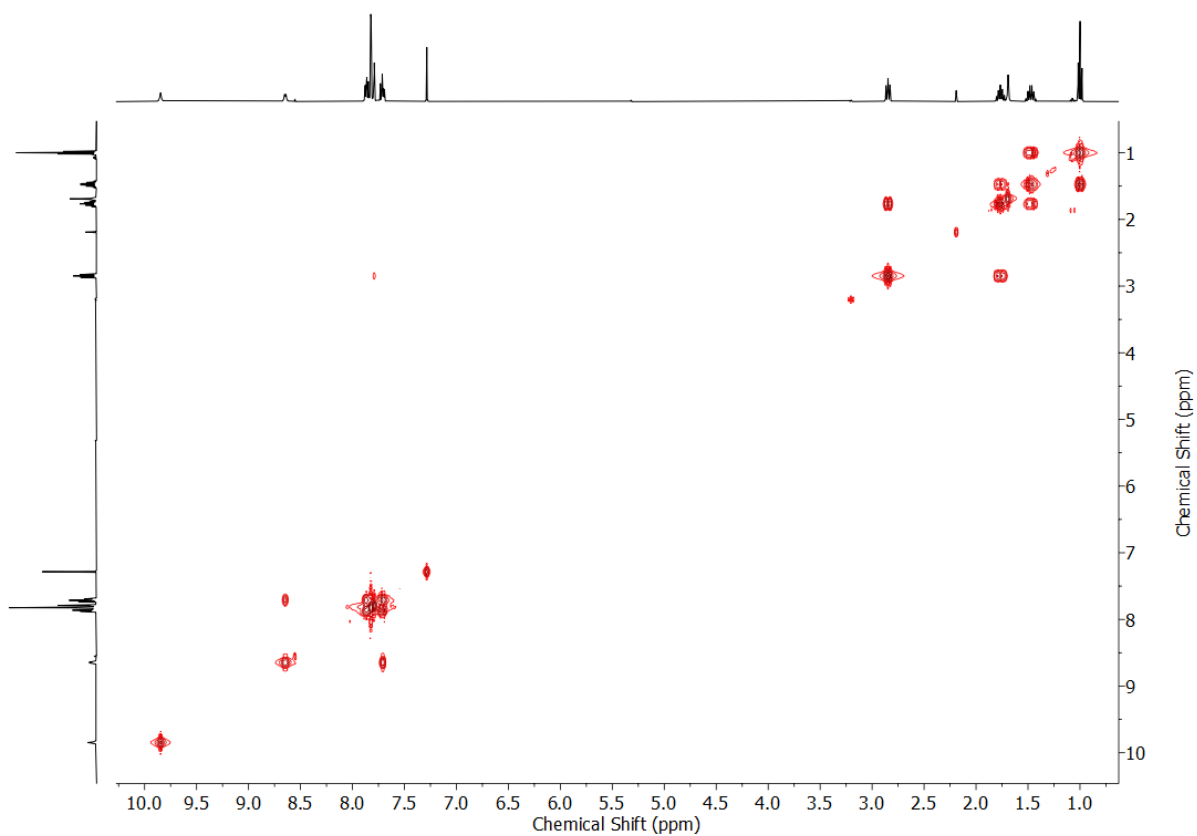

Figure S16 COSY NMR ( $\text{CDCl}_3$ ) of  $\text{L}^{\text{Bu}}$ .

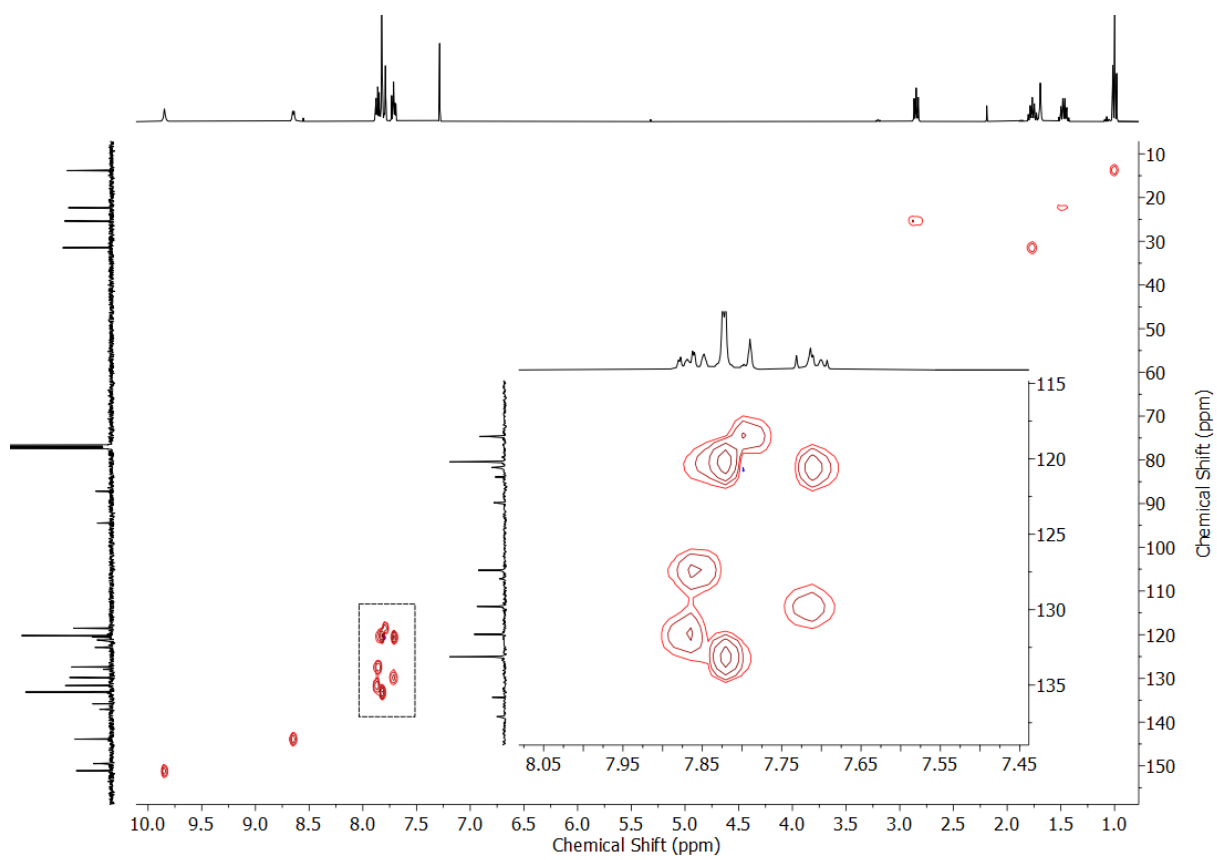

Figure S17 HSQC NMR ( $\text{CDCl}_3$ ) of  $\text{L}^{\text{Bu}}$ .

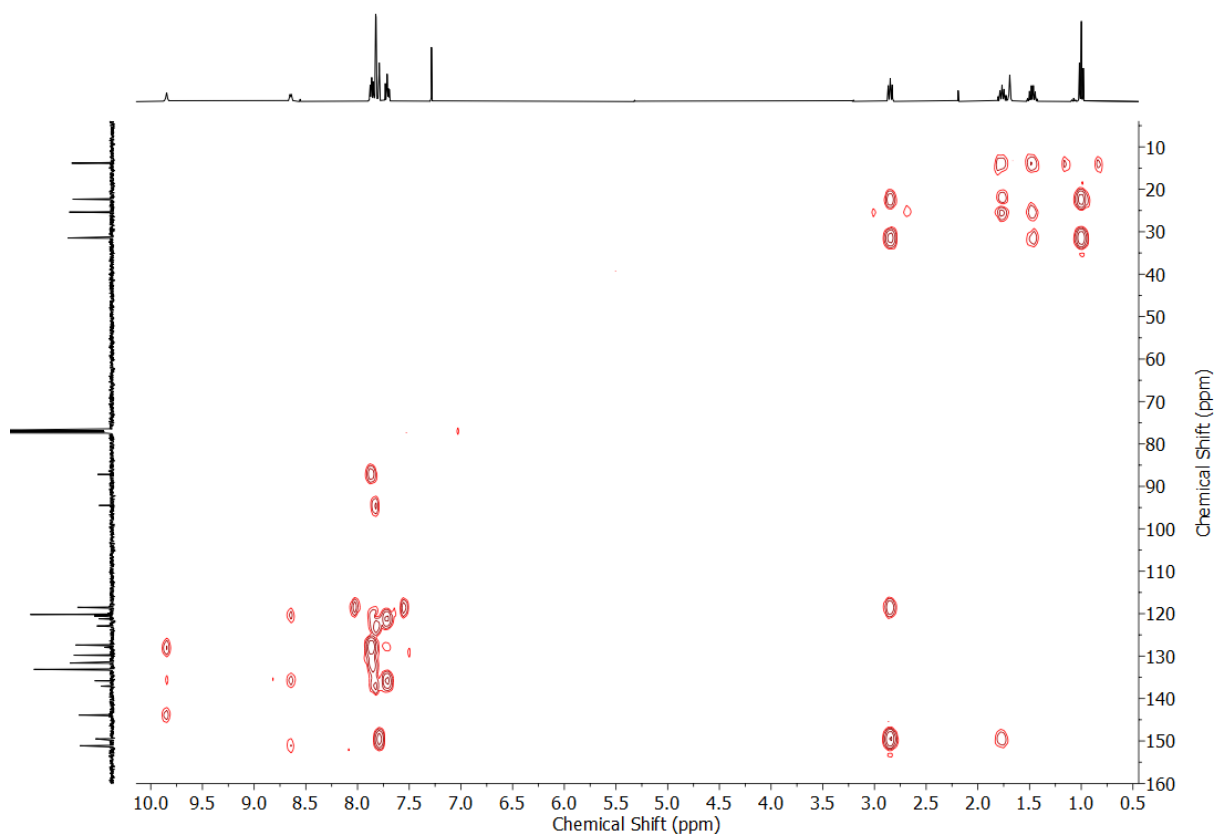

Figure S18 HMBC NMR (CDCl<sub>3</sub>) of L<sup>Bu</sup>.

## Synthesis of L<sup>Bn</sup>

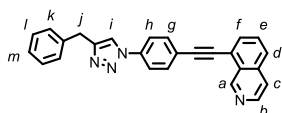

Prepared according to the general procedure with 3-phenyl-1-propyne (93  $\mu$ L, 0.75 mmol, 3.0 eq.). Purification by column chromatography (EtOAc/CH<sub>2</sub>Cl<sub>2</sub> step gradient 0:100  $\rightarrow$  10:90  $\rightarrow$  20:80  $\rightarrow$  30:70) gave the product as a light beige solid (77.1 mg, 80%).  $R_f$  = 0.43 (1:3 EtOAc/CH<sub>2</sub>Cl<sub>2</sub>). M.p. 158-160  $^{\circ}$ C. <sup>1</sup>H NMR (400 MHz, CDCl<sub>3</sub>)  $\delta$ : 9.72 (s, 1H, H<sub>a</sub>), 8.62 (d,  $J$  = 5.7 Hz, 1H, H<sub>b</sub>), 7.85-7.82 (m, 2H, H<sub>f</sub>, 1 of H<sub>d</sub>/H<sub>e</sub>/H<sub>k</sub>/H<sub>l</sub>/H<sub>m</sub>), 7.77 (s, 4H, H<sub>g</sub>, H<sub>h</sub>), 7.70-7.67 (m, 2H, H<sub>c</sub>, 1 of H<sub>d</sub>/H<sub>e</sub>/H<sub>k</sub>/H<sub>l</sub>/H<sub>m</sub>), 7.64 (s, 1H, H<sub>j</sub>), 7.37-7.32 (m, 4H, 4 of H<sub>d</sub>/H<sub>e</sub>/H<sub>k</sub>/H<sub>l</sub>/H<sub>m</sub>), 7.29-7.25 (m, 2H, 2 of H<sub>d</sub>/H<sub>e</sub>/H<sub>k</sub>/H<sub>l</sub>/H<sub>m</sub>), 4.19 (s, 2H, H<sub>i</sub>). <sup>13</sup>C NMR (101 MHz, CDCl<sub>3</sub>)  $\delta$ : 151.3, 149.0, 144.1, 138.8, 137.1, 136.0, 133.3, 131.8, 129.9, 129.0, 128.9, 128.1, 127.6, 126.9, 123.2, 121.3, 120.7, 120.4, 119.5, 94.6, 87.4, 32.5. HR-ESI-MS  $m/z$  = 387.1608 [M+H]<sup>+</sup> calc. 387.1604.

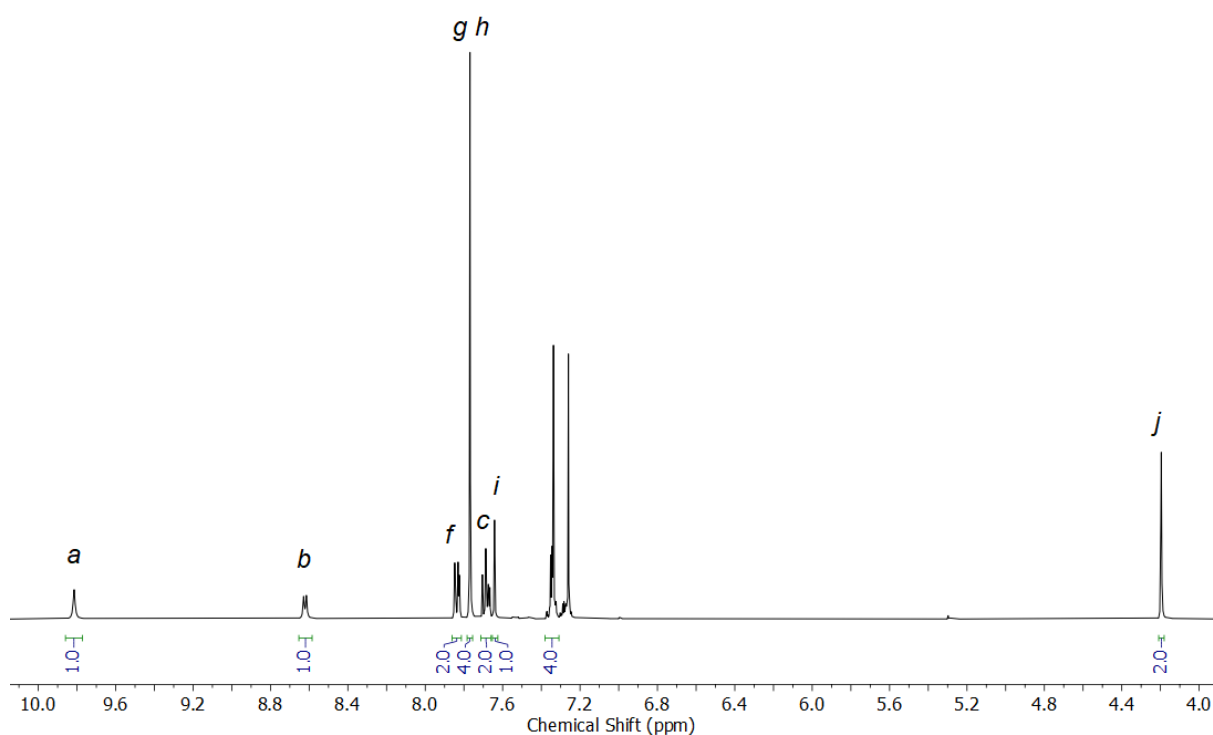

Figure S19 <sup>1</sup>H NMR (CDCl<sub>3</sub>, 400 MHz) of L<sup>Bn</sup>.

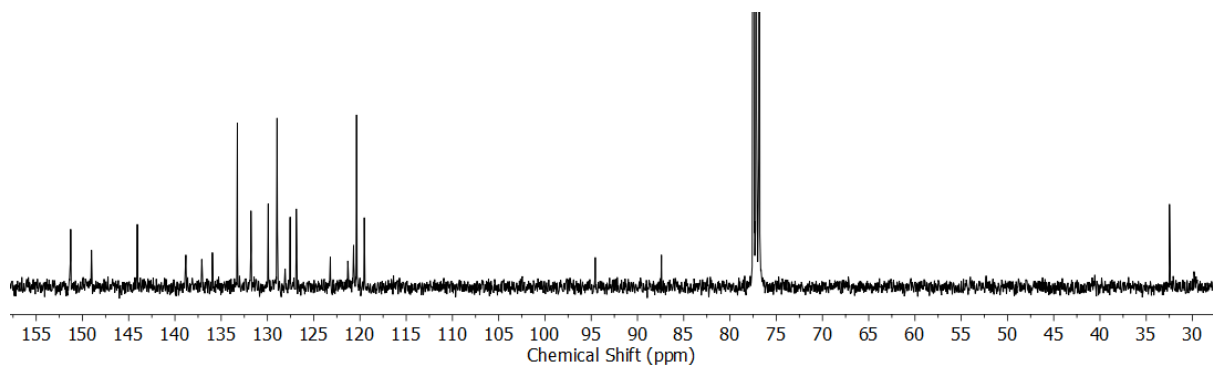

Figure S20 <sup>13</sup>C NMR (CDCl<sub>3</sub>, 101 MHz) of L<sup>Bn</sup>.



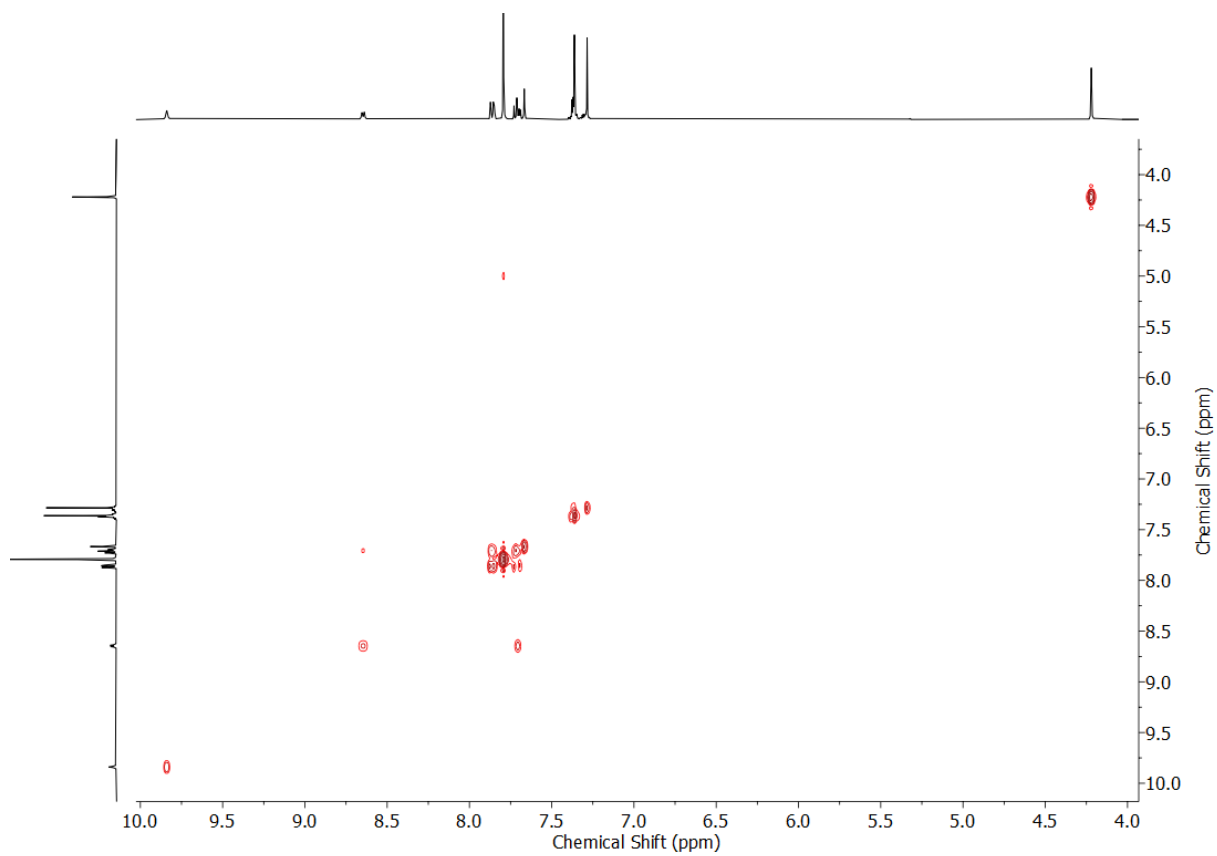

Figure S21 COSY NMR ( $\text{CDCl}_3$ ) of  $\text{L}^{\text{Bn}}$ .

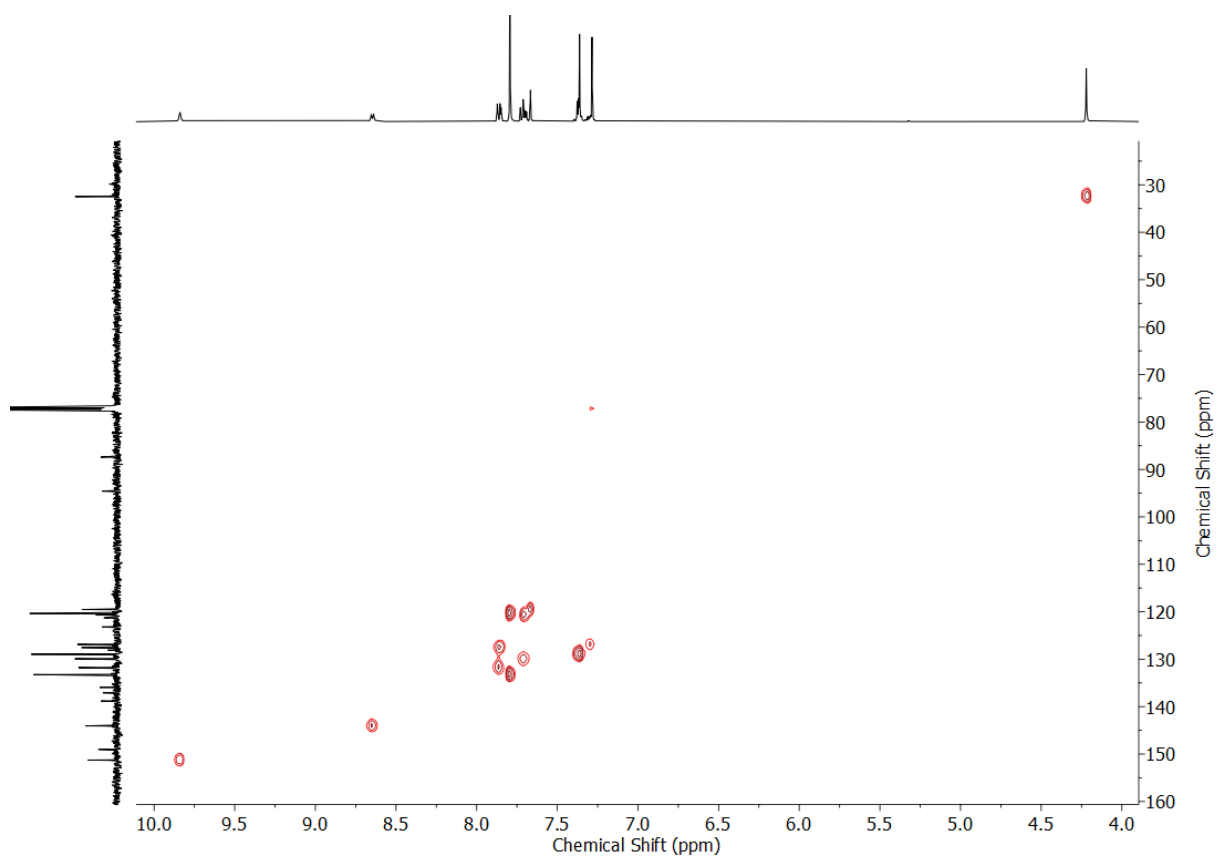

Figure S22 HSQC NMR ( $\text{CDCl}_3$ ) of  $\text{L}^{\text{Bn}}$ .

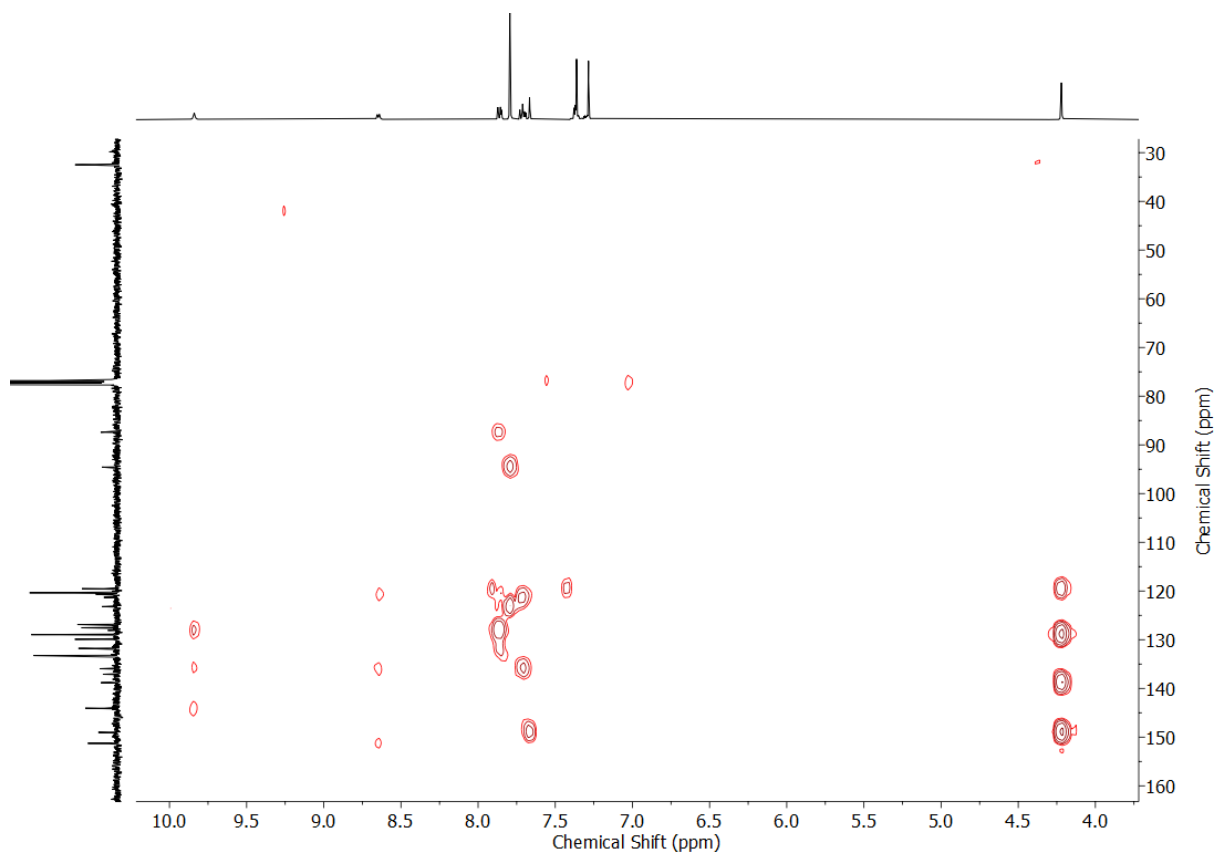

Figure S23 HMBC NMR (CDCl<sub>3</sub>) of L<sup>Bn</sup>.

## Synthesis of L<sup>OH</sup>

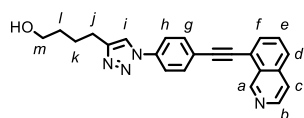

Prepared according to the general procedure with 5-hexyn-1-ol (83  $\mu$ L, 0.75 mmol, 3.0 eq.). Purification by column chromatography (MeOH/CH<sub>2</sub>Cl<sub>2</sub> step gradient 0:100  $\rightarrow$  2:98  $\rightarrow$  3:97  $\rightarrow$  4:96  $\rightarrow$  5:95) gave the product as a light beige solid (60.1 mg, 65%).  $R_f$  = 0.26 (1:19 MeOH/CH<sub>2</sub>Cl<sub>2</sub>). M.p. 192-194  $^{\circ}$ C. <sup>1</sup>H NMR (400 MHz, CDCl<sub>3</sub>)  $\delta$ : 9.79 (s, 1H, H<sub>a</sub>), 8.62 (d,  $J$  = 5.7 Hz, 1H, H<sub>b</sub>), 7.87-7.83 (m, 2H, H<sub>f</sub>, 1 of H<sub>d</sub>/H<sub>e</sub>), 7.80 (app. s, 5H, H<sub>g</sub>, H<sub>h</sub>, H<sub>i</sub>), 7.72-7.68 (m, 2H, H<sub>c</sub>, 1 of H<sub>d</sub>/H<sub>e</sub>), 3.73 (t,  $J$  = 6.4 Hz, 2H, H<sub>m</sub>), 2.87 (m, 2H, H<sub>j</sub>), 1.91-1.83 (m, 2H, H<sub>k</sub>), 1.75-1.67 (m, 2H, H<sub>l</sub>). <sup>13</sup>C NMR (101 MHz, CDCl<sub>3</sub>)  $\delta$ : 151.1, 149.2, 143.8, 137.1, 136.0, 133.3, 131.8, 130.0, 127.5, 123.1, 121.4, 120.9, 120.8, 120.4, 118.8, 94.6, 87.3, 62.7, 32.3, 25.7, 25.5. HR-ESI-MS  $m/z$  = 369.1719 [M+H]<sup>+</sup> calc. 369.1710.

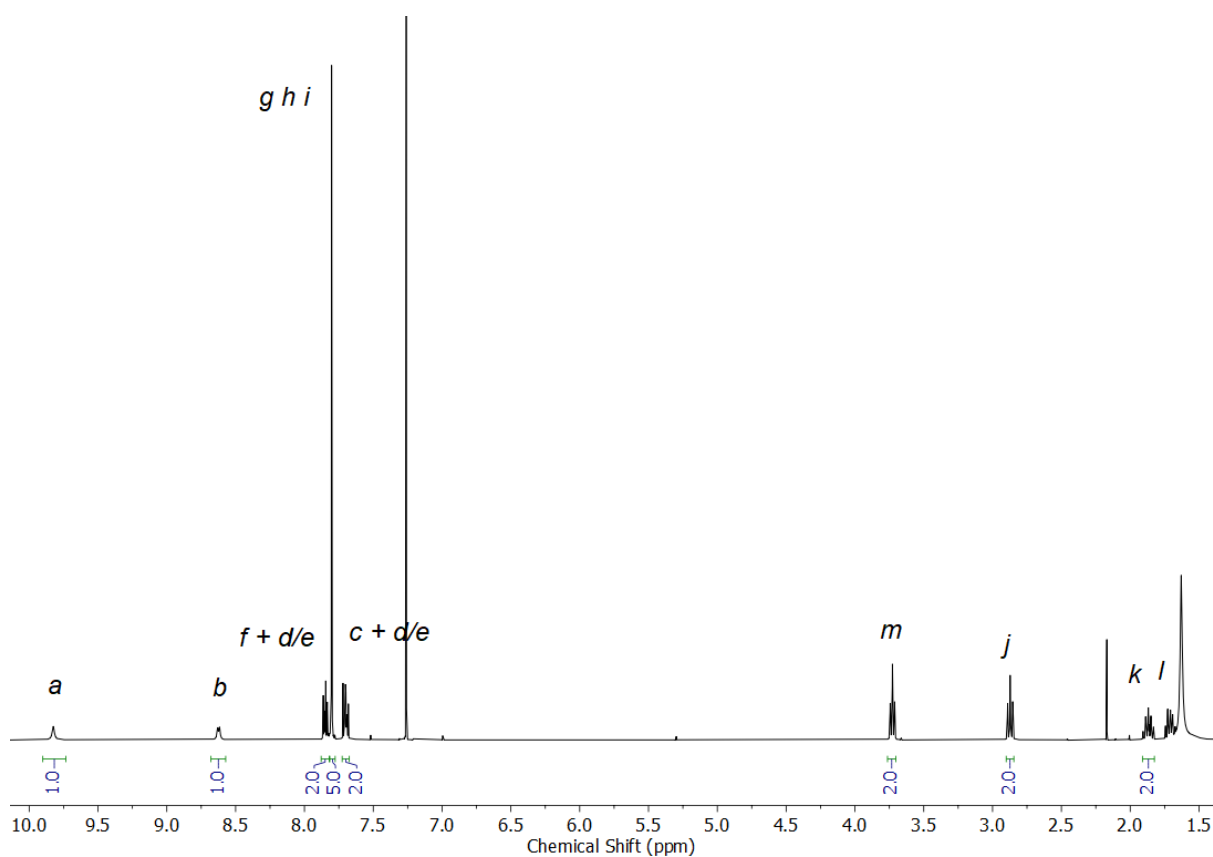

Figure S24 <sup>1</sup>H NMR (CDCl<sub>3</sub>, 400 MHz) of L<sup>OH</sup>.

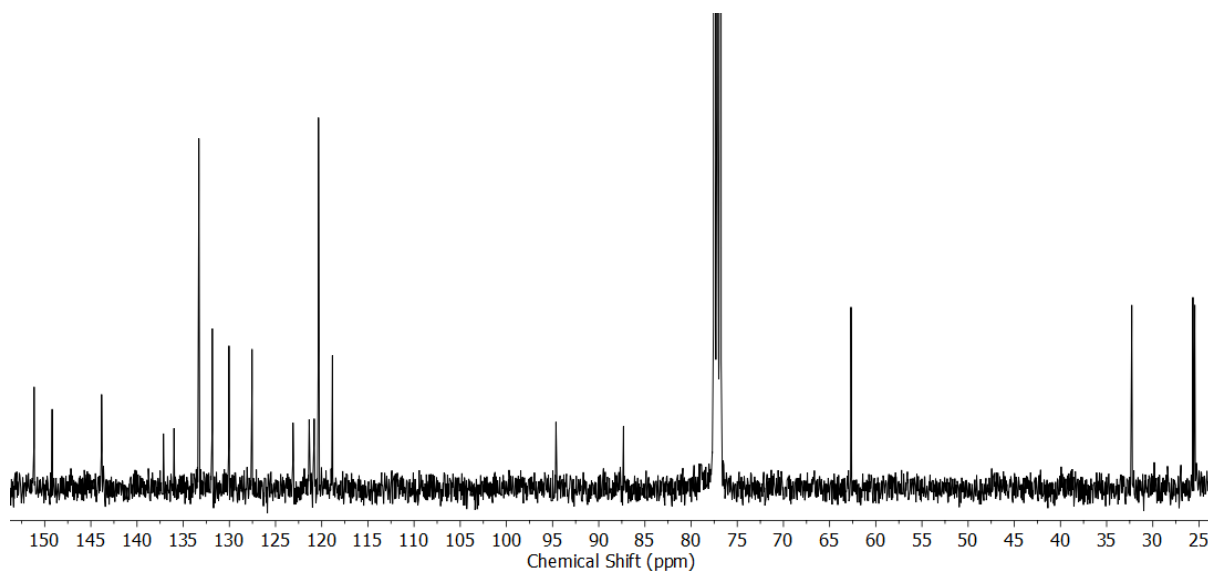

Figure S25  $^{13}\text{C}$  NMR ( $\text{CDCl}_3$ , 101 MHz) of  $\text{L}^{\text{OH}}$ .

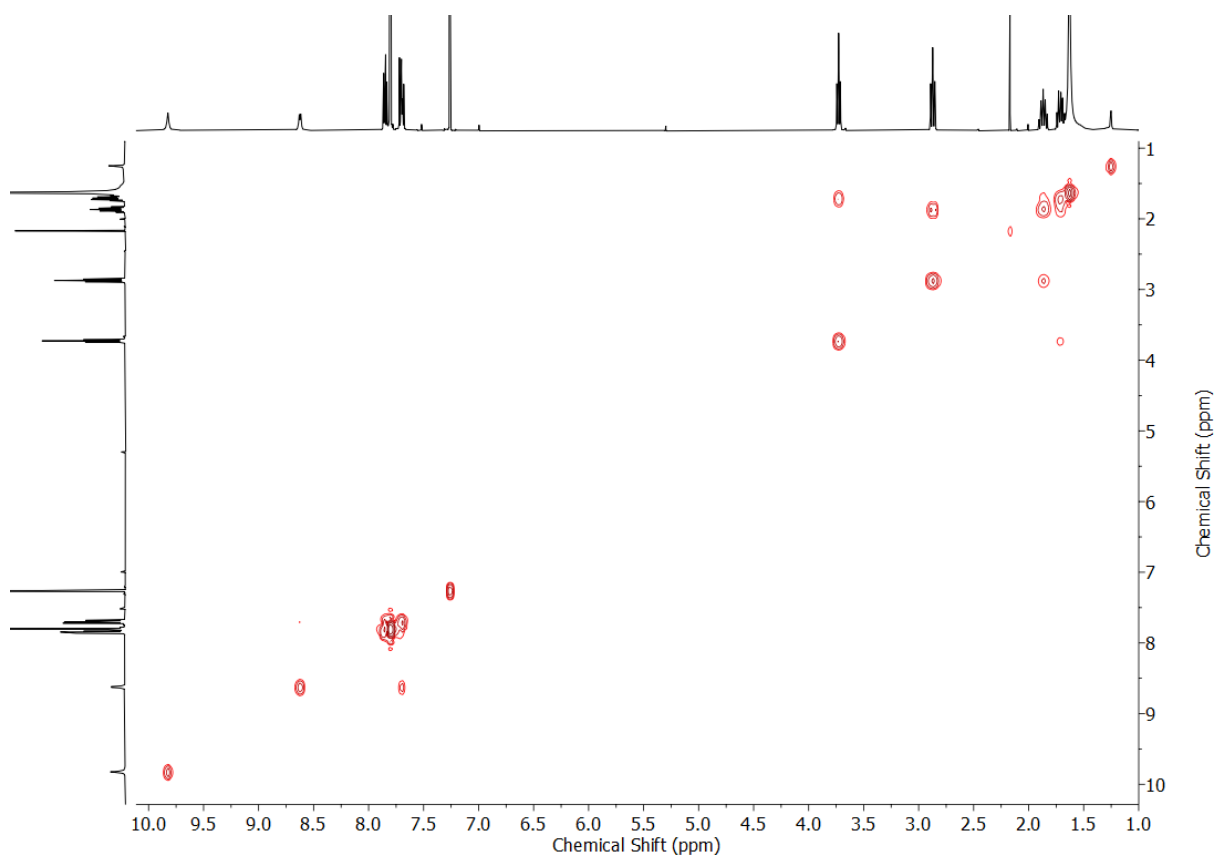

Figure S26 COSY NMR ( $\text{CDCl}_3$ ) of  $\text{L}^{\text{OH}}$ .

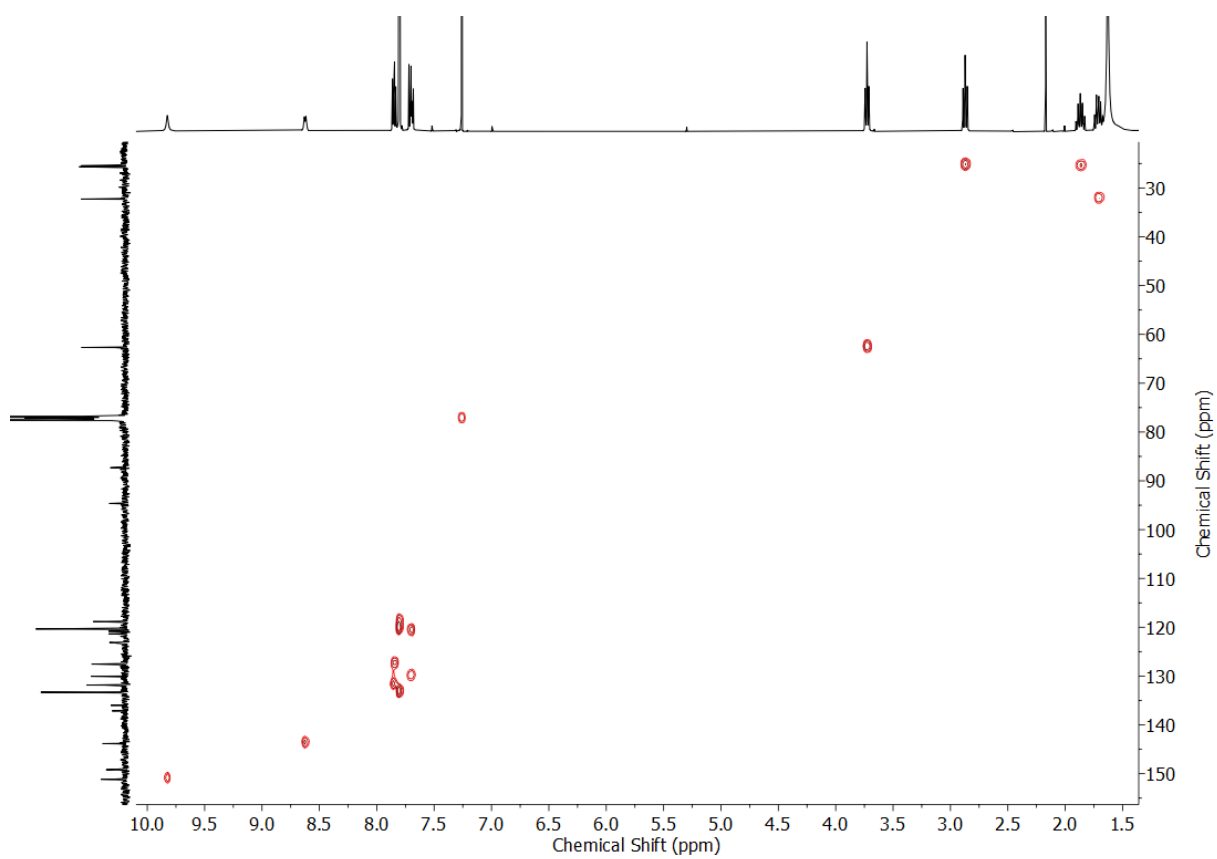

Figure S27 HSQC NMR ( $\text{CDCl}_3$ ) of  $\text{L}^{\text{OH}}$ .

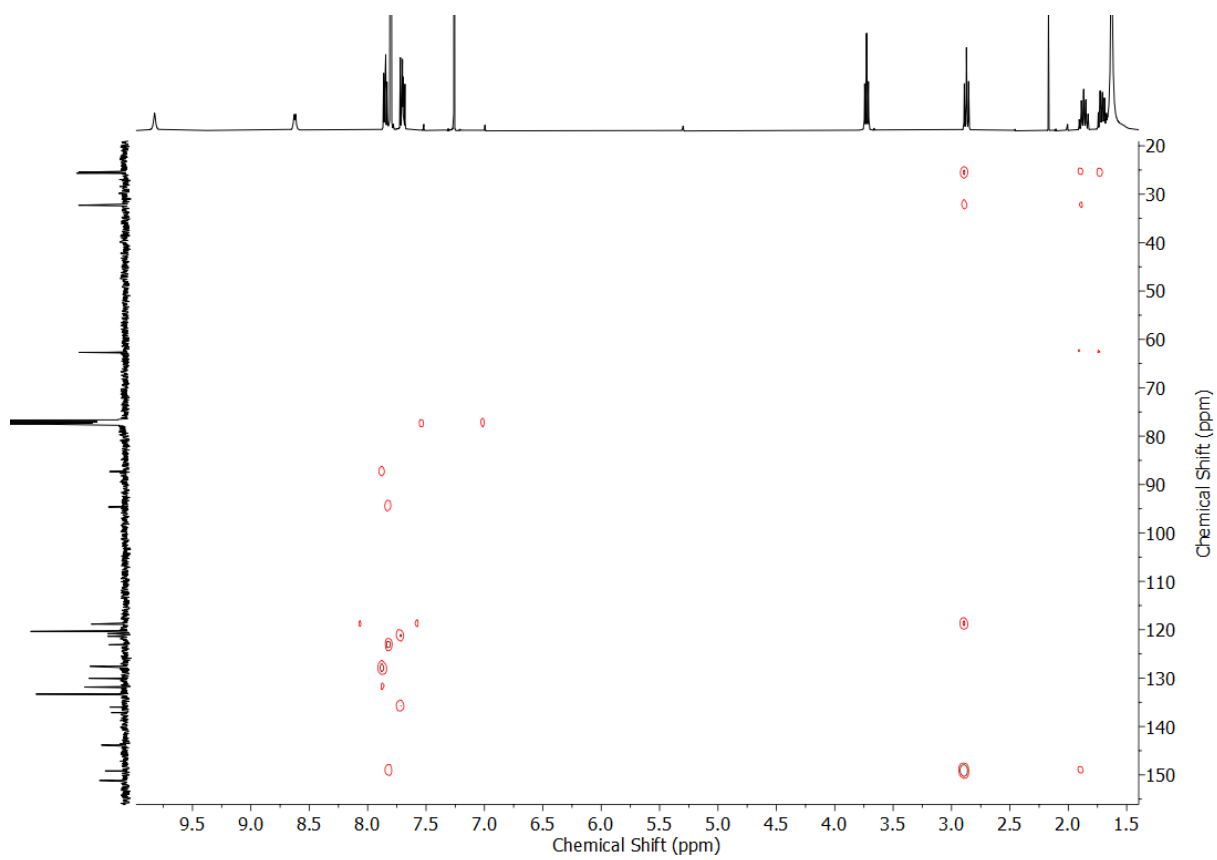

Figure S28 HMBC NMR ( $\text{CDCl}_3$ ) of  $\text{L}^{\text{OH}}$ .

## Synthesis of L<sup>Phth</sup>

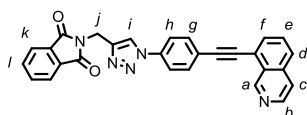

Prepared according to the general procedure with N-propargylphthalimide (57.9 mg, 0.313 mmol, 1.25 eq.). Purification by column chromatography (acetone/CH<sub>2</sub>Cl<sub>2</sub> step gradient 0:100 → 15:85 in 5% increments) gave the product as a light yellow solid (113 mg, 99%). R<sub>f</sub> = 0.30 (1:9 acetone/CH<sub>2</sub>Cl<sub>2</sub>). M.p. 219-221 °C. <sup>1</sup>H NMR (400 MHz, CDCl<sub>3</sub>) δ: 9.83 (s, 1H, H<sub>a</sub>), 8.61 (d, *J* = 5.9 Hz, 1H, H<sub>b</sub>), 8.10 (s, 1H, H<sub>i</sub>), 7.92-7.87 (m, 4H, H<sub>d</sub>/H<sub>e</sub>, H<sub>f</sub>, H<sub>k</sub>/H<sub>l</sub>), 7.81-7.78 (m, 6H, H<sub>c</sub>, H<sub>d</sub>/H<sub>e</sub>, H<sub>g</sub>, H<sub>h</sub>), 7.75-7.73 (dd, *J* = 5.5, 3.0 Hz, 2H, H<sub>k</sub>/H<sub>l</sub>), 5.11 (s, 2H, H<sub>j</sub>). <sup>13</sup>C NMR (101 MHz, CDCl<sub>3</sub>) δ: 167.8, 149.8, 143.9, 141.4, 137.0, 136.6, 134.4, 133.4, 132.5, 132.2, 131.3, 127.9, 127.6, 123.7, 123.1, 122.0, 121.8, 121.1, 120.6, 95.3, 86.9, 33.2. HR-ESI-MS *m/z* = 456.1463 [M+H]<sup>+</sup> calc. 456.1461.

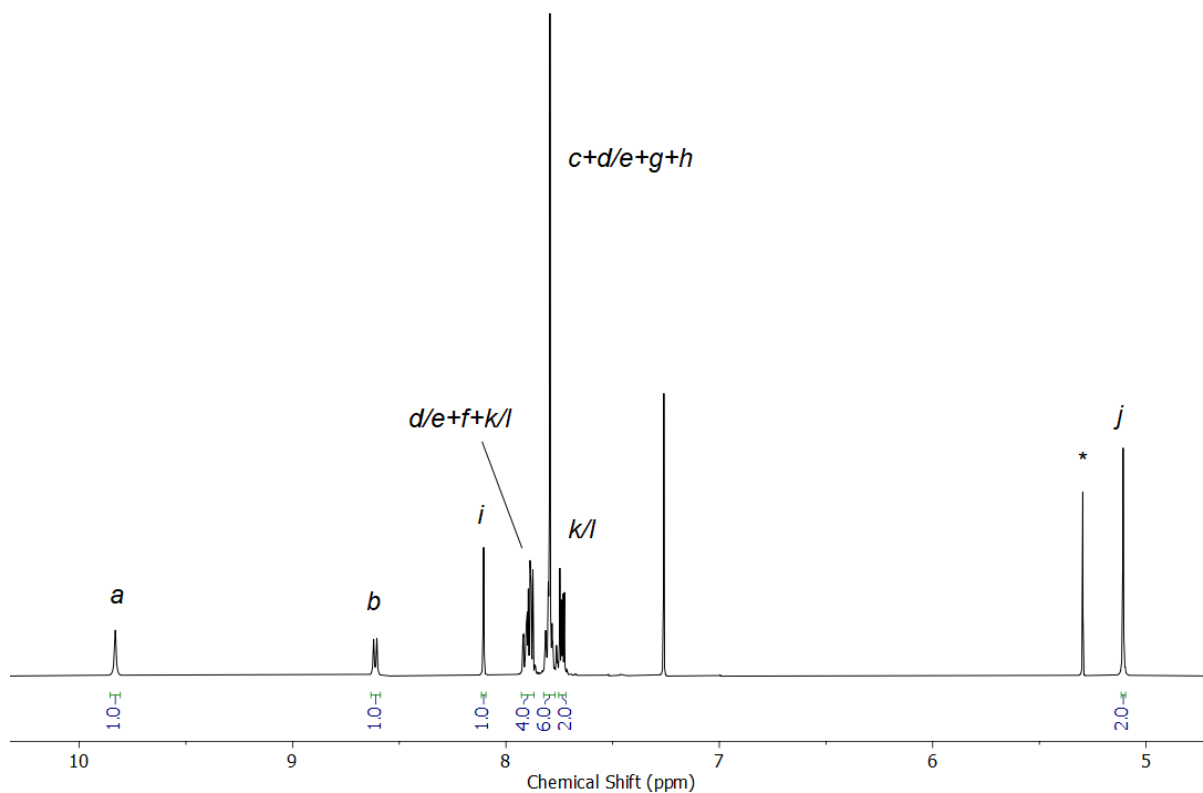

Figure S29 <sup>1</sup>H NMR (CDCl<sub>3</sub>, 400 MHz) of L<sup>Phth</sup>.

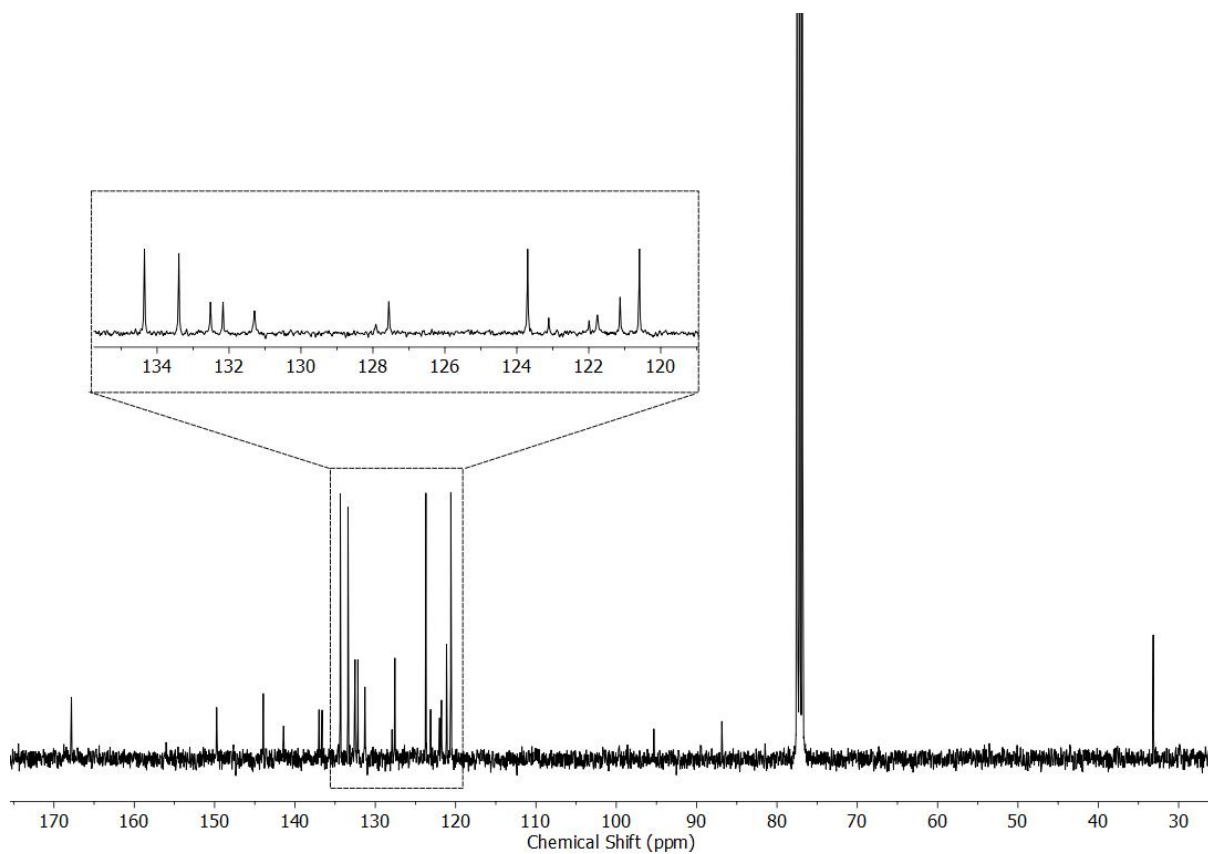

Figure S30  $^{13}\text{C}$  NMR ( $\text{CDCl}_3$ , 101 MHz) of  $\text{L}^{\text{Phth}}$ .

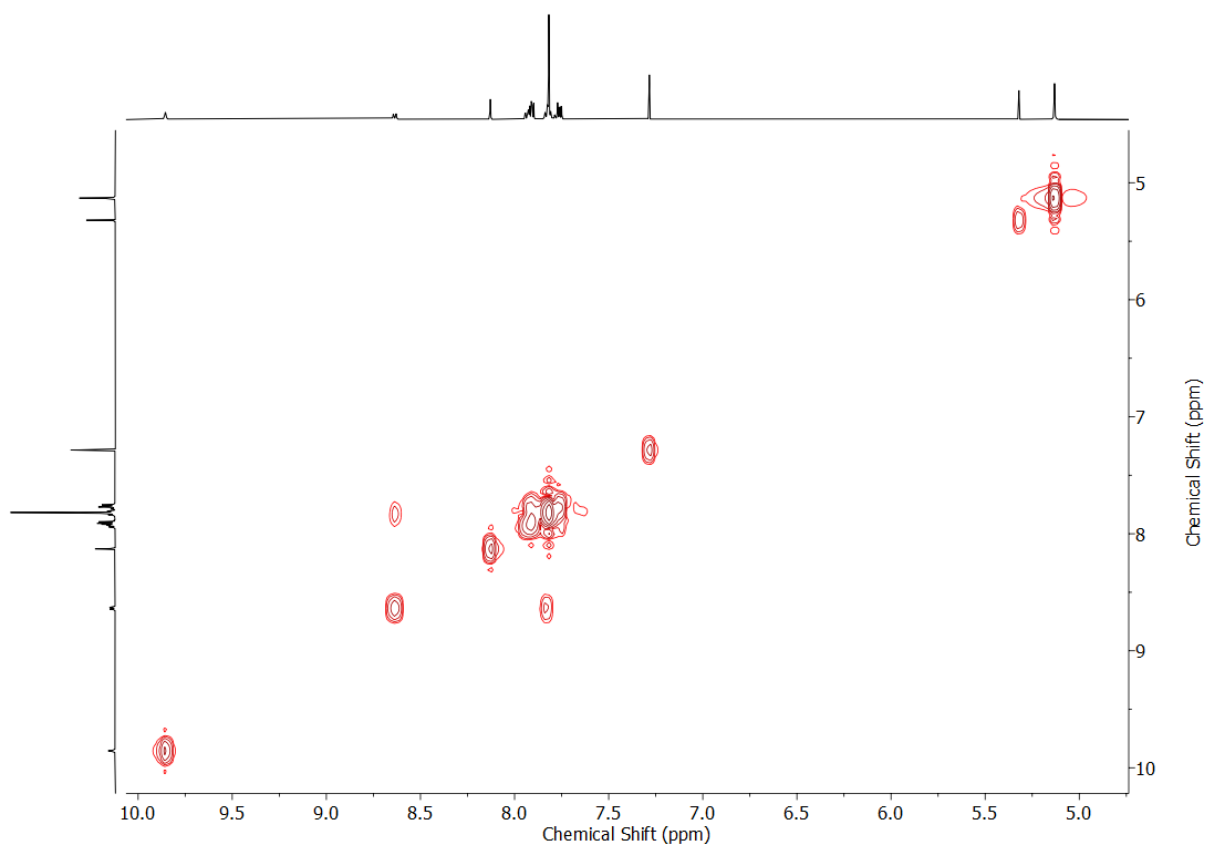

Figure S31 COSY NMR ( $\text{CDCl}_3$ ) of  $\text{L}^{\text{Phth}}$ .

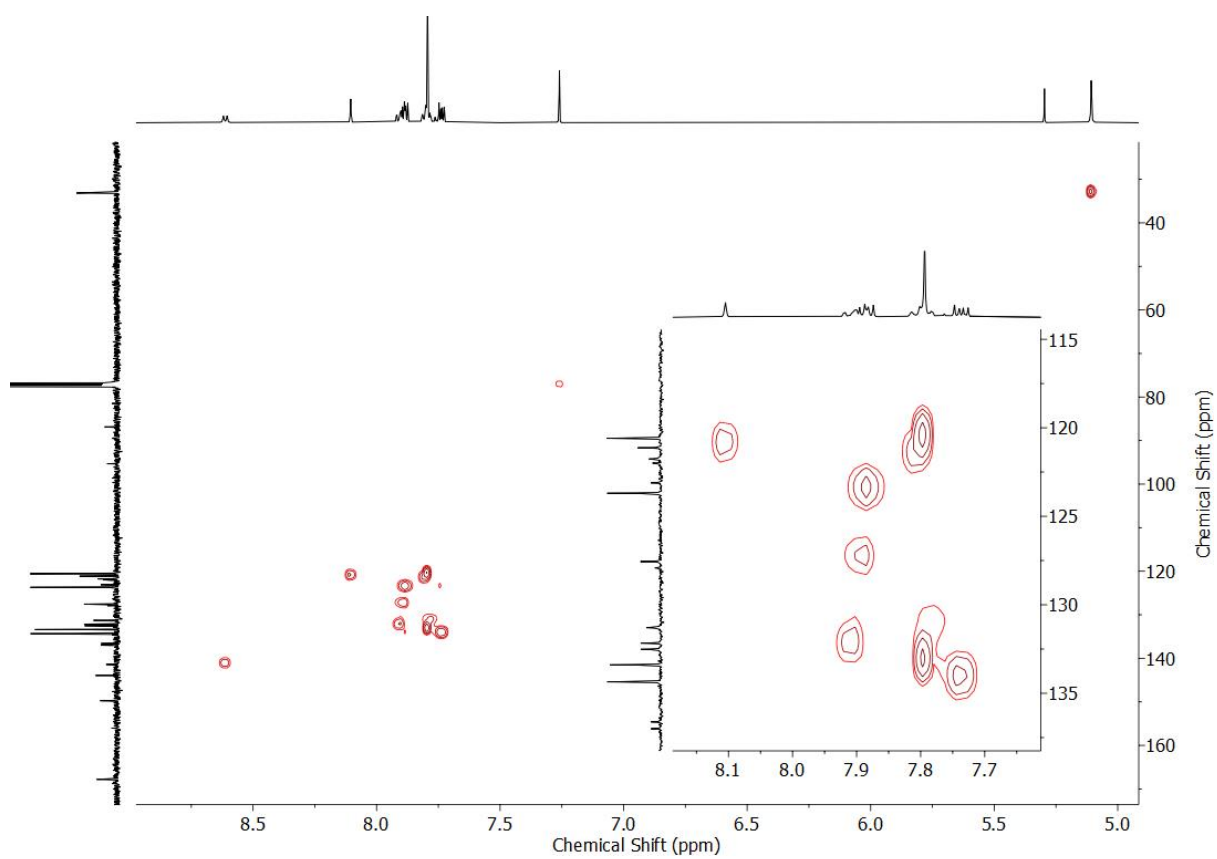

Figure S32 HSQC NMR ( $\text{CDCl}_3$ ) of  $\text{L}^{\text{Phth}}$ .

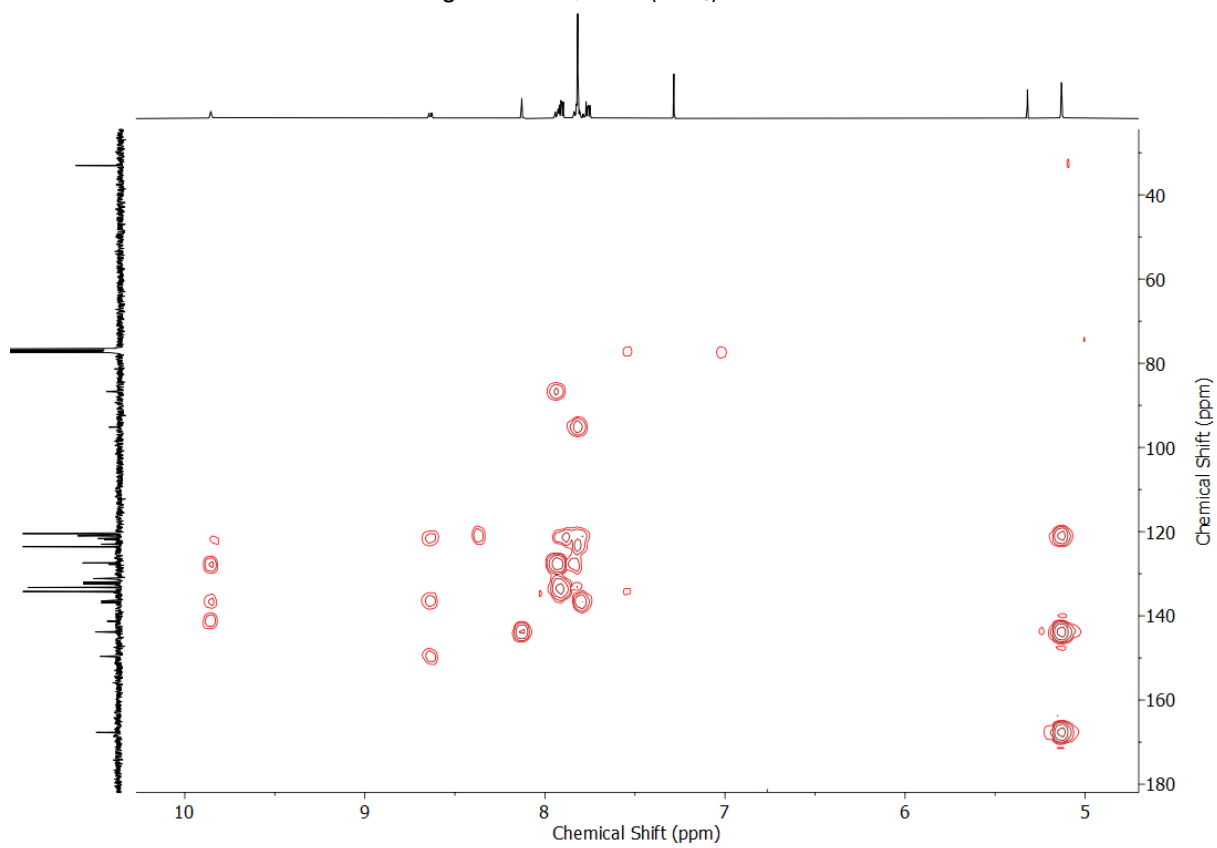

Figure S33 HMBC NMR ( $\text{CDCl}_3$ ) of  $\text{L}^{\text{Phth}}$ .



## Synthesis of L<sup>Ene</sup>

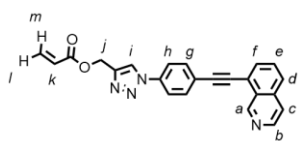

Prepared according to the general procedure with propargyl acrylate (83  $\mu$ L, 0.75 mmol, 3 eq.). Purification by column chromatography (acetone/ $\text{CH}_2\text{Cl}_2$  step gradient 0:100  $\rightarrow$  15:85 in 5% increments) gave the product as a light yellow solid (79.4 mg, 83%).  $R_f = 0.34$  (1:9 acetone/ $\text{CH}_2\text{Cl}_2$ ). M.p. 145-147  $^\circ\text{C}$ .  $^1\text{H}$  NMR (500 MHz,  $\text{CDCl}_3$ )  $\delta$ : 9.88 (br. s, 1H,  $H_a$ ), 8.66 (br. s, 1H,  $H_b$ ), 8.14 (s, 1H,  $H_i$ ), 7.89 (m, 2H,  $H_d/H_e$ ,  $H_f$ ), 7.87-7.74 (m, 6H,  $H_c$ ,  $H_d/H_e$ ,  $H_g$ ,  $H_h$ ), 6.48 (dd,  $J = 17.4, 1.3$  Hz, 1H,  $H_m$ ), 6.17 (dd,  $J = 17.3, 10.5$  Hz, 1H,  $H_k$ ), 5.89 (dd,  $J = 10.5, 1.4$  Hz, 1H,  $H_l$ ), 5.41 (s, 2H,  $H_j$ ).  $^{13}\text{C}$  NMR (126 MHz,  $\text{CDCl}_3$ )  $\delta$ : 166.2, 150.3, 144.0, 142.4, 136.9, 136.3, 133.4, 132.3, 131.9, 130.7, 128.0, 127.6, 123.4, 122.1, 121.7, 120.6, 94.9, 87.2, 57.7 (2  $\times$  4 $^\circ$  C signals missing). HR-ESI-MS  $m/z = 381.1356$  [ $M+H$ ] $^+$  calc. 381.1352.

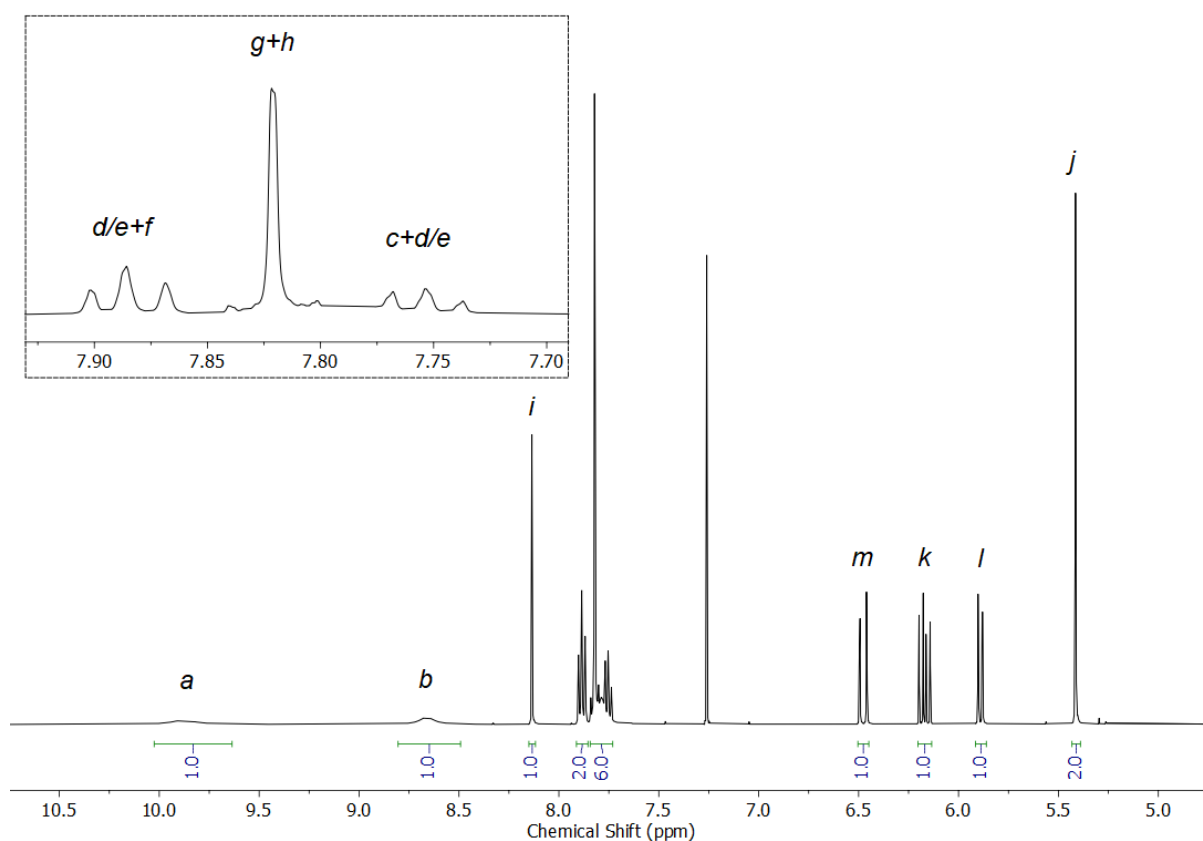

Figure S34  $^1\text{H}$  NMR ( $\text{CDCl}_3$ , 500 MHz) of L<sup>Ene</sup>.

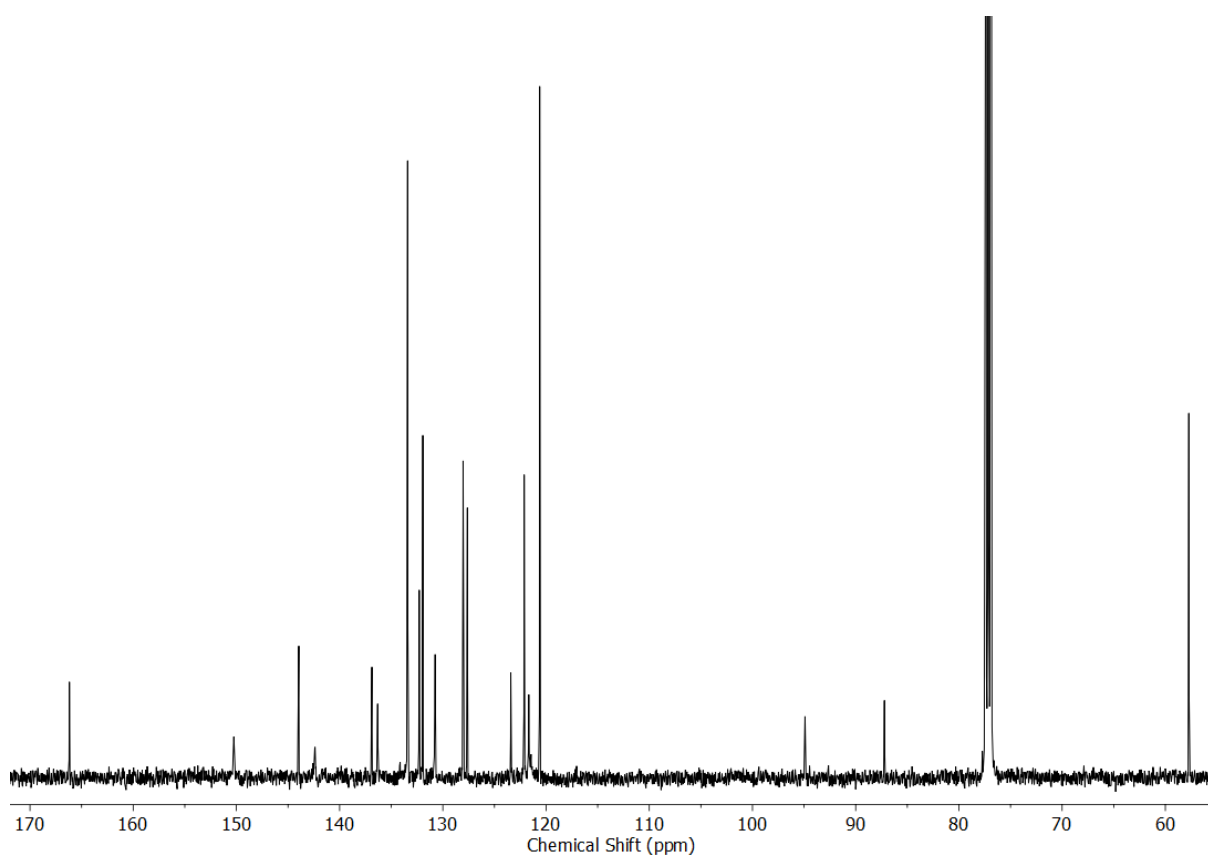

Figure S35  $^{13}\text{C}$  NMR ( $\text{CDCl}_3$ , 126 MHz) of  $\text{L}^{\text{Ene}}$ .

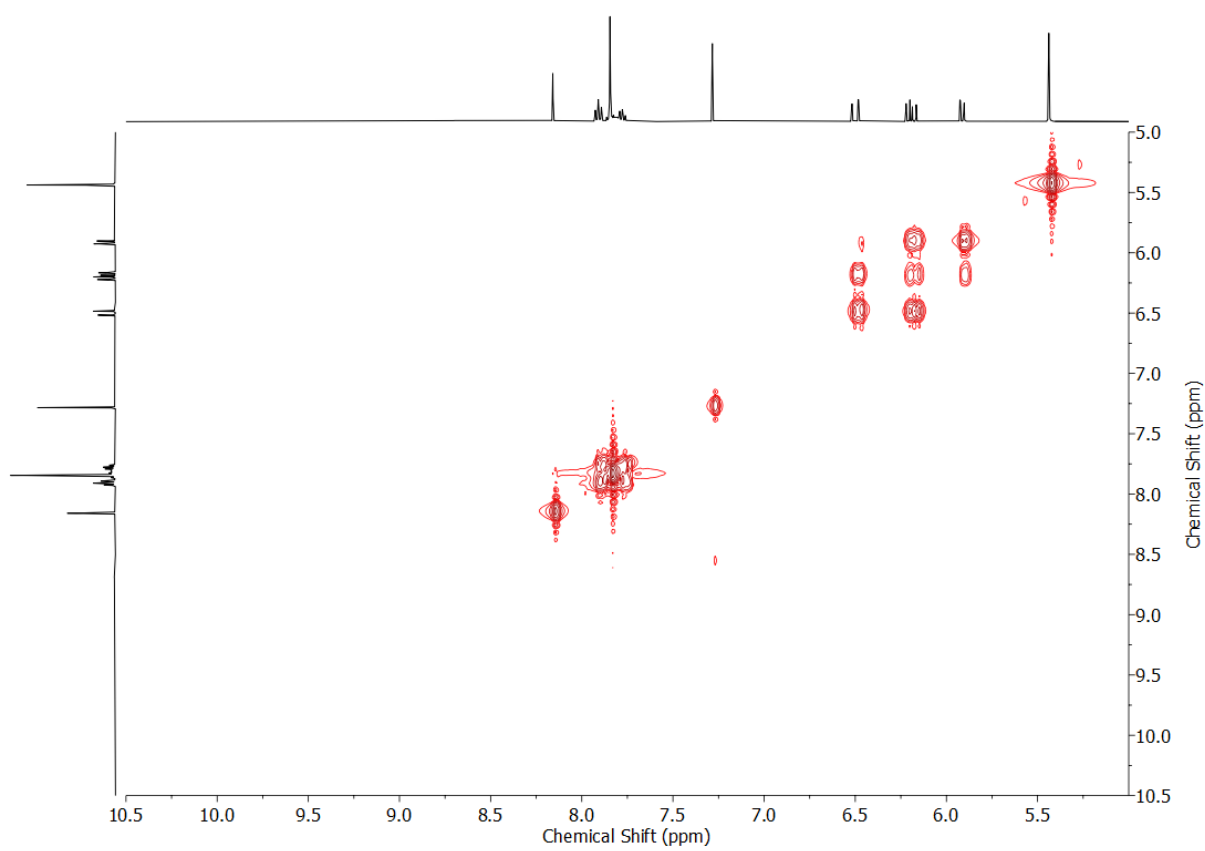

Figure S36 COSY NMR ( $\text{CDCl}_3$ ) of  $\text{L}^{\text{Ene}}$ .

## Synthesis of L<sup>Anth</sup>

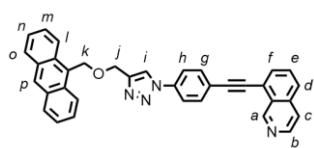

Prepared according to the general procedure with **S1** (77.0 mg, 0.313 mmol, 1.25 eq.). Purification by column chromatography (1:9 acetone/CH<sub>2</sub>Cl<sub>2</sub>) gave the product as a yellow solid (110 mg, 85%). R<sub>f</sub> = 0.44 (1:9 acetone/CH<sub>2</sub>Cl<sub>2</sub>). <sup>1</sup>H NMR (400 MHz, CDCl<sub>3</sub>) δ: 9.82 (s, 1H, H<sub>a</sub>), 8.61 (d, *J* = 5.8 Hz, 1H, H<sub>b</sub>), 8.48 (s, 1H, H<sub>p</sub>), 8.38 (dd, *J* = 8.9, 1.0 Hz, 2H, H<sub>o</sub>/H<sub>l</sub>), 8.02 (m, 2H, H<sub>o</sub>/H<sub>l</sub>), 7.92 (s, 1H, H<sub>i</sub>), 7.89-7.86 (m, 2H, H<sub>d</sub>/H<sub>e</sub>, H<sub>f</sub>), 7.80-7.73 (m, 6H, H<sub>c</sub>, H<sub>d</sub>/H<sub>e</sub>, H<sub>g</sub>, H<sub>h</sub>), 7.55 (ddd, *J* = 8.8, 6.5, 1.4 Hz, 2H, H<sub>m</sub>/H<sub>n</sub>), 7.48 (ddd, *J* = 7.8, 6.5, 1.1 Hz, 2H, H<sub>m</sub>/H<sub>n</sub>), 5.67 (s, 2H, H<sub>k</sub>), 4.96 (d, *J* = 0.7 Hz, 2H, H<sub>j</sub>). <sup>13</sup>C NMR (101 MHz, CDCl<sub>3</sub>) δ: 150.2, 146.8, 142.2, 137.0, 136.4, 133.4, 132.3, 131.6, 131.2, 130.8, 129.2, 128.8, 128.3, 128.0, 127.5, 126.5, 125.2, 124.4, 123.1, 121.8, 121.4, 120.7, 120.5, 95.1, 87.0, 65.0, 64.1. HR-ESI-MS *m/z* = 517.2024 [M+H]<sup>+</sup> calc. 517.2028.

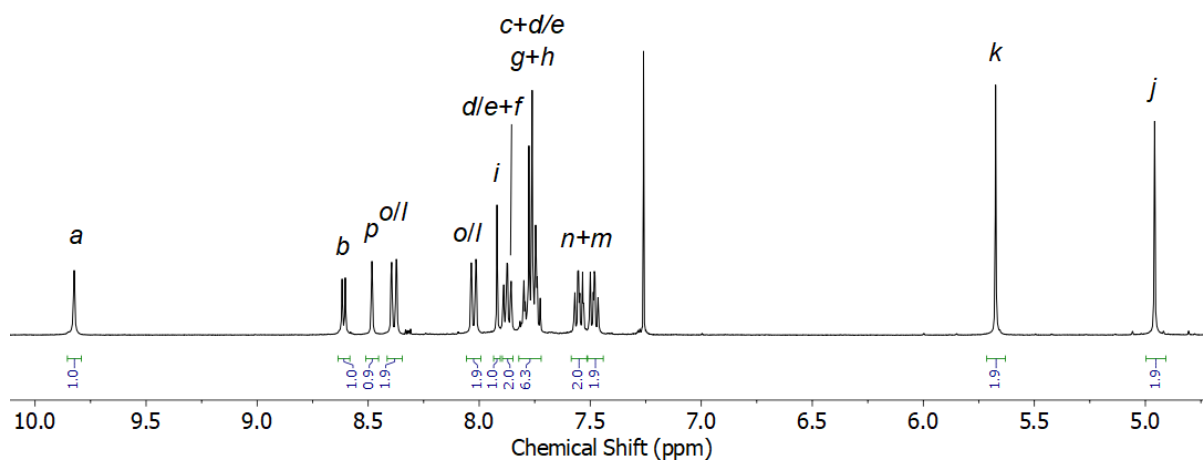

Figure S37 <sup>1</sup>H NMR (CDCl<sub>3</sub>, 400 MHz) of L<sup>Anth</sup>.

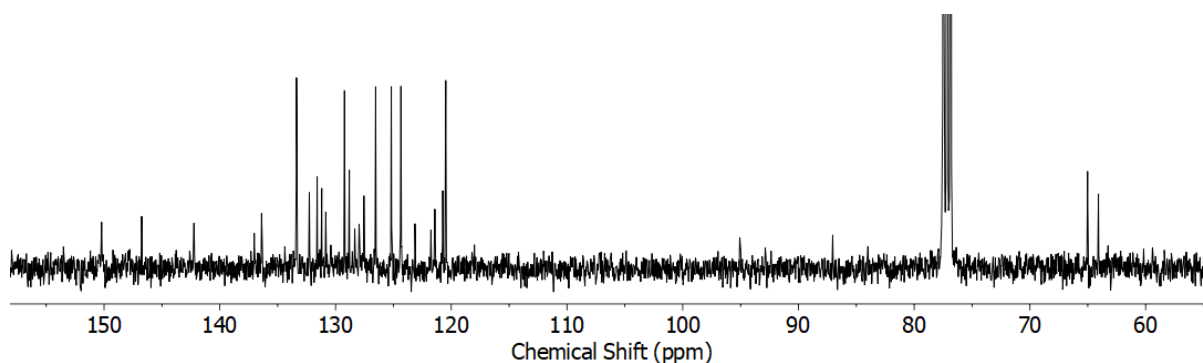

Figure S38 <sup>13</sup>C NMR (CDCl<sub>3</sub>, 101 MHz) of L<sup>Anth</sup>.

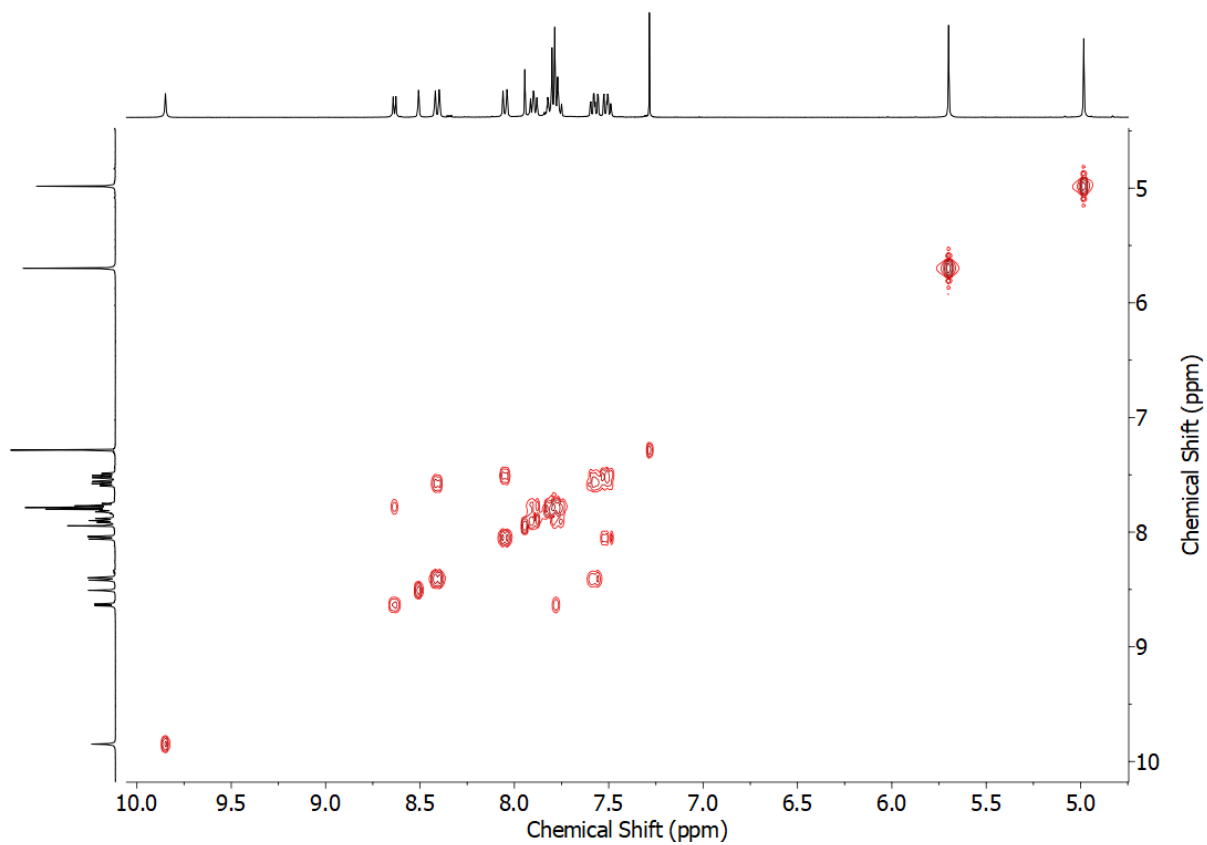

Figure S39 COSY NMR ( $\text{CDCl}_3$ ) of  $\text{L}^{\text{Anth}}$ .

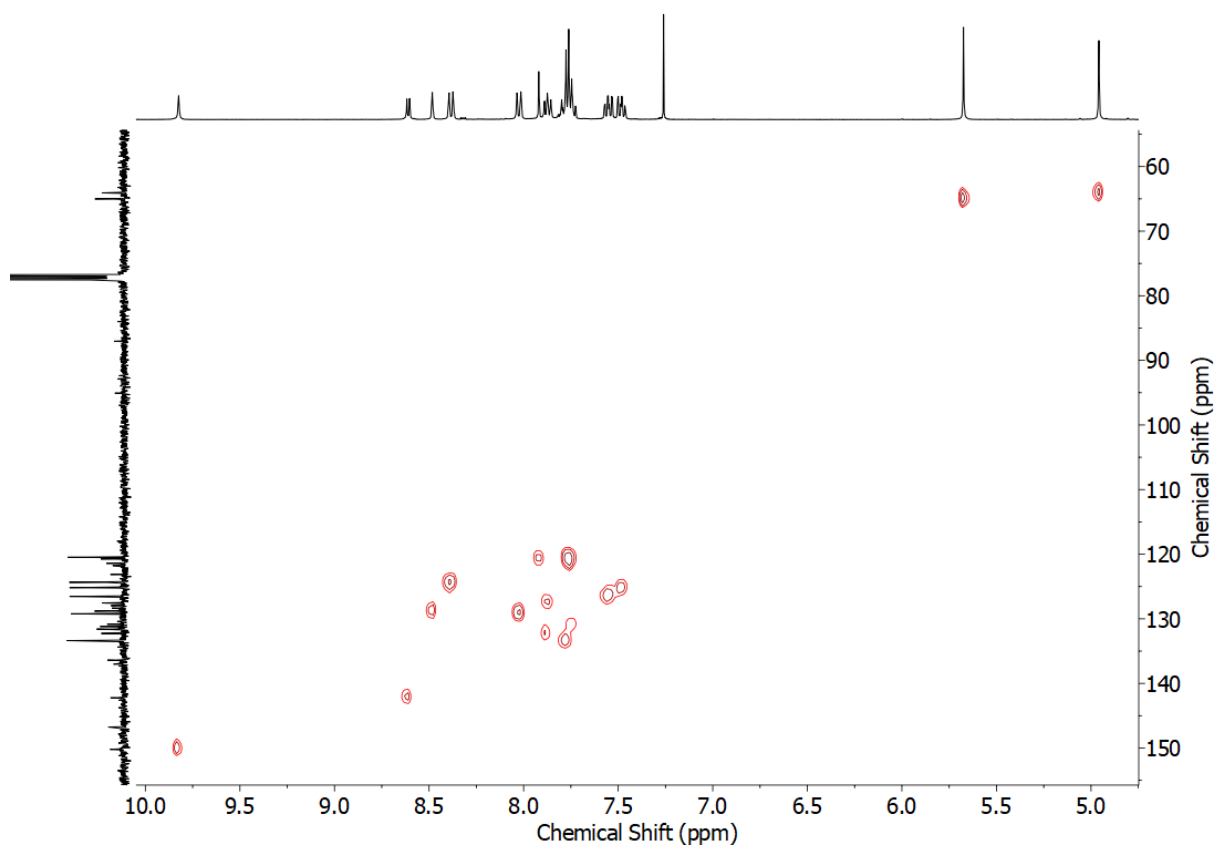

Figure S40 HSQC NMR ( $\text{CDCl}_3$ ) of  $\text{L}^{\text{Anth}}$ .

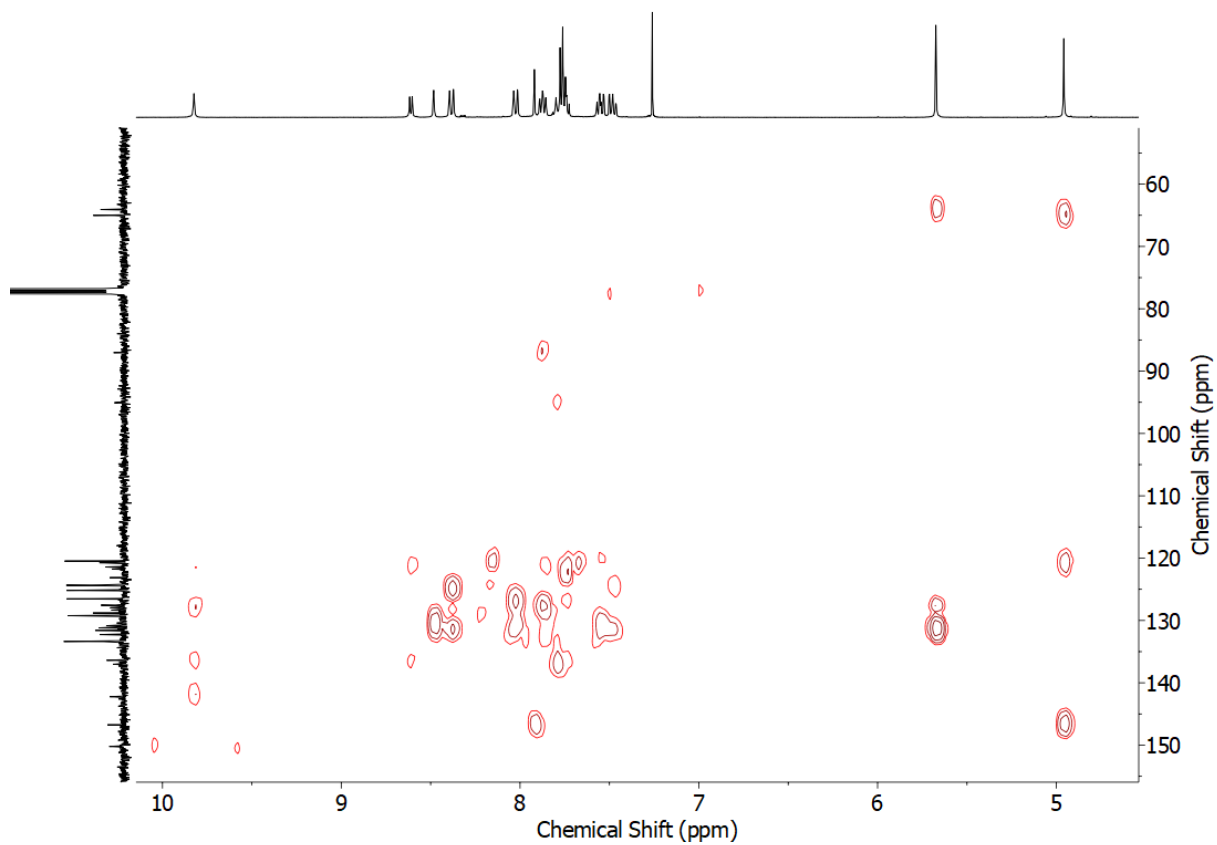

Figure S41 HMBC NMR (CDCl<sub>3</sub>) of L<sup>Anth</sup>.

### $[\text{Pd}_2(\text{L}^{\text{Bu}})_4](\text{BF}_4)_4$

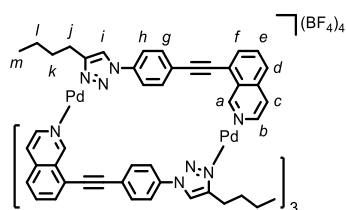

$\text{L}^{\text{Bu}}$  (10.6 mg, 0.030 mmol, 2.0 eq.) and  $[\text{Pd}(\text{CH}_3\text{CN})_4](\text{BF}_4)_2$  (6.7 mg, 0.015 mmol, 1.0 eq.) were sonicated in  $d_6$ -DMSO (0.75 mL) until all solids were dissolved, giving a light yellow solution. Quantitative conversion to  $[\text{Pd}_2(\text{L}^{\text{Bu}})_4](\text{BF}_4)_4$  was observed by  $^1\text{H}$  NMR.  $^1\text{H}$  NMR (500 MHz,  $d_6$ -DMSO)  $\delta$ : 10.30 (s, 4H,  $\text{H}_a$ ), 9.89 (d,  $J = 6.7$  Hz, 4H,  $\text{H}_b$ ), 9.06 (s, 4H,  $\text{H}_i$ ), 8.59 (d,  $J = 6.6$  Hz, 4H,  $\text{H}_c$ ), 8.30-8.21 (m, 20H,  $\text{H}_d$ ,  $\text{H}_g$ ,  $\text{H}_h$ ), 8.10-8.05 (m, 8H,  $\text{H}_e$ ,  $\text{H}_f$ ), 3.30 (m, 1H,  $\text{H}_j$ ), 2.95 (ddd,  $J = 15.2, 8.8, 6.0$  Hz, 1H,  $\text{H}_j'$ ), 1.49-1.41 (m, 1H,  $\text{H}_k$ ), 1.35-1.27 (m, 2H,  $\text{H}_l$ ), 1.25-1.17 (m, 1H,  $\text{H}_k'$ ), 0.82 (t,  $J = 7.3$  Hz, 12H,  $\text{H}_m$ ). Diffusion coefficient (500 MHz,  $d_6$ -DMSO)  $D$ :  $1.03 \times 10^{-10} \text{ m}^2\text{s}^{-1}$ .  $^{13}\text{C}$  NMR (126 MHz,  $d_6$ -DMSO)  $\delta$ : 155.0, 150.6, 142.9, 136.5, 136.0, 134.4, 133.4, 133.3, 128.2, 127.5, 125.0, 124.1, 123.0, 120.4, 120.3, 96.0, 86.6, 30.0, 24.8, 21.4, 13.7. ESI-MS  $m/z = 405.12$   $\{[\text{Pd}_2(\text{L}^{\text{Bu}})_4]\}^{4+}$  calc. 405.12; 569.17  $\{[\text{Pd}_2(\text{L}^{\text{Bu}})_4](\text{BF}_4)\}^{3+}$  calc. 569.16; 897.26  $\{[\text{Pd}_2(\text{L}^{\text{Bu}})_4](\text{BF}_4)_2\}^{2+}$  calc. 897.24; 1881.51  $\{[\text{Pd}_2(\text{L}^{\text{Bu}})_4](\text{BF}_4)_3\}^+$  calc. 1881.49.

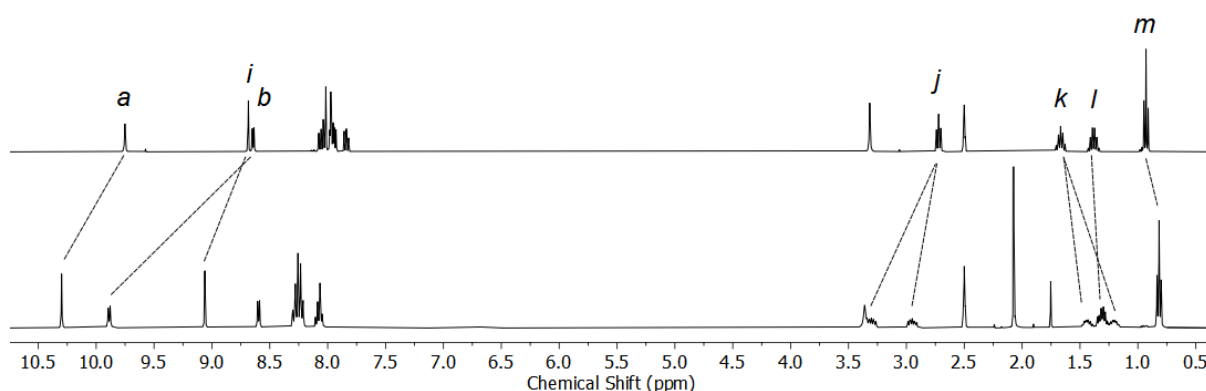

**Figure S42** Stacked  $^1\text{H}$  NMR spectra ( $d_6$ -DMSO, 400 MHz) of  $\text{L}^{\text{Bu}}$  (top) and  $[\text{Pd}_2(\text{L}^{\text{Bu}})_4](\text{BF}_4)_4$  (bottom).  $\Delta\delta$  (ppm):  $\text{H}_a$  0.50;  $\text{H}_b$  1.25;  $\text{H}_i$  0.37.

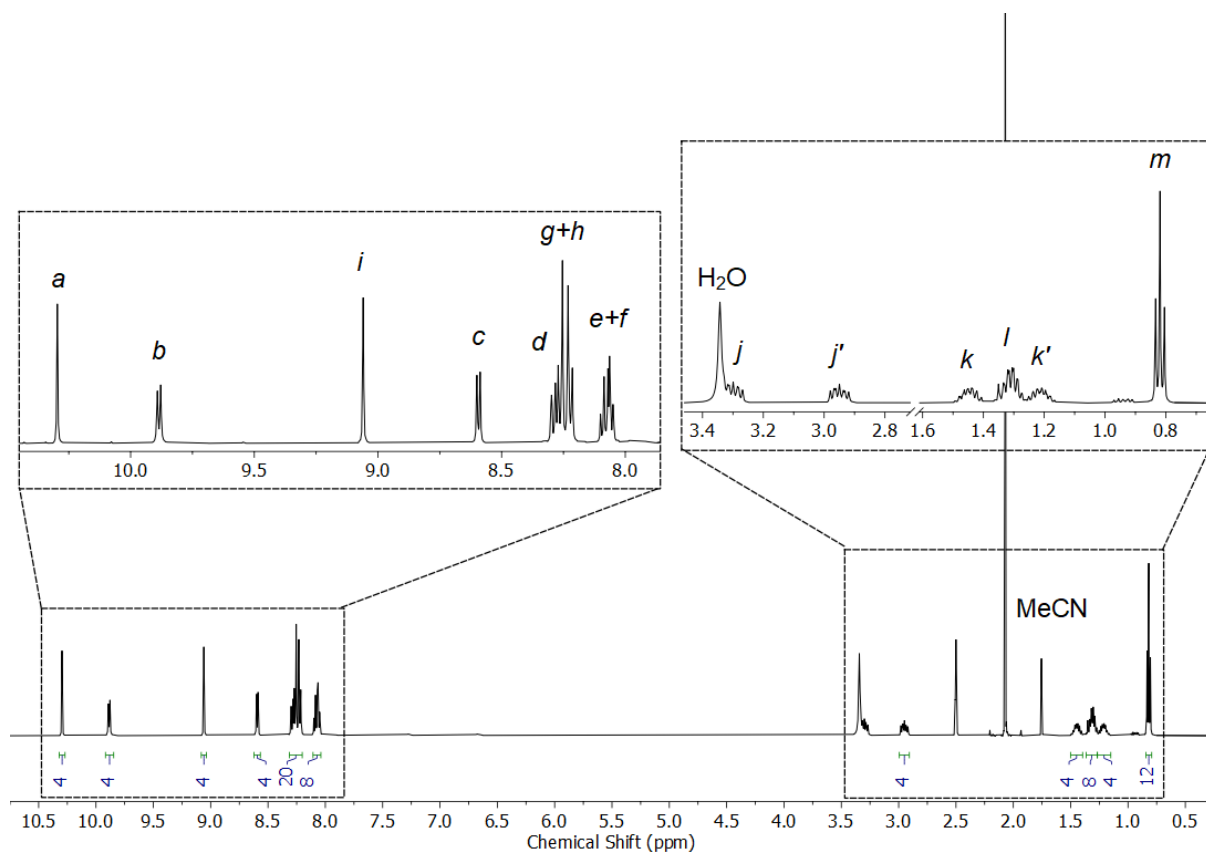

Figure S43  $^1\text{H}$  NMR ( $d_6$ -DMSO, 500 MHz) of  $[\text{Pd}_2(\text{L}^{\text{Bu}})_4](\text{BF}_4)_4$ .

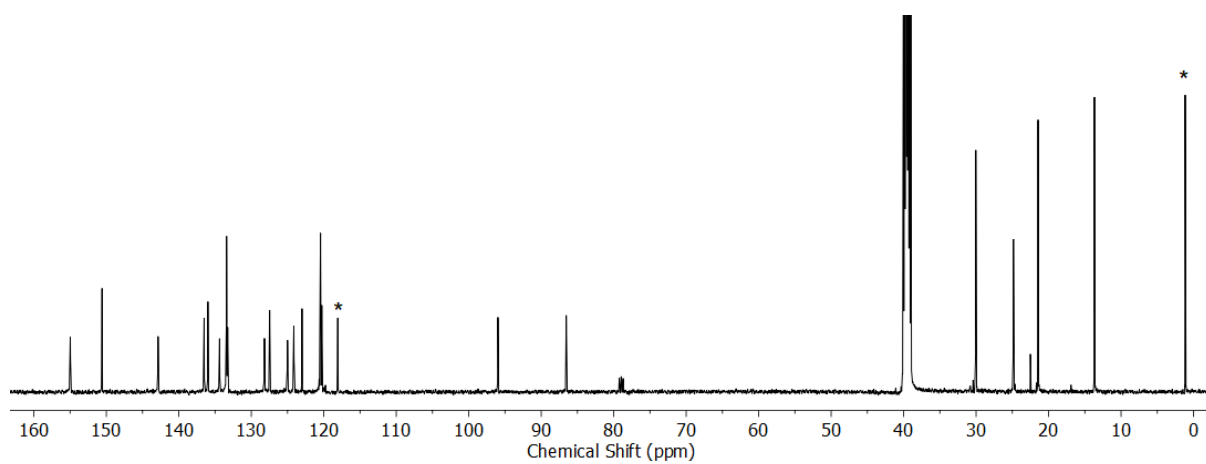

Figure S44  $^{13}\text{C}$  NMR ( $d_6$ -DMSO, 126 MHz) of  $[\text{Pd}_2(\text{L}^{\text{Bu}})_4](\text{BF}_4)_4$ .  $\text{CH}_3\text{CN}$  from the Pd(II) source is indicated (\*).

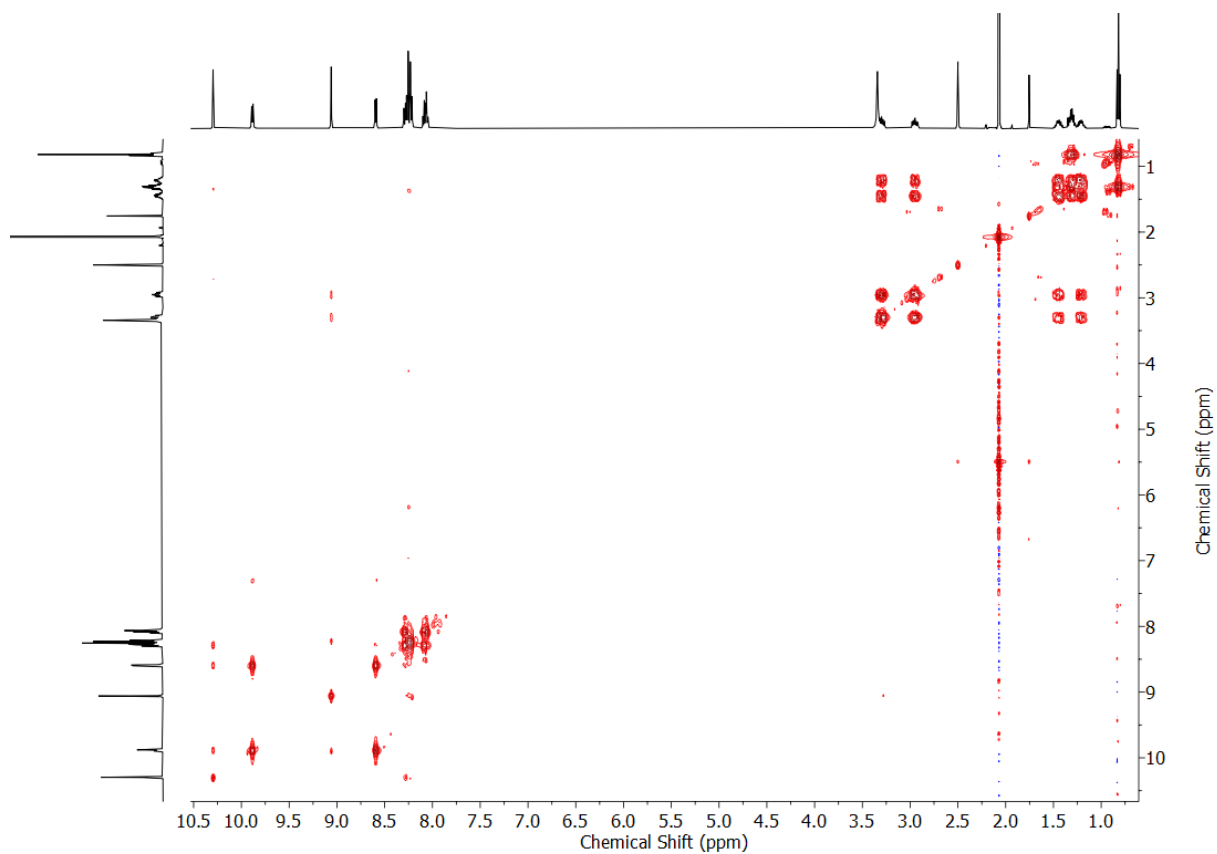

Figure S45 COSY NMR ( $d_6$ -DMSO) of  $[\text{Pd}_2(\text{L}^{\text{Bu}})_4](\text{BF}_4)_4$ .

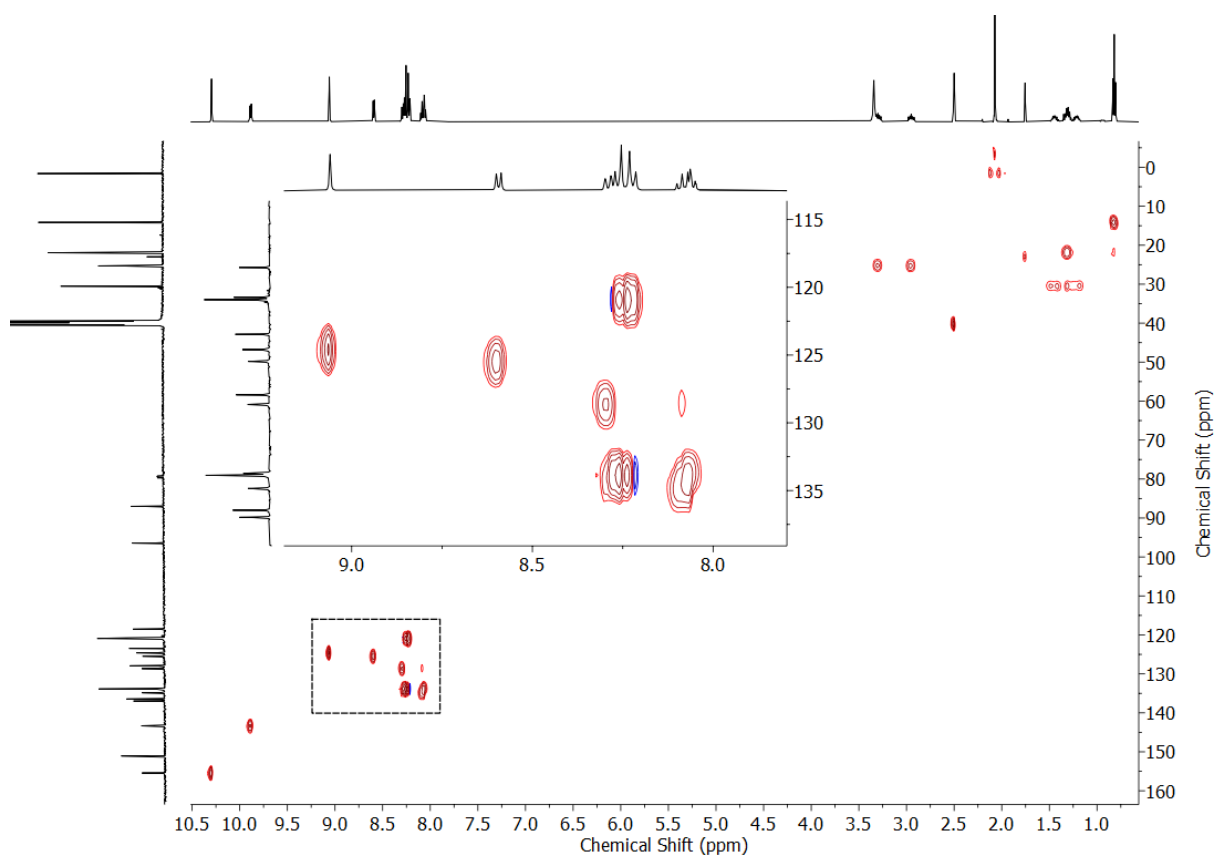

Figure S46 HSQC NMR ( $d_6$ -DMSO) of  $[\text{Pd}_2(\text{L}^{\text{Bu}})_4](\text{BF}_4)_4$ .



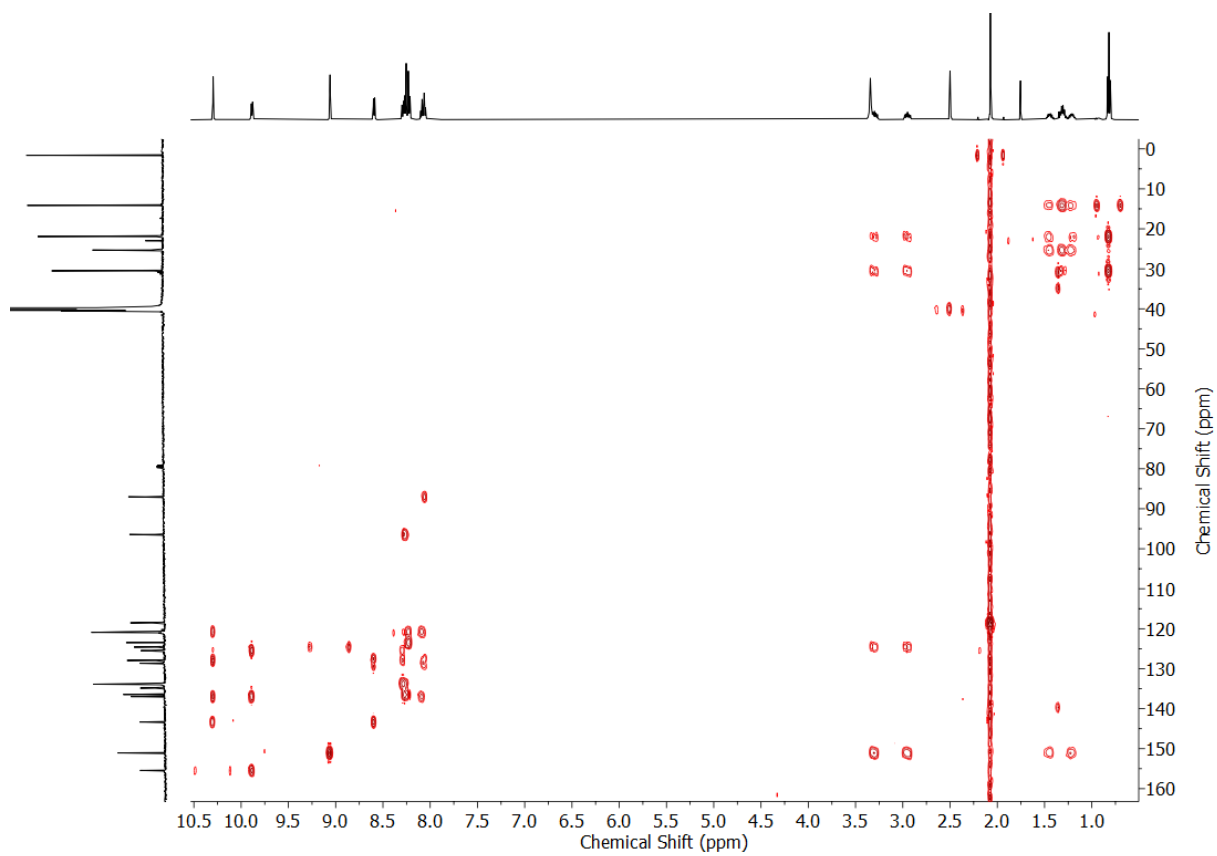

Figure S47 HMBC NMR ( $d_6$ -DMSO) of  $[\text{Pd}_2(\text{L}^{\text{Bu}})_4](\text{BF}_4)_4$ .

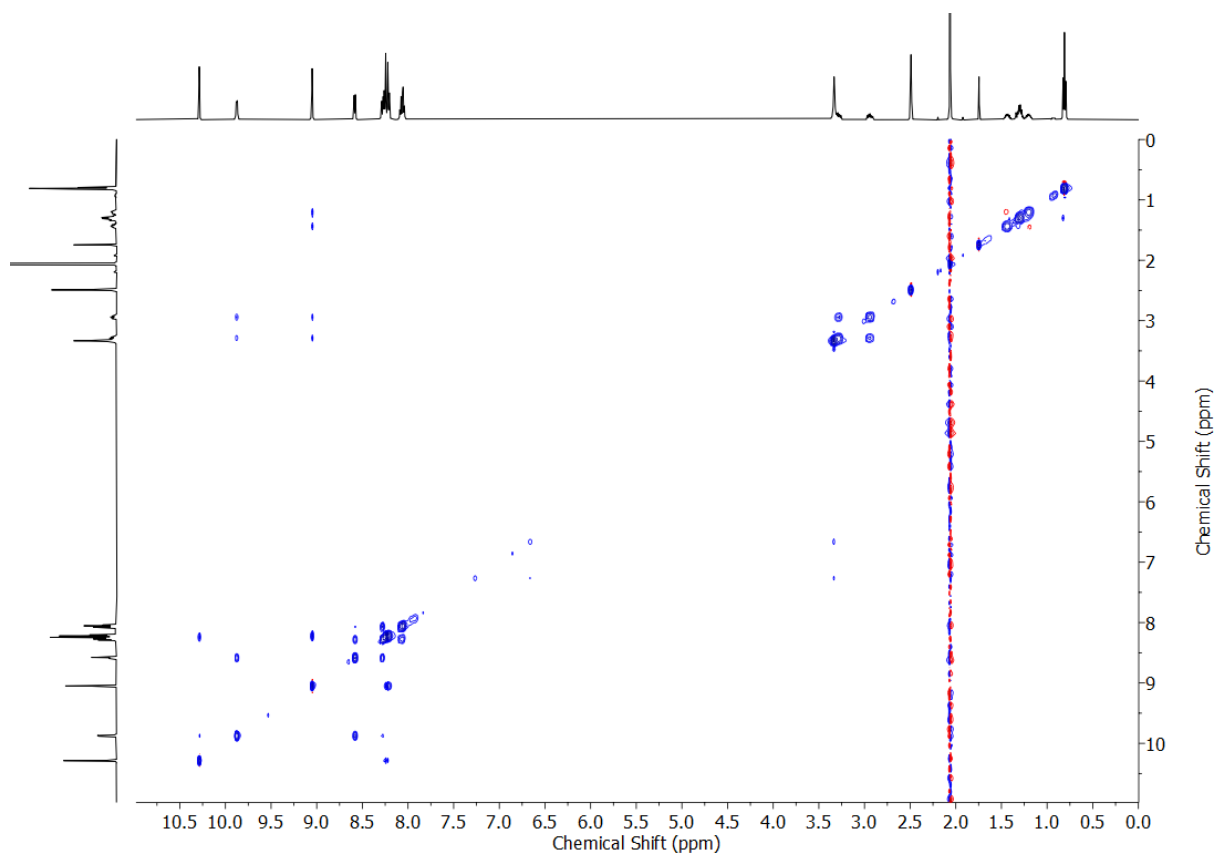

Figure S48 NOESY NMR ( $d_6$ -DMSO, 500 MHz) of  $[\text{Pd}_2(\text{L}^{\text{Bu}})_4](\text{BF}_4)_4$ .

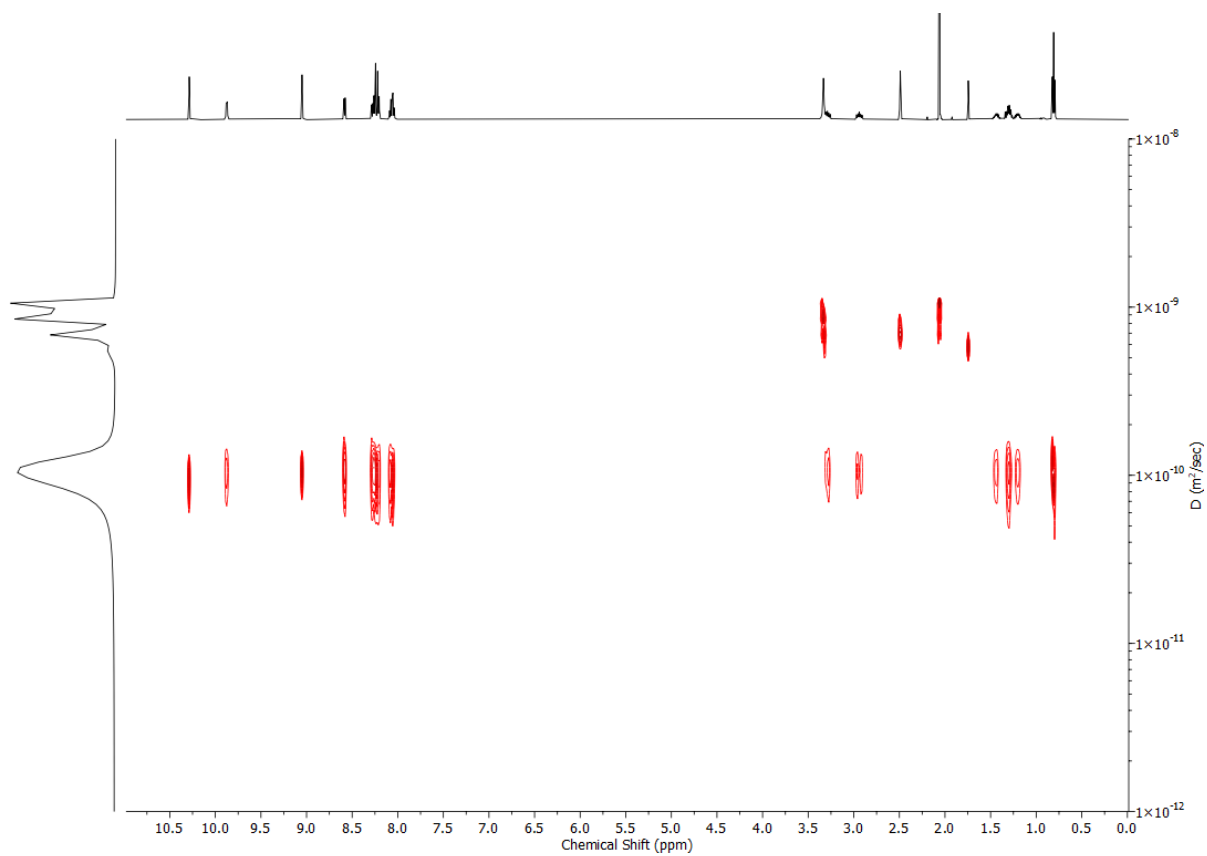

Figure S49 DOSY NMR ( $d_6$ -DMSO, 500 MHz) of  $[\text{Pd}_2(\text{LBu})_4](\text{BF}_4)_4$ .

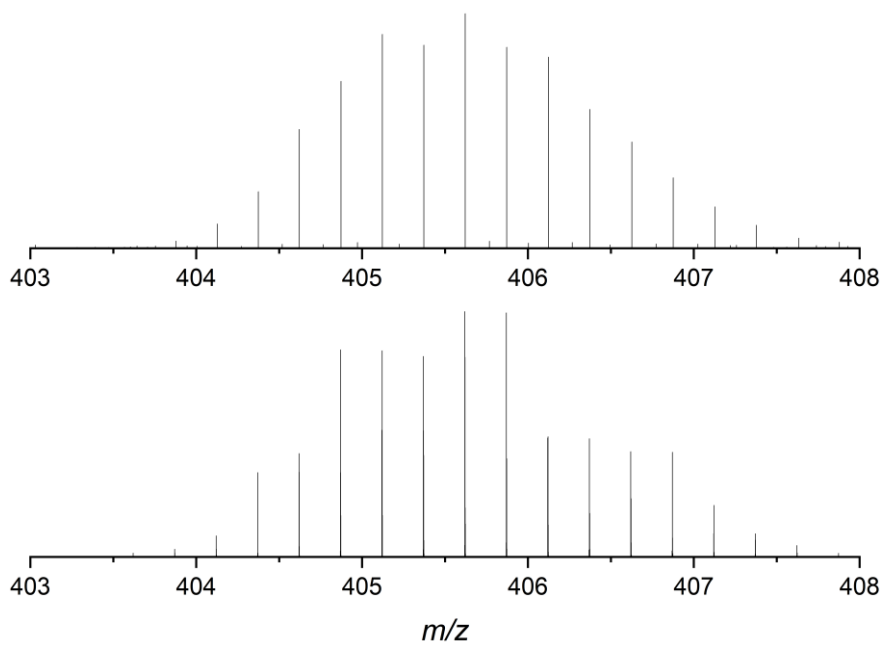

Figure S50 Observed (top) and calculated (bottom) isotopic patterns for  $\{[\text{Pd}_2(\text{LBu})_4]\}^{4+}$ .

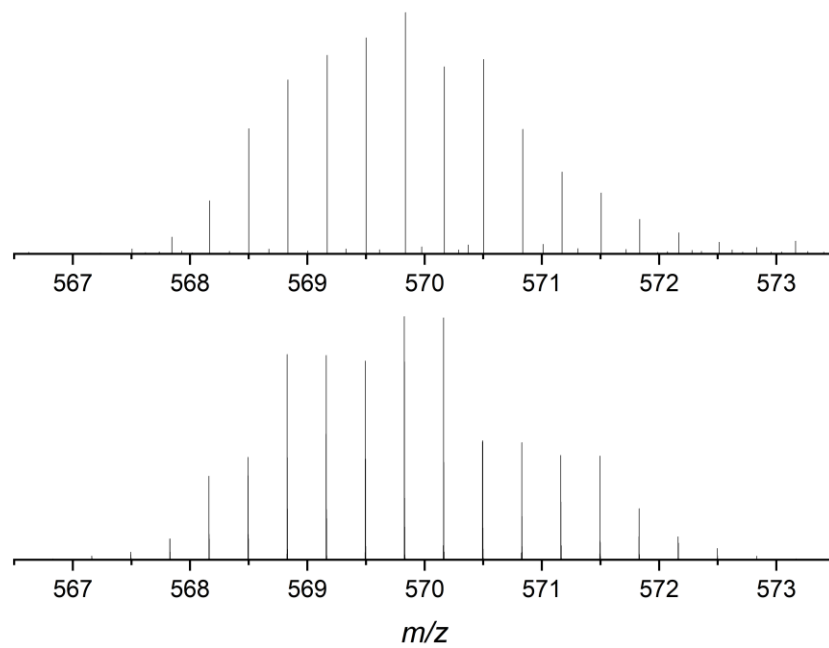

**Figure S51** Observed (top) and calculated (bottom) isotopic patterns for  $\{[\text{Pd}_2(\text{L}^{\text{Bu}})_4](\text{BF}_4)\}^{3+}$ .

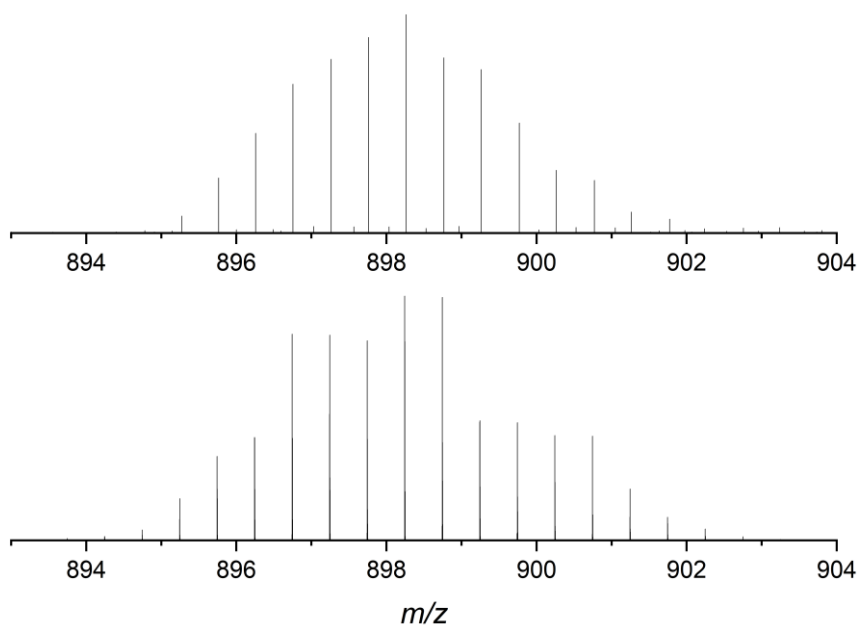

**Figure S52** Observed (top) and calculated (bottom) isotopic patterns for  $\{[\text{Pd}_2(\text{L}^{\text{Bu}})_4](\text{BF}_4)_2\}^{2+}$ .

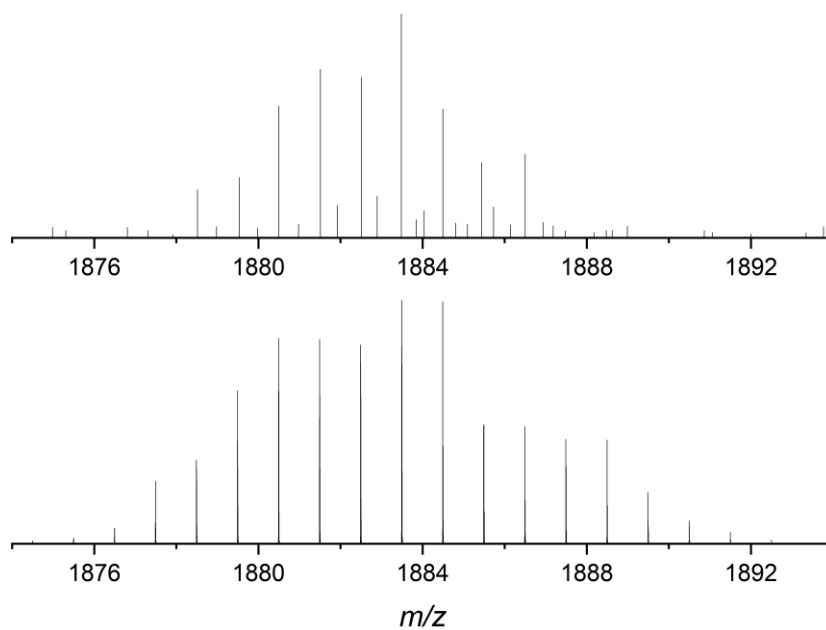

Figure S53 Observed (top) and calculated (bottom) isotopic patterns for  $\{[\text{Pd}_2(\text{L}^{\text{Bu}})_4](\text{BF}_4)_3\}^+$ .

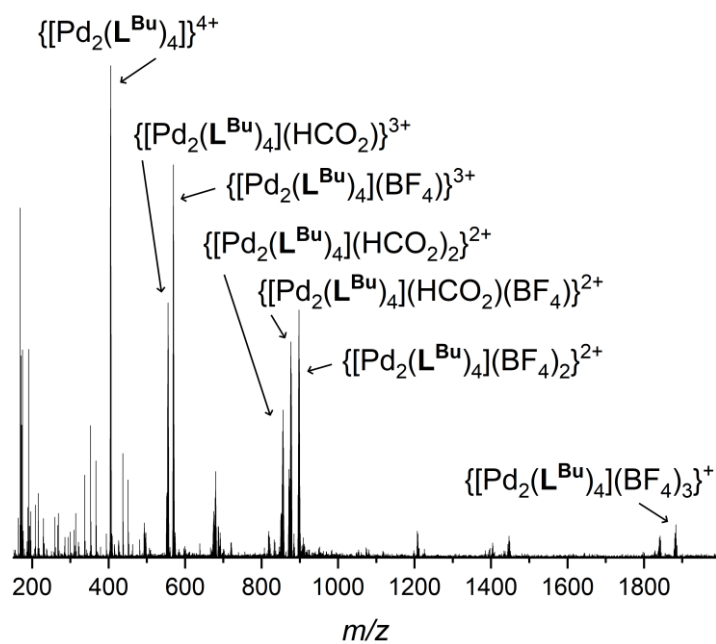

Figure S54 ESI-MS of  $[\text{Pd}_2(\text{L}^{\text{Bu}})_4](\text{BF}_4)_4$ .

### $[\text{Pd}_2(\text{L}^{\text{Bn}})_4](\text{BF}_4)_4$

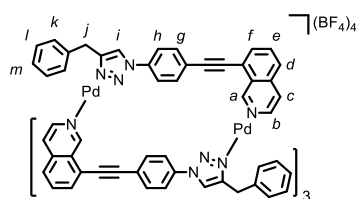

$\text{L}^{\text{Bn}}$  (11.6 mg, 0.030 mmol, 2.0 eq.) and  $[\text{Pd}(\text{CH}_3\text{CN})_4](\text{BF}_4)_2$  (6.7 mg, 0.015 mmol, 1.0 eq.) were sonicated in  $d_6$ -DMSO (0.75 mL) until all solids were dissolved, giving a light yellow solution. Quantitative conversion to  $[\text{Pd}_2(\text{L}^{\text{Bn}})_4](\text{BF}_4)_4$  was observed by  $^1\text{H}$  NMR.  $^1\text{H}$  NMR (400 MHz,  $d_6$ -DMSO)  $\delta$ : 10.31 (s, 4H,  $\text{H}_a$ ), 9.67 (d,  $J = 6.7$  Hz, 4H,  $\text{H}_b$ ), 9.05 (s, 4H,  $\text{H}_i$ ), 8.33–8.27 (m, 20H,  $\text{H}_c$ ,  $\text{H}_h$ ,  $\text{H}_g$ ), 8.22–8.18 (m, 4H,  $\text{H}_d$ ), 8.08–8.04 (m, 8H,  $\text{H}_e$ ,  $\text{H}_f$ ), 7.16 (t,  $J = 7.3$  Hz, 4H,  $\text{H}_m$ ), 7.08 (app. t,  $J = 7.4$  Hz, 8H,  $\text{H}_l$ ), 6.89 (d,  $J = 6.8$  Hz, 8H,  $\text{H}_k$ ), 4.71 (d,  $J = 16.9$  Hz, 4H,  $\text{H}_j$ ), 4.61 (d,  $J = 16.8$  Hz, 4H,  $\text{H}_{j'}$ ). Diffusion coefficient (500 MHz,  $d_6$ -DMSO)  $D$ :  $9.53 \times 10^{-11} \text{ m}^2\text{s}^{-1}$ .  $^{13}\text{C}$  NMR (101 MHz,  $d_6$ -DMSO)  $\delta$ : 154.8, 149.0, 142.6, 136.4, 136.3, 136.0, 134.2, 133.3, 133.2, 128.4, 128.2, 127.9, 127.4, 126.9, 125.3, 125.0, 123.1, 120.6, 120.2, 96.0, 86.7, 30.6. ESI-MS  $m/z = 439.11$   $\{[\text{Pd}_2(\text{L}^{\text{Bn}})_4]\}^{4+}$  calc. 439.10; 614.49  $\{[\text{Pd}_2(\text{L}^{\text{Bn}})_4](\text{BF}_4)\}^{3+}$  calc. 614.47; 965.23  $\{[\text{Pd}_2(\text{L}^{\text{Bn}})_4](\text{BF}_4)_2\}^{2+}$  calc. 965.21.

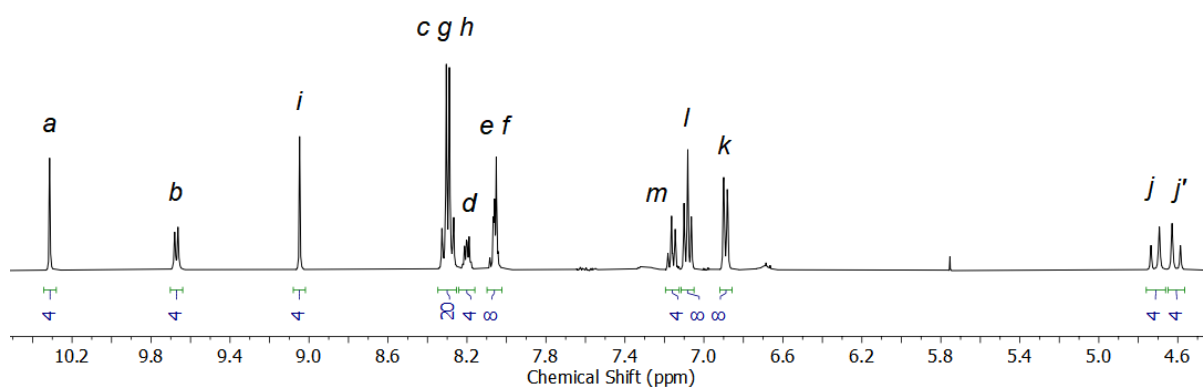

Figure S55  $^1\text{H}$  NMR ( $d_6$ -DMSO, 400 MHz) of  $[\text{Pd}_2(\text{L}^{\text{Bn}})_4](\text{BF}_4)_4$ .

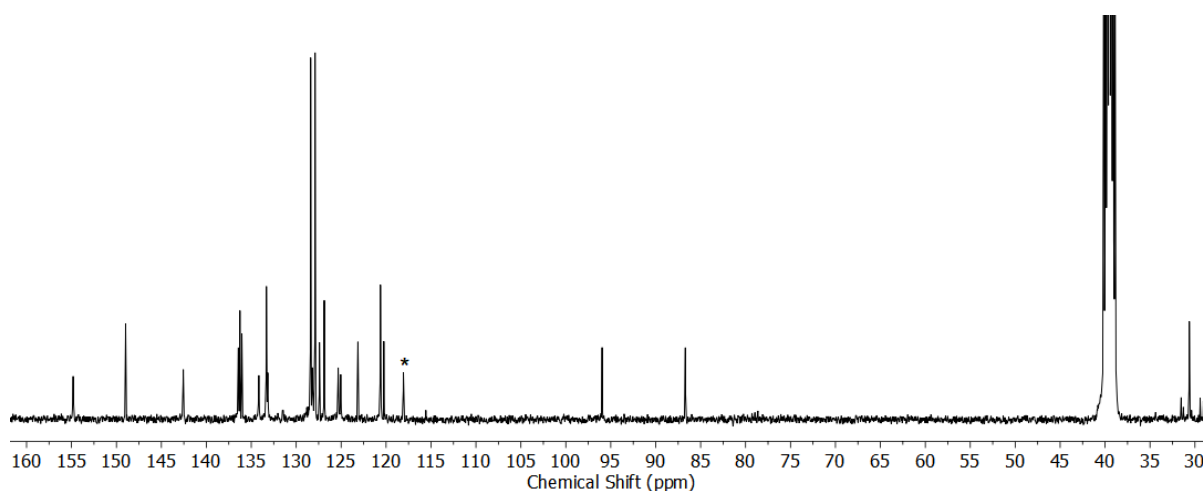

Figure S56  $^{13}\text{C}$  NMR ( $d_6$ -DMSO, 101 MHz) of  $[\text{Pd}_2(\text{L}^{\text{Bn}})_4](\text{BF}_4)_4$ .  $\text{CH}_3\text{CN}$  from the Pd(II) source is indicated (\*).

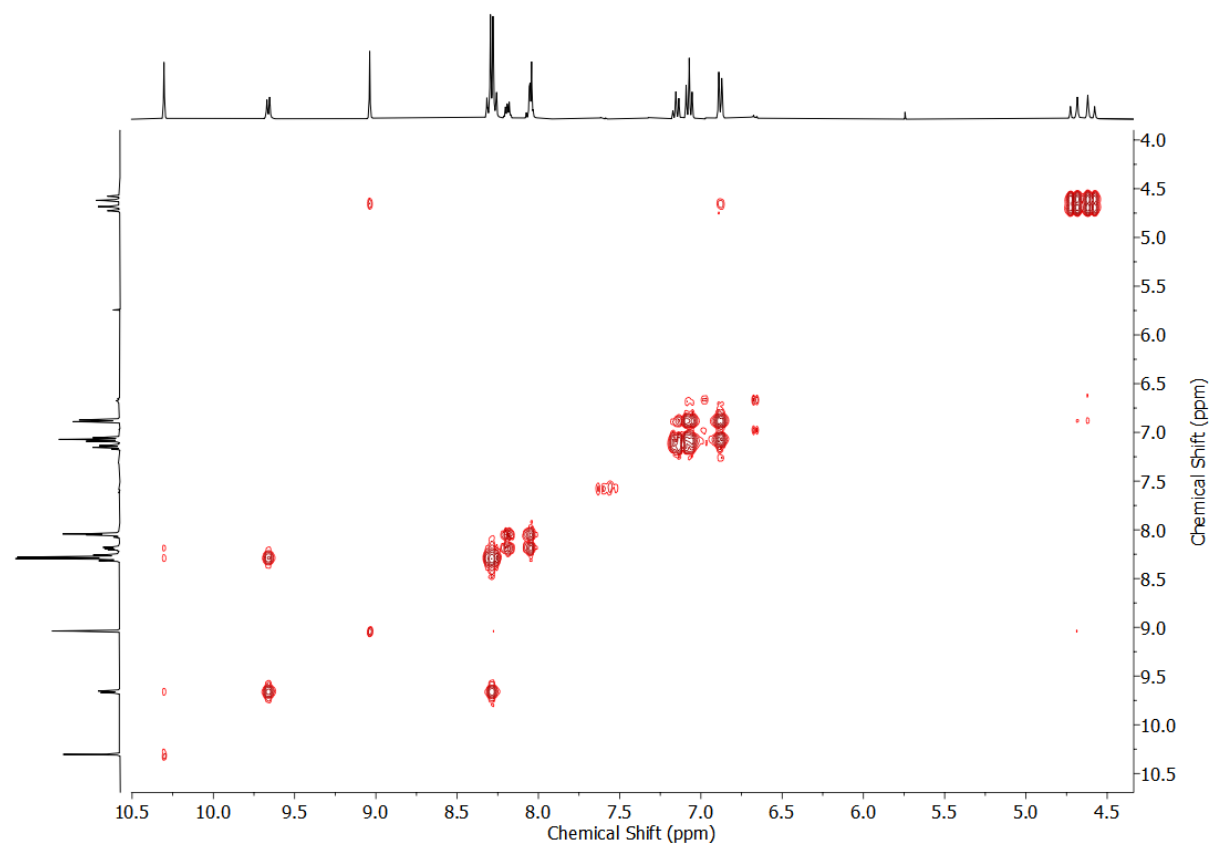

Figure S57 COSY NMR ( $d_6$ -DMSO) of  $[\text{Pd}_2(\text{L}^{\text{Bn}})_4](\text{BF}_4)_4$ .

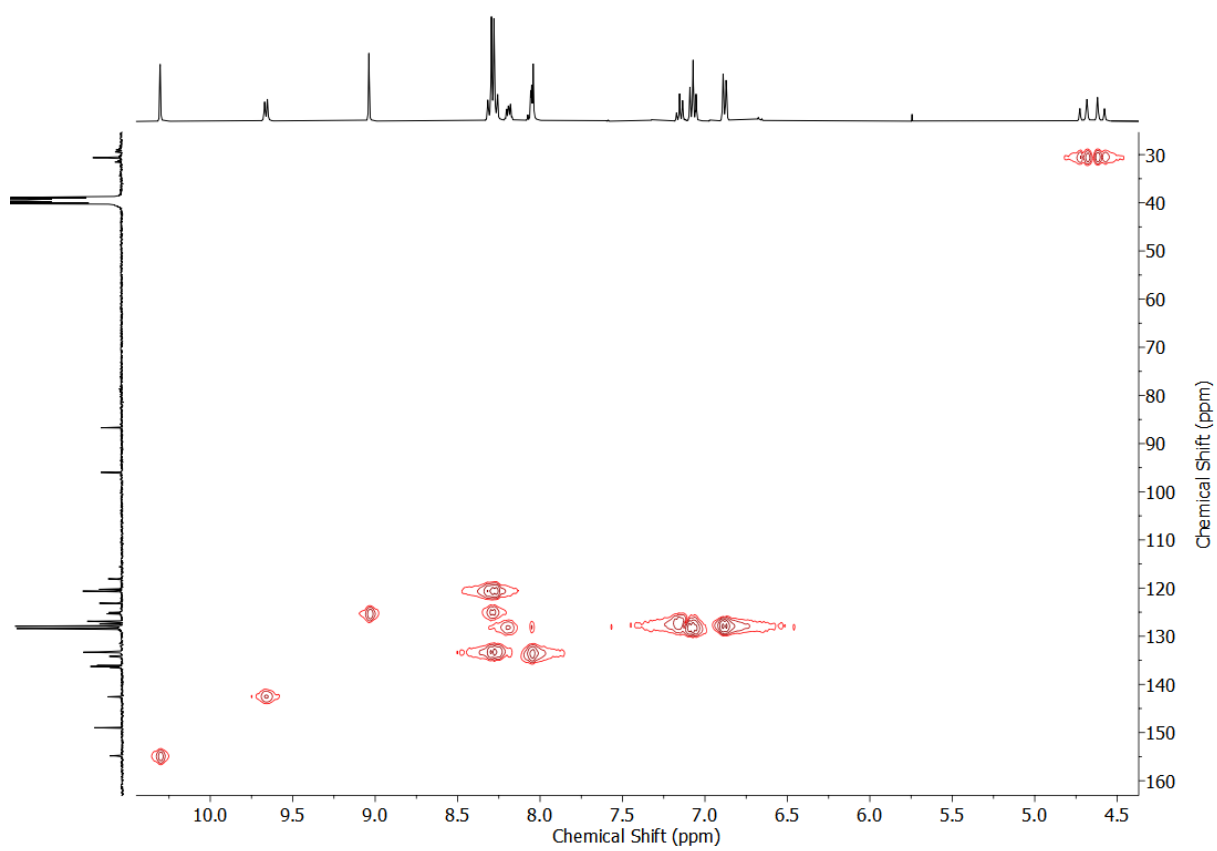

Figure S58 HSQC NMR ( $d_6$ -DMSO) of  $[\text{Pd}_2(\text{L}^{\text{Bn}})_4](\text{BF}_4)_4$ .

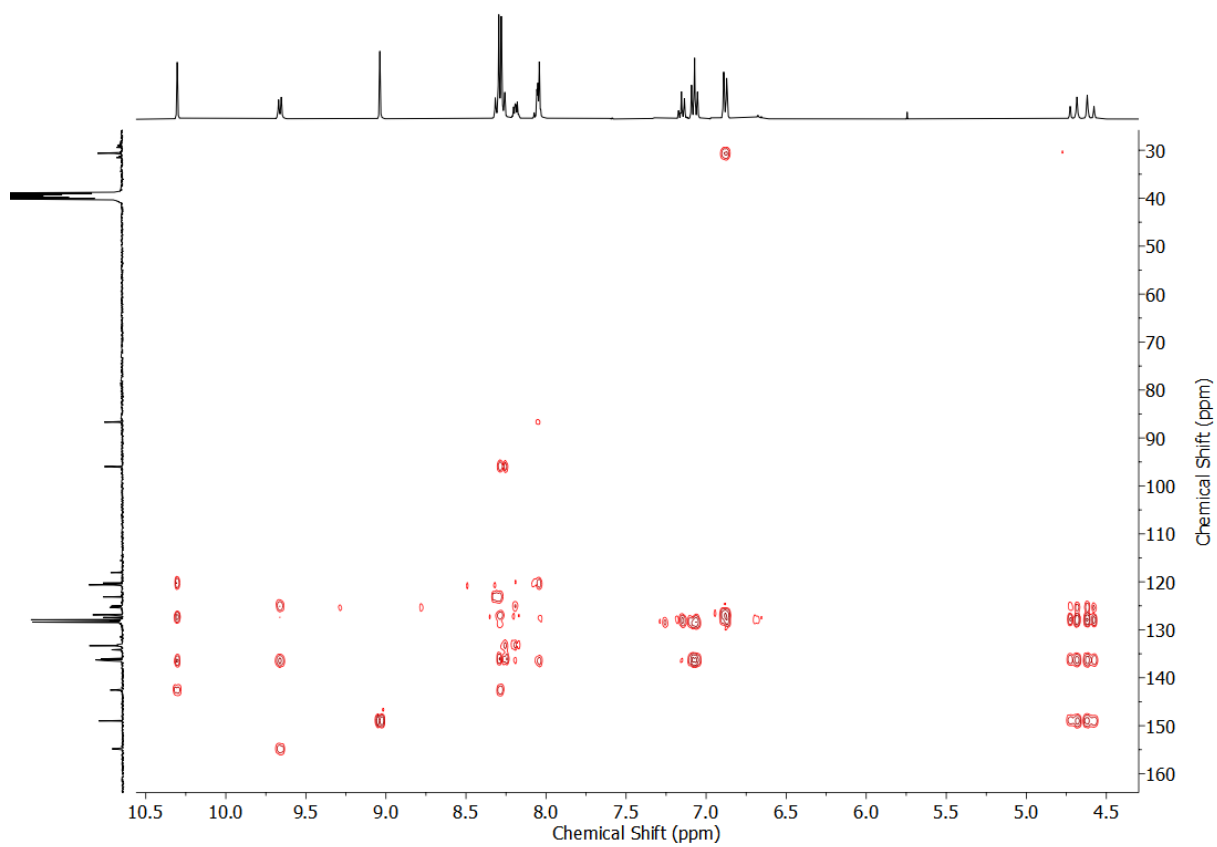

Figure S59 HMBC NMR ( $d_6$ -DMSO) of  $[\text{Pd}_2(\text{L}^{\text{Bn}})_4](\text{BF}_4)_4$ .

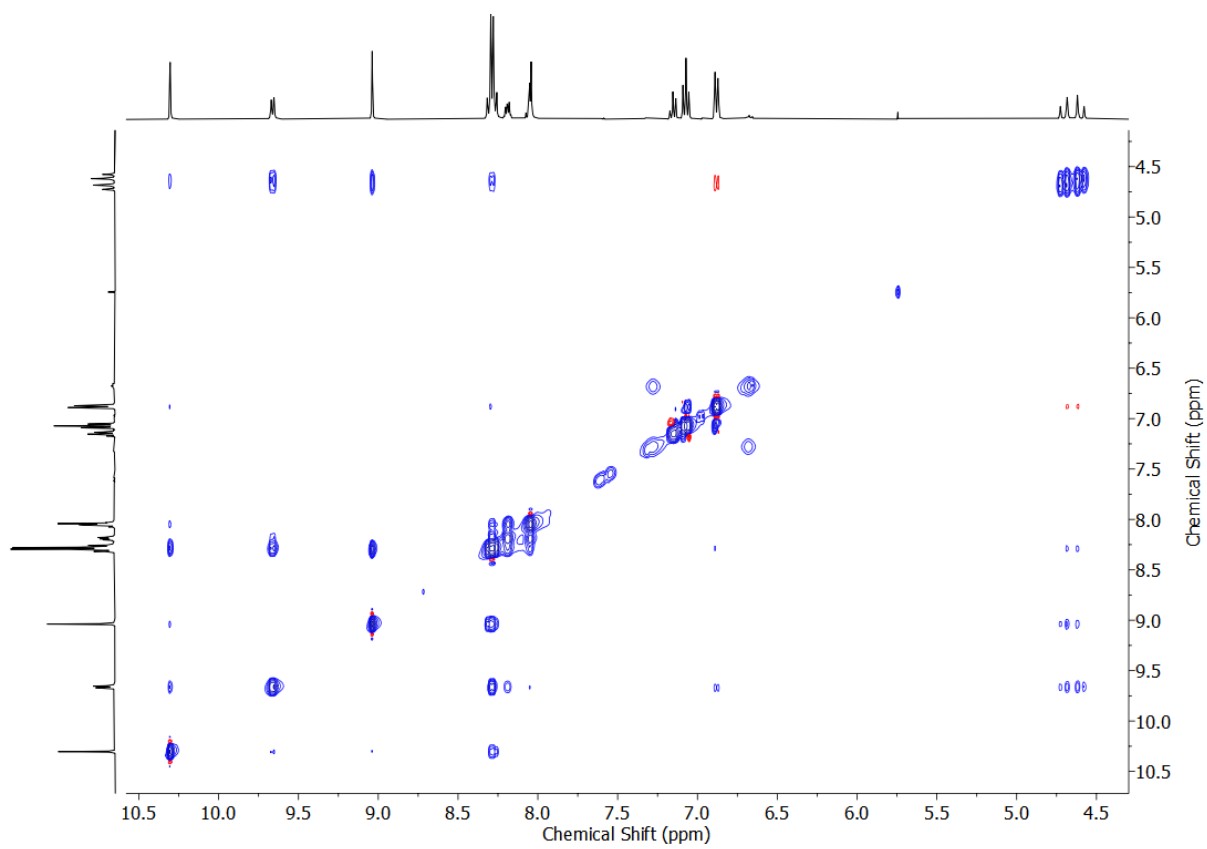

Figure S60 NOESY NMR ( $d_6$ -DMSO, 400 MHz) of  $[\text{Pd}_2(\text{L}^{\text{Bn}})_4](\text{BF}_4)_4$ .

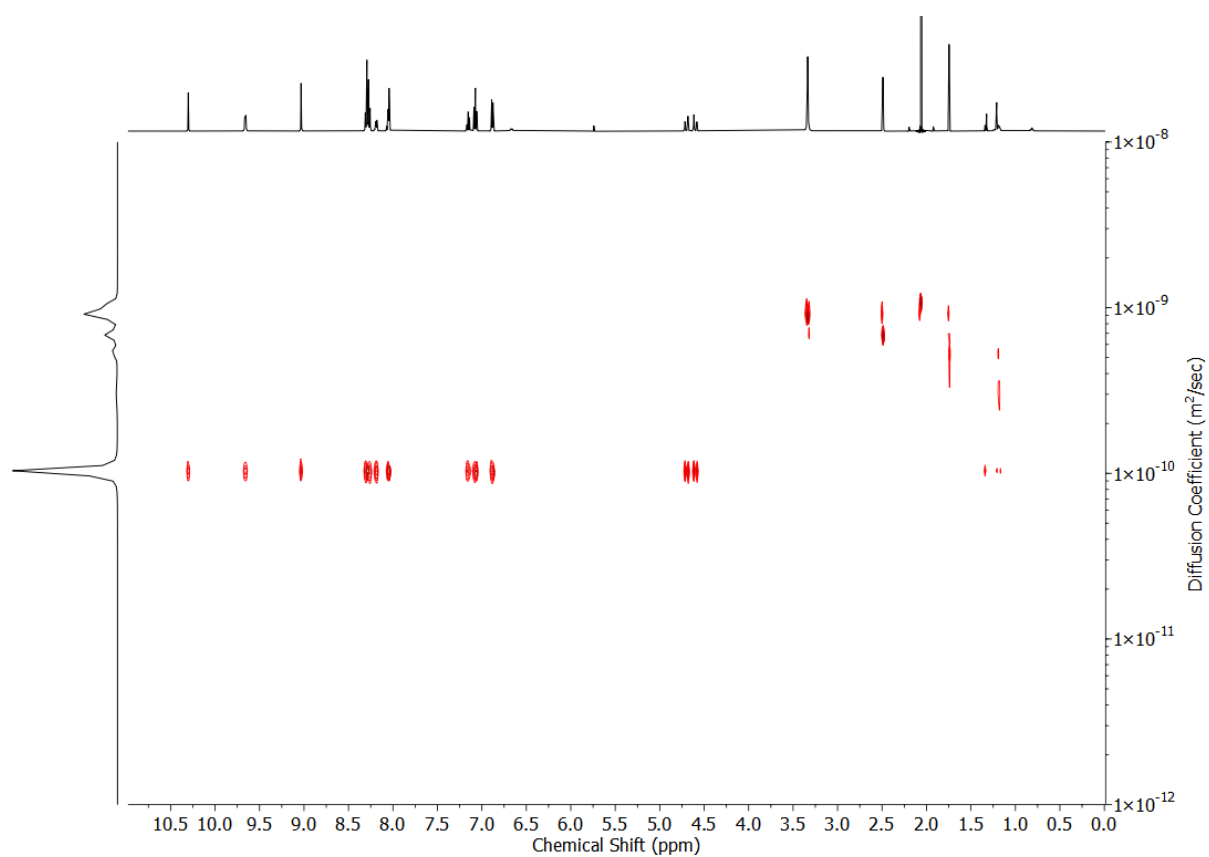

**Figure S61** DOSY NMR ( $d_6$ -DMSO, 500 MHz) of  $[\text{Pd}_2(\text{L}^{\text{Bn}})_4](\text{BF}_4)_4$ .

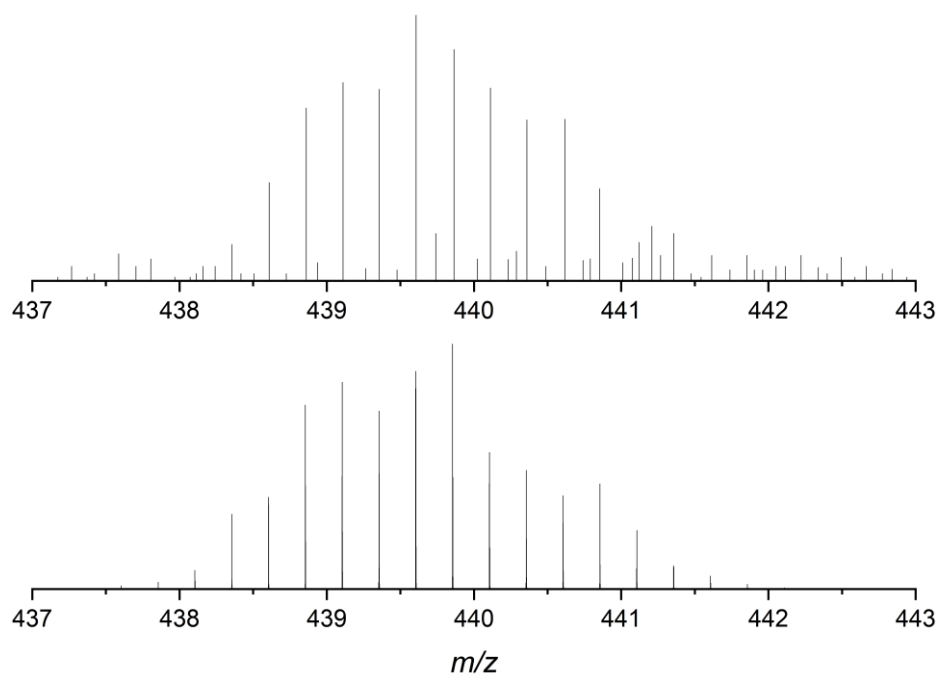

**Figure S62** Observed (top) and calculated (bottom) isotopic patterns for  $[\text{Pd}_2(\text{L}^{\text{Bn}})_4]^{4+}$ .



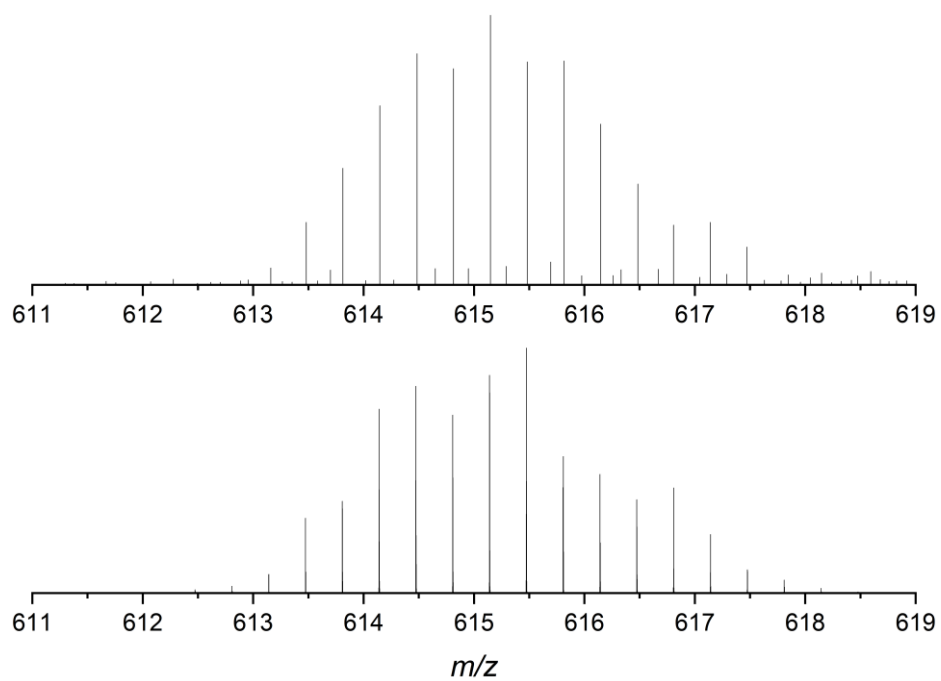

**Figure S63** Observed (top) and calculated (bottom) isotopic patterns for  $\{[\text{Pd}_2(\text{L}^{\text{Bn}})_4](\text{BF}_4)_3\}^{3+}$ .

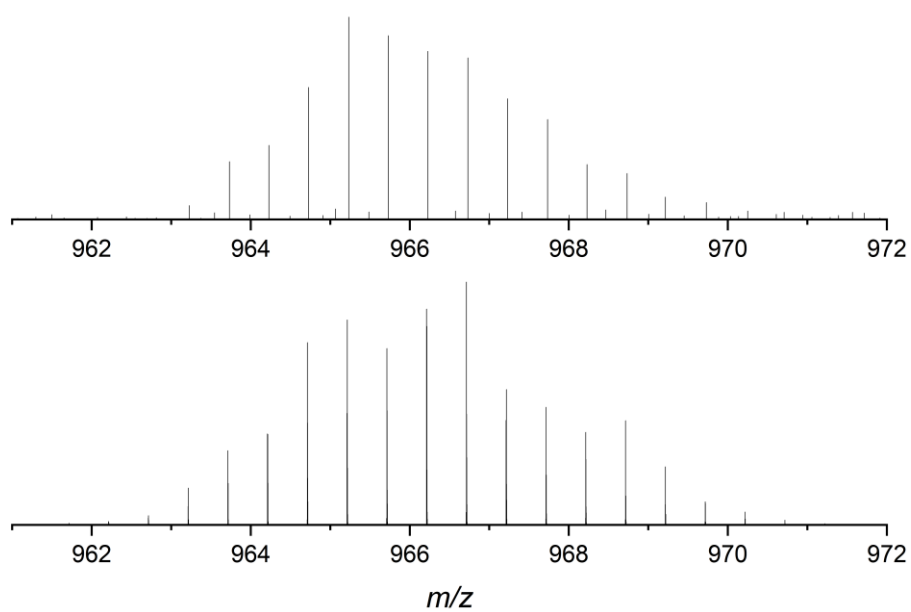

**Figure S64** Observed (top) and calculated (bottom) isotopic patterns for  $\{[\text{Pd}_2(\text{L}^{\text{Bn}})_4](\text{BF}_4)_2\}^{2+}$ .

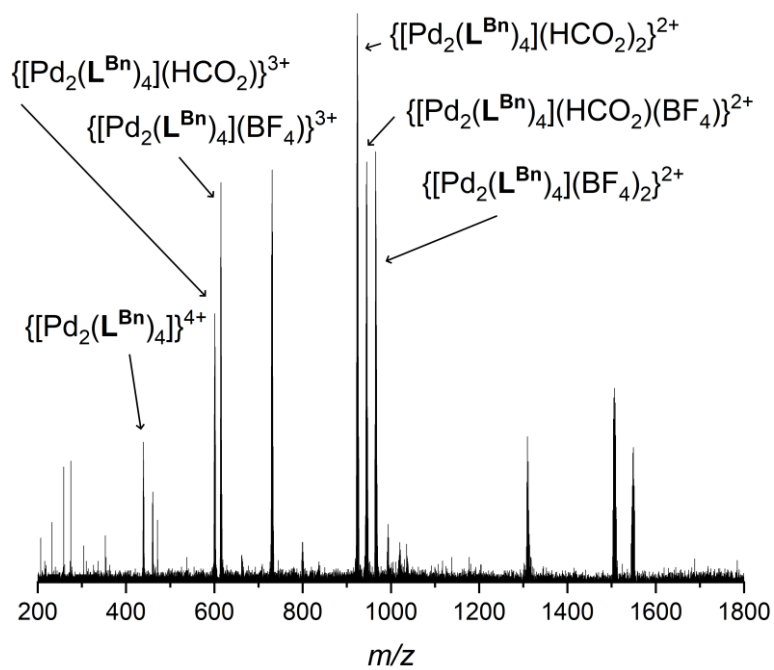

Figure S65 ESI-MS of  $[Pd_2(L^{Bn})_4](BF_4)_4$ .

**[Pd<sub>2</sub>(L<sup>OH</sup>)<sub>4</sub>](BF<sub>4</sub>)<sub>4</sub>**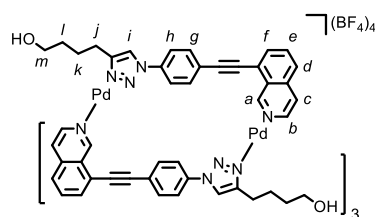

**L<sup>OH</sup>** (11.1 mg, 0.030 mmol, 2.0 eq.) and [Pd(CH<sub>3</sub>CN)<sub>4</sub>](BF<sub>4</sub>)<sub>2</sub> (6.7 mg, 0.015 mmol, 1.0 eq.) were sonicated in *d*<sub>6</sub>-DMSO (0.75 mL) until all solids were dissolved, giving a light yellow solution. Quantitative conversion to [Pd<sub>2</sub>(L<sup>OH</sup>)<sub>4</sub>](BF<sub>4</sub>)<sub>4</sub> was observed by <sup>1</sup>H NMR. <sup>1</sup>H NMR (400 MHz, *d*<sub>6</sub>-DMSO) δ: 10.29 (s, 4H, H<sub>a</sub>), 9.87 (d, *J* = 6.7 Hz, 4H, H<sub>b</sub>), 9.07 (s, 4H, H<sub>i</sub>), 8.58 (d, *J* = 6.5 Hz, 4H, H<sub>c</sub>), 8.29-8.22 (m, 20H, H<sub>d</sub>/H<sub>e</sub>, H<sub>g</sub>, H<sub>h</sub>), 8.12-8.04 (m, 8H, H<sub>d</sub>/H<sub>e</sub>, H<sub>j</sub>), 4.45 (br. s, 4H, H<sub>OH</sub>), 3.30 (m, 12H, H<sub>j</sub>, H<sub>m</sub>), 3.01-2.94 (m, 4H, H<sub>j'</sub>), 1.60-1.51 (m, 4H, H<sub>k</sub>), 1.48-1.41 (m, 8H, H<sub>l</sub>), 1.31-1.21 (m, 4H, H<sub>k'</sub>). Diffusion coefficient (500 MHz, *d*<sub>6</sub>-DMSO) *D*: 9.64 × 10<sup>-11</sup> m<sup>2</sup>s<sup>-1</sup>. <sup>13</sup>C NMR (101 MHz, *d*<sub>6</sub>-DMSO) δ: 154.9, 150.7, 142.8, 136.5, 136.0, 134.3, 133.4, 133.3, 128.2, 127.5, 125.1, 124.1, 123.0, 120.4, 120.3, 95.9, 86.6, 60.1, 31.4, 24.9, 24.7. ESI-MS *m/z* = 421.12 {[Pd<sub>2</sub>(L<sup>OH</sup>)<sub>4</sub>]}<sup>4+</sup> calc. 421.11; 576.49 {[Pd<sub>2</sub>(L<sup>OH</sup>)<sub>4</sub>](HCO<sub>2</sub>)<sub>2</sub>}<sup>3+</sup> calc. 576.49; 887.24 {[Pd<sub>2</sub>(L<sup>OH</sup>)<sub>4</sub>](HCO<sub>2</sub>)<sub>2</sub>}<sup>2+</sup> calc. 887.23.

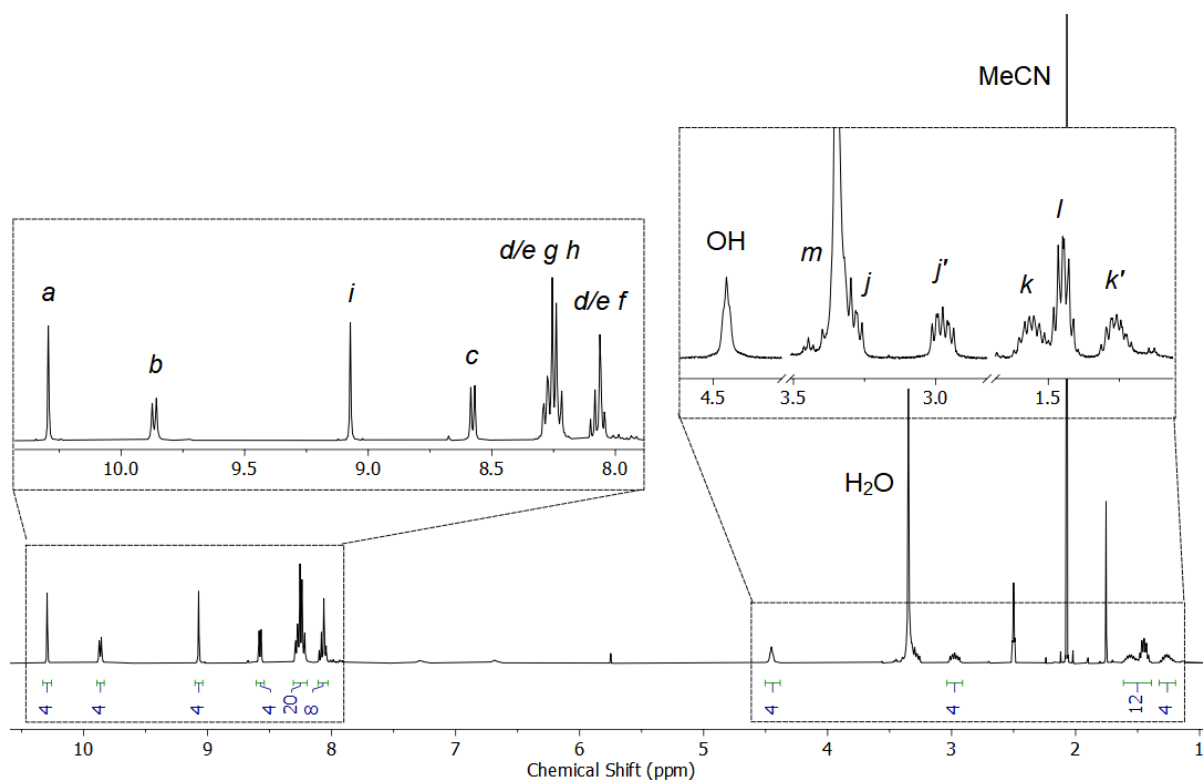

**Figure S66** <sup>1</sup>H NMR (*d*<sub>6</sub>-DMSO, 400 MHz) of [Pd<sub>2</sub>(L<sup>OH</sup>)<sub>4</sub>](BF<sub>4</sub>)<sub>4</sub>.

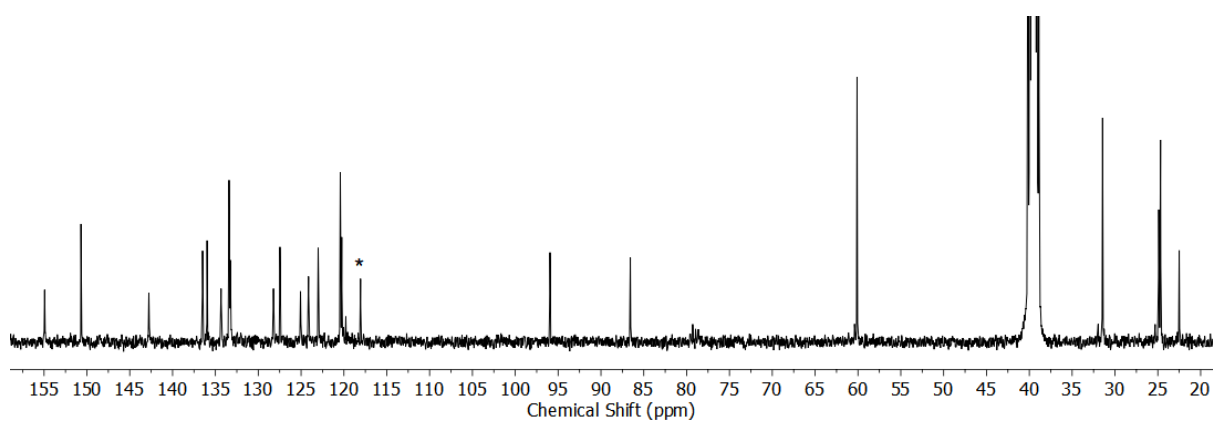

**Figure S67**  $^{13}\text{C}$  NMR ( $d_6$ -DMSO, 101 MHz) of  $[\text{Pd}_2(\text{L}^{\text{OH}})_4](\text{BF}_4)_4$ .  $\text{CH}_3\text{CN}$  from the Pd(II) source is indicated (\*).

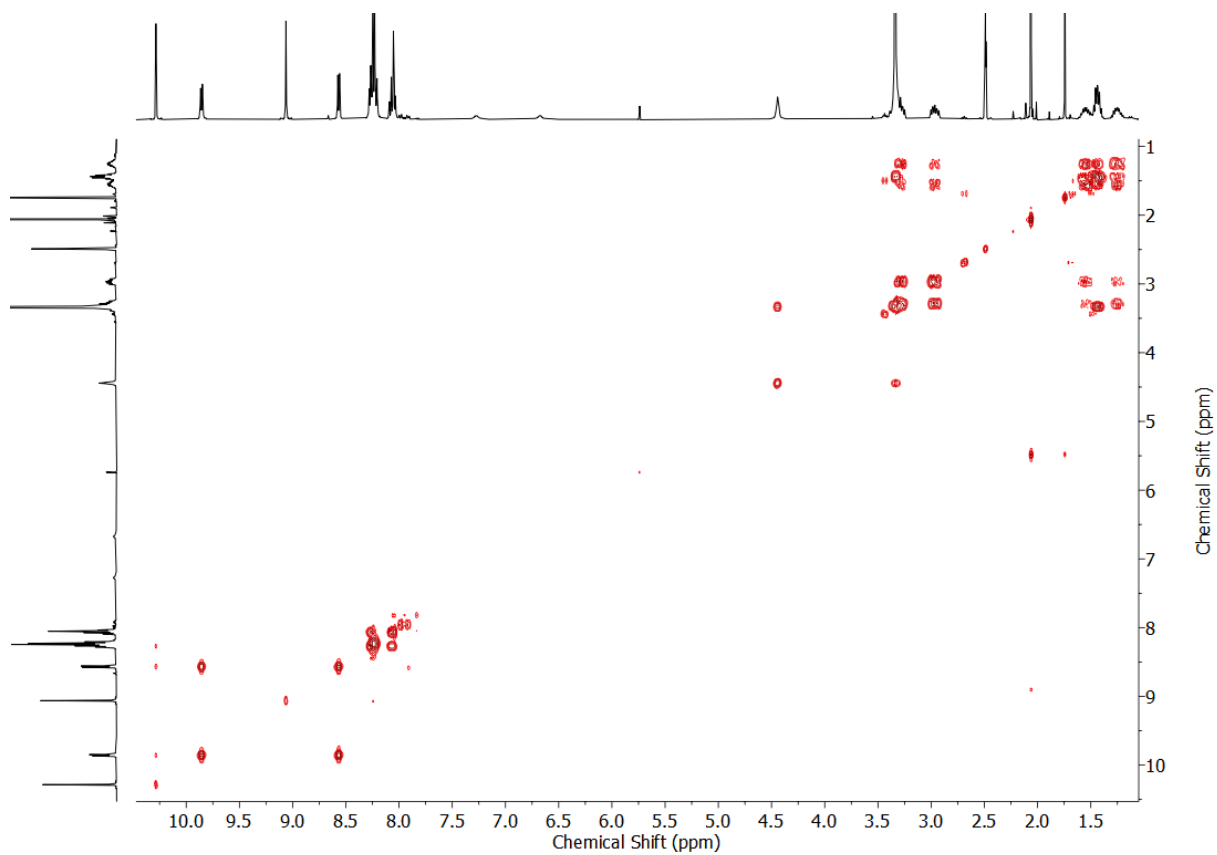

**Figure S68** COSY NMR ( $d_6$ -DMSO) of  $[\text{Pd}_2(\text{L}^{\text{OH}})_4](\text{BF}_4)_4$ .

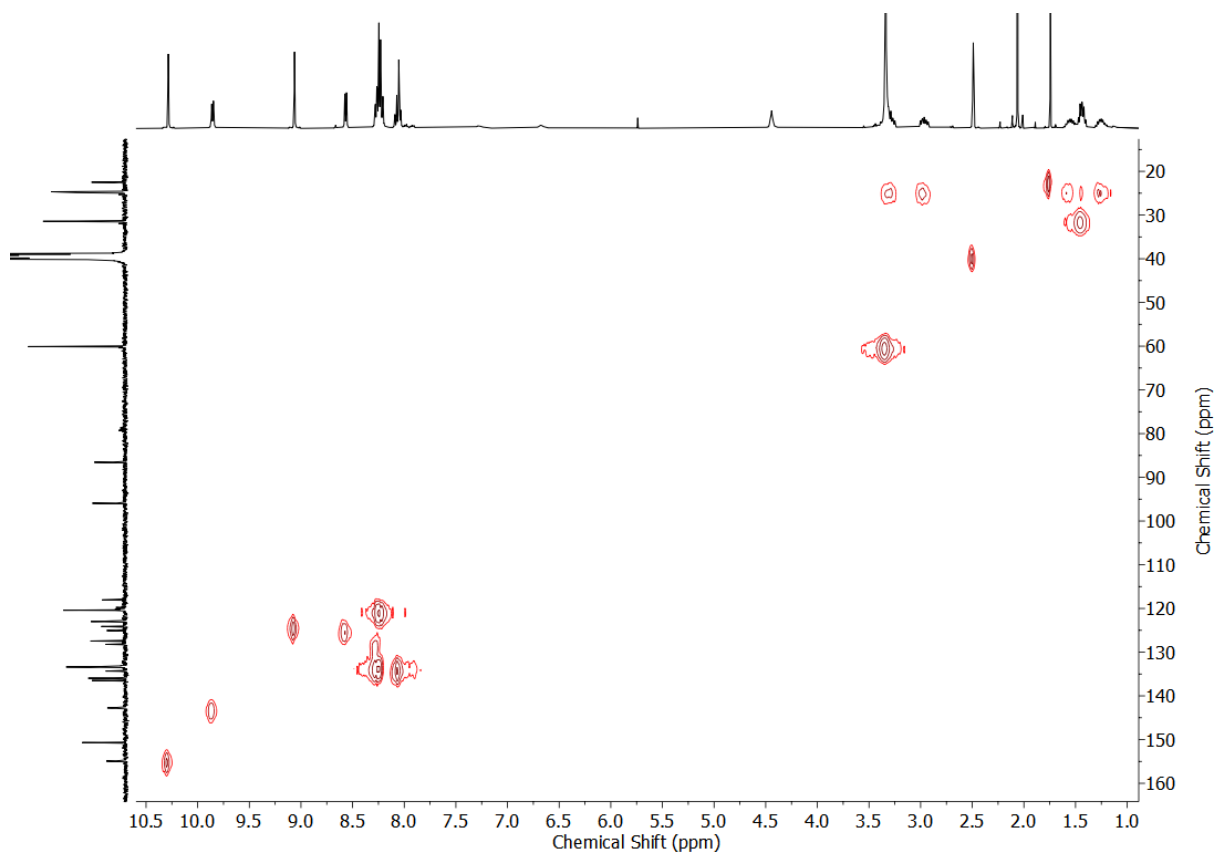

Figure S69 HSQC NMR ( $d_6$ -DMSO) of  $[\text{Pd}_2(\text{L}^{\text{OH}})_4](\text{BF}_4)_4$ .

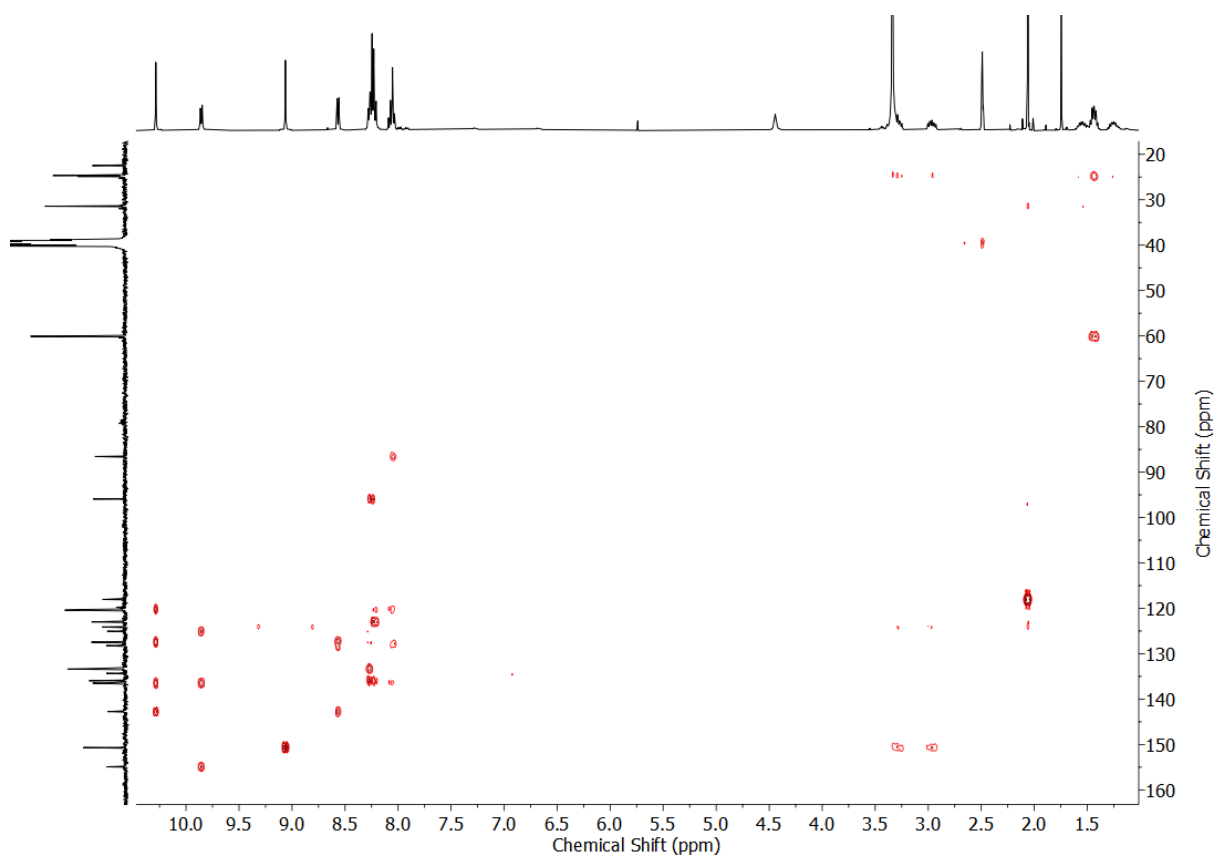

Figure S70 HMBC NMR ( $d_6$ -DMSO) of  $[\text{Pd}_2(\text{L}^{\text{OH}})_4](\text{BF}_4)_4$ .

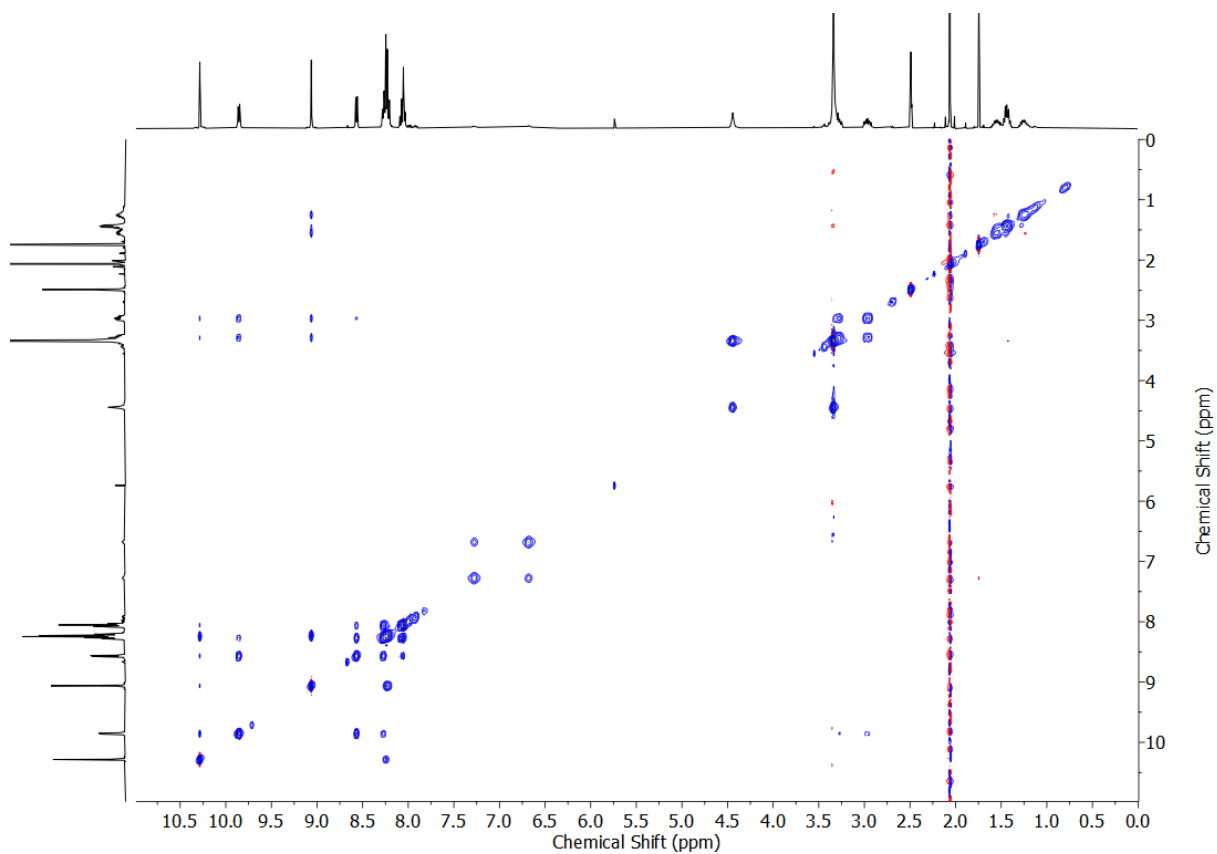

Figure S71 NOESY NMR ( $d_6$ -DMSO, 400 MHz) of  $[\text{Pd}_2(\text{L}^{\text{OH}})_4](\text{BF}_4)_4$ .

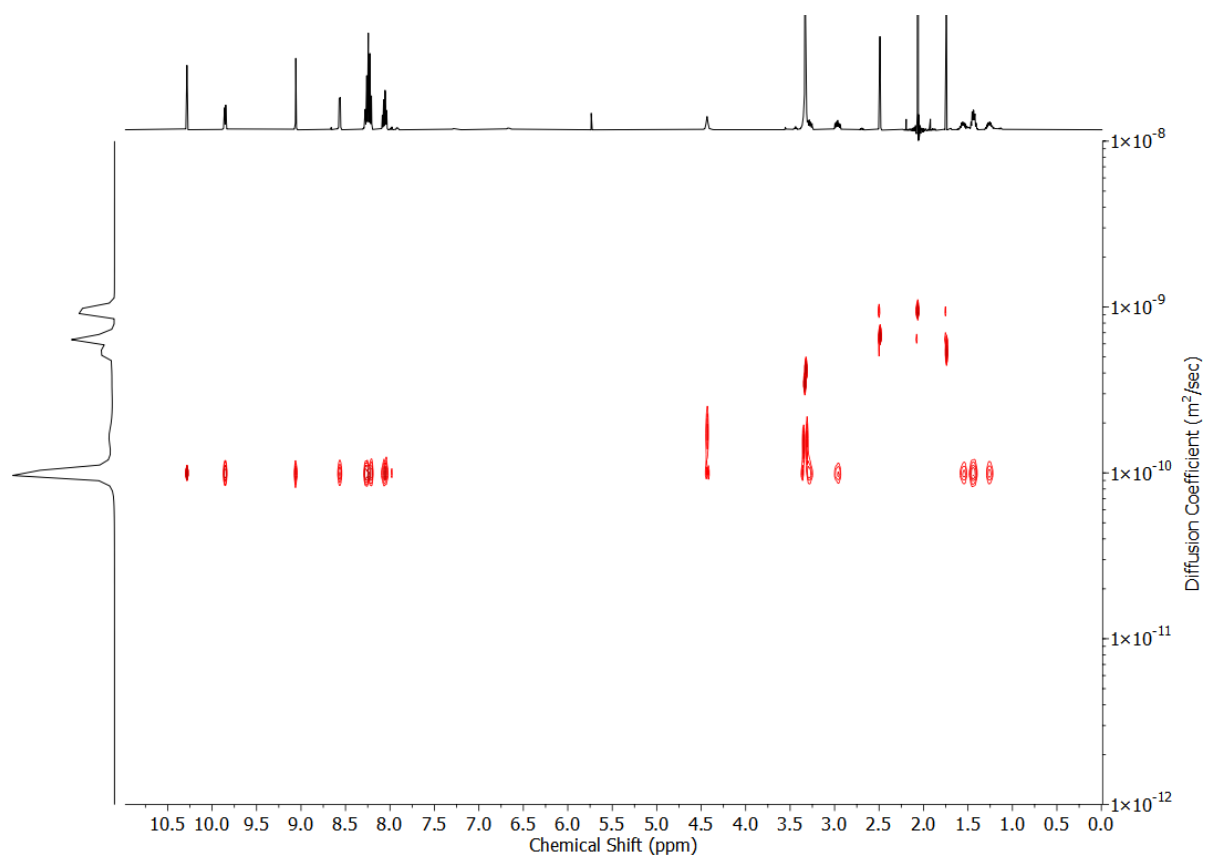

Figure S72 DOSY NMR ( $d_6$ -DMSO, 500 MHz) of  $[\text{Pd}_2(\text{L}^{\text{OH}})_4](\text{BF}_4)_4$ .

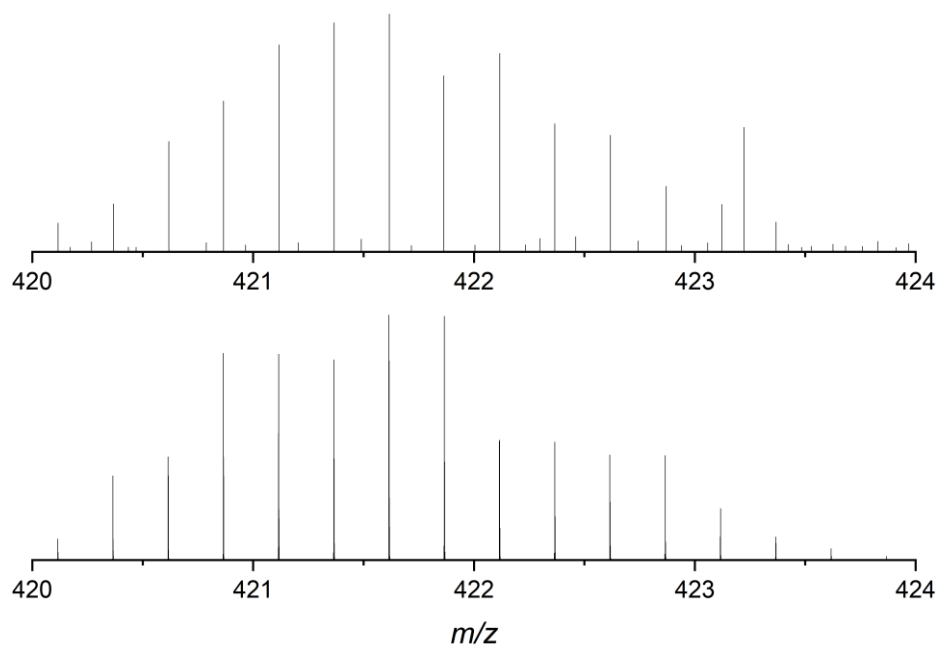

**Figure S73** Observed (top) and calculated (bottom) isotopic patterns for  $[\text{Pd}_2(\text{L}^{\text{OH}})_4]^{4+}$ .

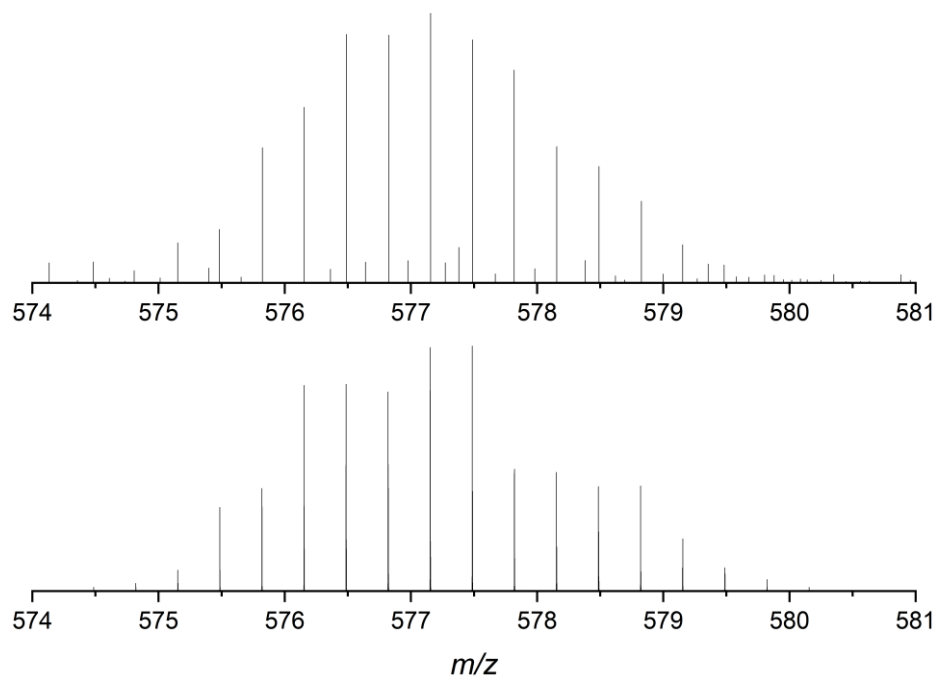

**Figure S74** Observed (top) and calculated (bottom) isotopic patterns for  $[\text{Pd}_2(\text{L}^{\text{OH}})_4(\text{HCO}_2)]^{3+}$ .

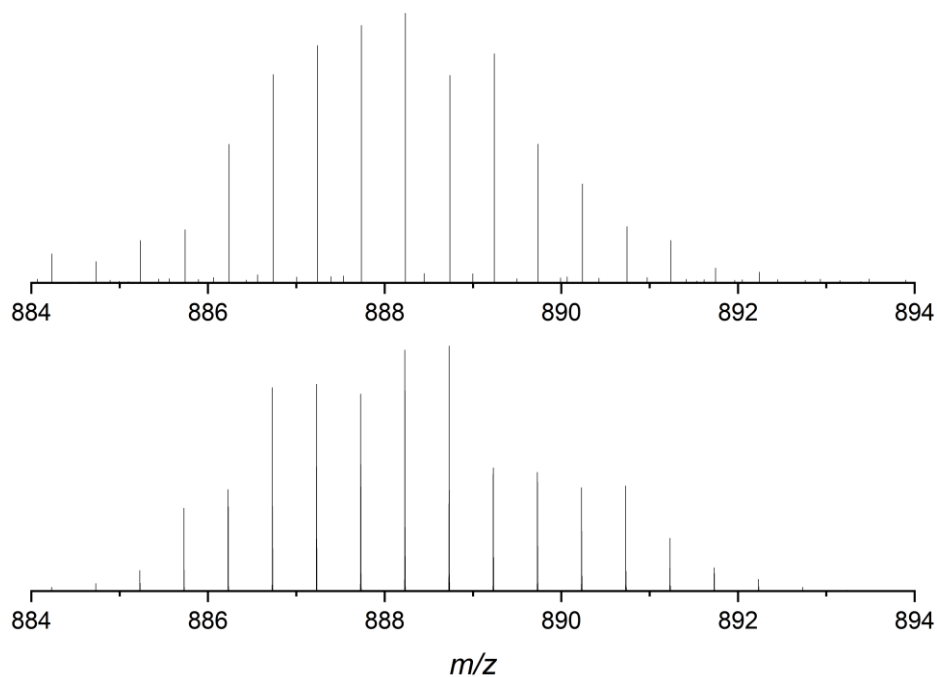

Figure S75 Observed (top) and calculated (bottom) isotopic patterns for  $\{[\text{Pd}_2(\text{L}^{\text{OH}})_4](\text{HCO}_2)_2\}^{2+}$ .

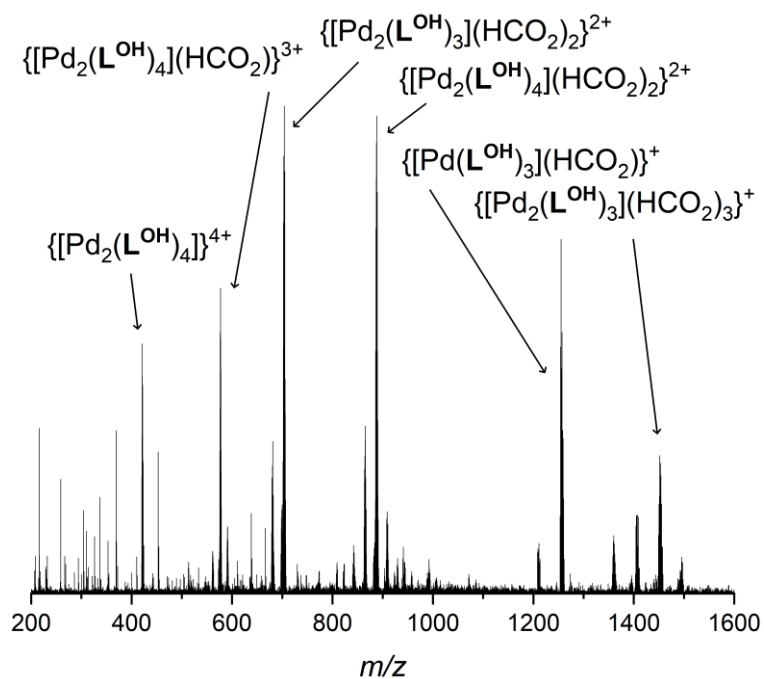

Figure S76 ESI-MS of  $[\text{Pd}_2(\text{L}^{\text{OH}})_4](\text{BF}_4)_4$ .



**[Pd<sub>2</sub>(L<sup>Ene</sup>)<sub>4</sub>](BF<sub>4</sub>)<sub>4</sub>**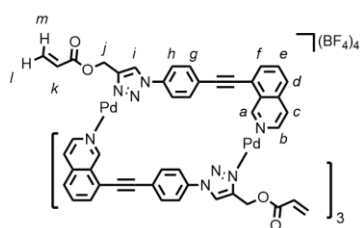

**L<sup>Ene</sup>** (11.4 mg, 0.030 mmol, 2.0 eq.) and [Pd(CH<sub>3</sub>CN)<sub>4</sub>](BF<sub>4</sub>)<sub>2</sub> (6.7 mg, 0.015 mmol, 1.0 eq.) were sonicated in *d*<sub>6</sub>-DMSO (0.75 mL) until all solids were dissolved, giving a light yellow solution. Quantitative conversion to [Pd<sub>2</sub>(L<sup>Ene</sup>)<sub>4</sub>](BF<sub>4</sub>)<sub>4</sub> was observed by <sup>1</sup>H NMR. <sup>1</sup>H NMR (400 MHz, *d*<sub>6</sub>-DMSO) δ: 10.27 (d, *J* = 0.8 Hz, 4H, H<sub>a</sub>), 9.78 (d, *J* = 6.7 Hz, 4H, H<sub>b</sub>), 9.32 (s, 4H, H<sub>i</sub>), 8.50 (d, *J* = 6.3 Hz, 4H, H<sub>c</sub>), 8.29-8.25 (m, 20H, H<sub>d</sub>, H<sub>g</sub>, H<sub>h</sub>), 8.10-8.05 (m, 8H, H<sub>e</sub>, H<sub>f</sub>), 6.12 (dd, *J* = 17.2, 1.4 Hz, 4H, H<sub>m</sub>), 5.87 (dd, *J* = 10.4, 1.4 Hz, 4H, H<sub>l</sub>), 5.83 (br.s, 8H, H<sub>j</sub>), 5.70 (dd, *J* = 17.2, 10.5 Hz, 4H, H<sub>k</sub>). Diffusion coefficient (500 MHz, *d*<sub>6</sub>-DMSO) *D*: 9.89 × 10<sup>-11</sup> m<sup>2</sup>s<sup>-1</sup>. <sup>13</sup>C NMR (101 MHz, *d*<sub>6</sub>-DMSO) δ: 164.7, 155.0, 145.1, 142.8, 136.6, 135.8, 134.3, 133.4, 133.2, 132.9, 128.3, 127.5, 127.1, 126.9, 125.1, 123.4, 120.7, 120.3, 95.8, 86.7, 56.1. ESI-MS *m/z* = 606.44 {[Pd<sub>2</sub>(L<sup>Ene</sup>)<sub>4</sub>](BF<sub>4</sub>)<sub>3</sub>}<sup>3+</sup> calc. 606.44; 953.18 {[Pd<sub>2</sub>(L<sup>Ene</sup>)<sub>4</sub>](BF<sub>4</sub>)<sub>2</sub>}<sup>2+</sup> calc. 953.16.

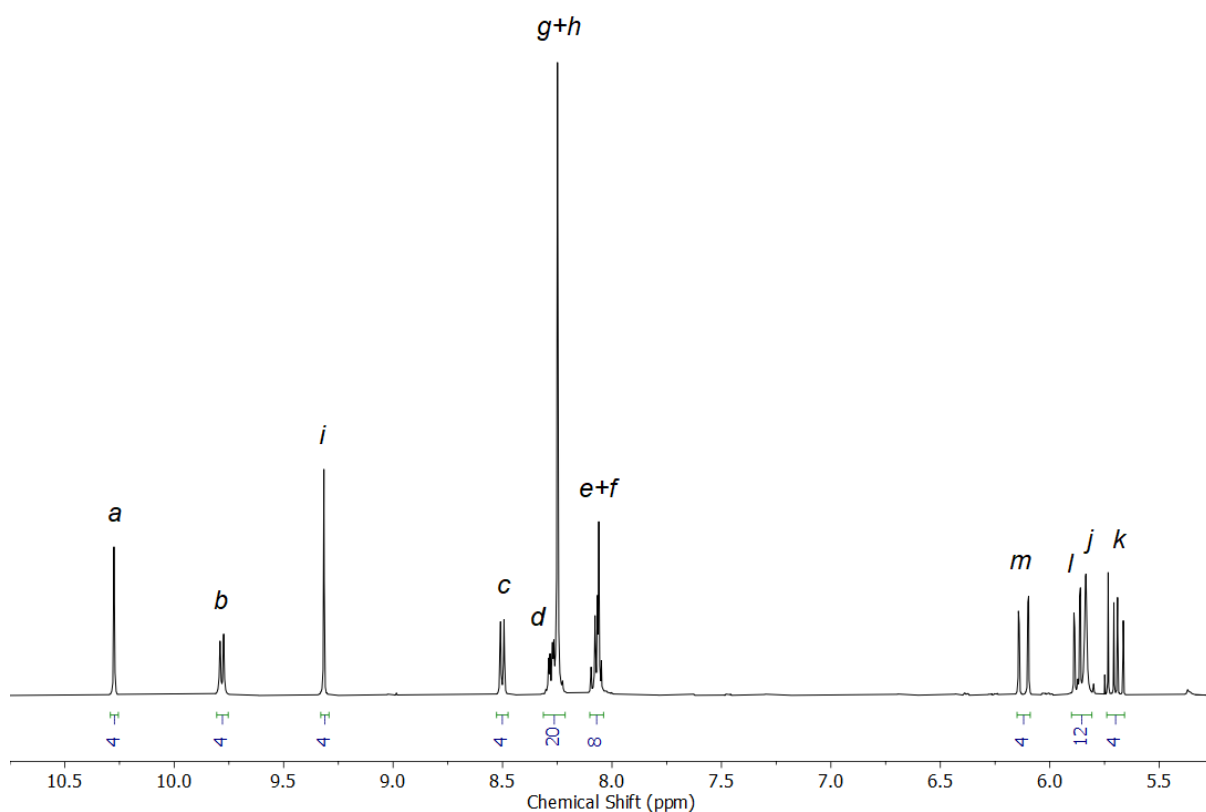

**Figure S77** <sup>1</sup>H NMR (*d*<sub>6</sub>-DMSO, 400 MHz) of [Pd<sub>2</sub>(L<sup>Ene</sup>)<sub>4</sub>](BF<sub>4</sub>)<sub>4</sub>.

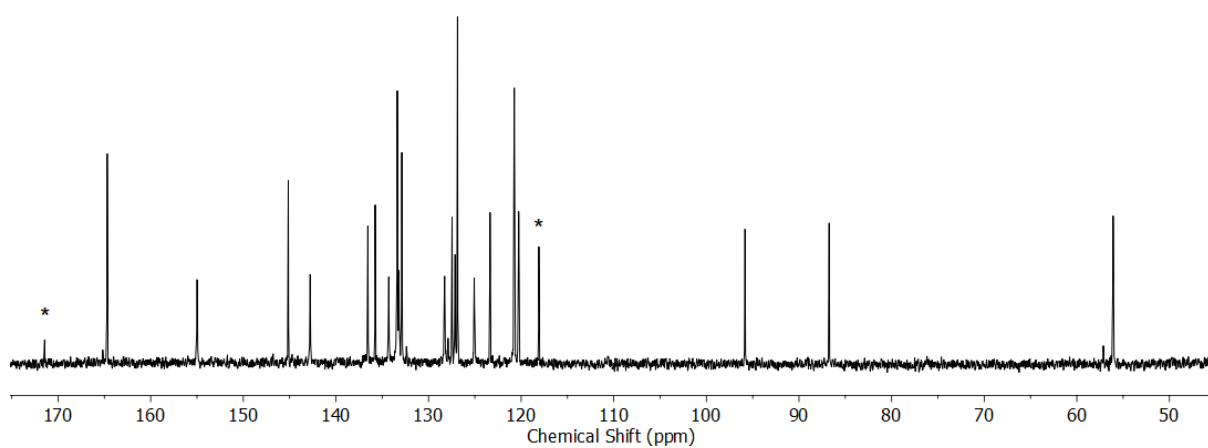

**Figure S78**  $^{13}\text{C}$  NMR ( $d_6$ -DMSO, 101 MHz) of  $[\text{Pd}_2(\text{L}^{\text{Ene}})_4](\text{BF}_4)_4$ . Impurities and  $\text{CH}_3\text{CN}$  from the Pd(II) source are indicated(\*).

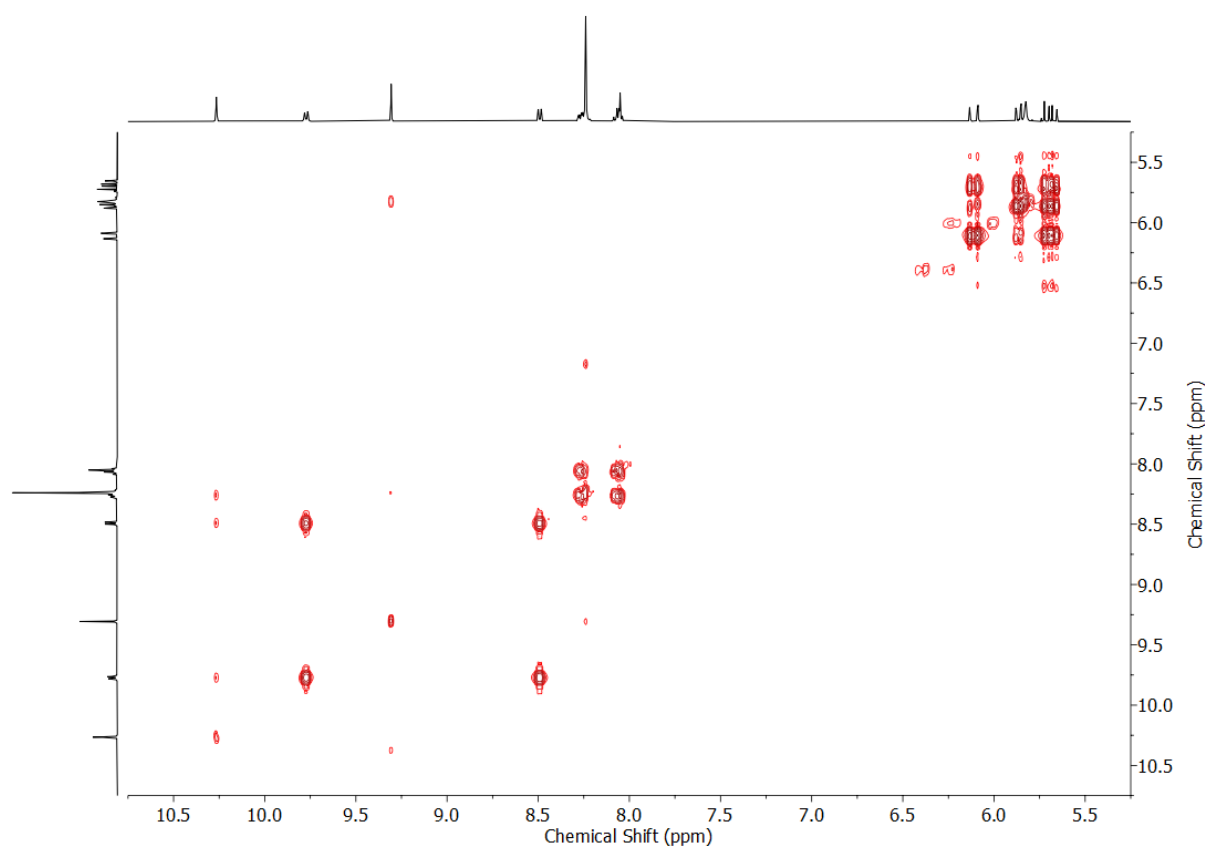

**Figure S79** COSY NMR ( $d_6$ -DMSO) of  $[\text{Pd}_2(\text{L}^{\text{Ene}})_4](\text{BF}_4)_4$ .

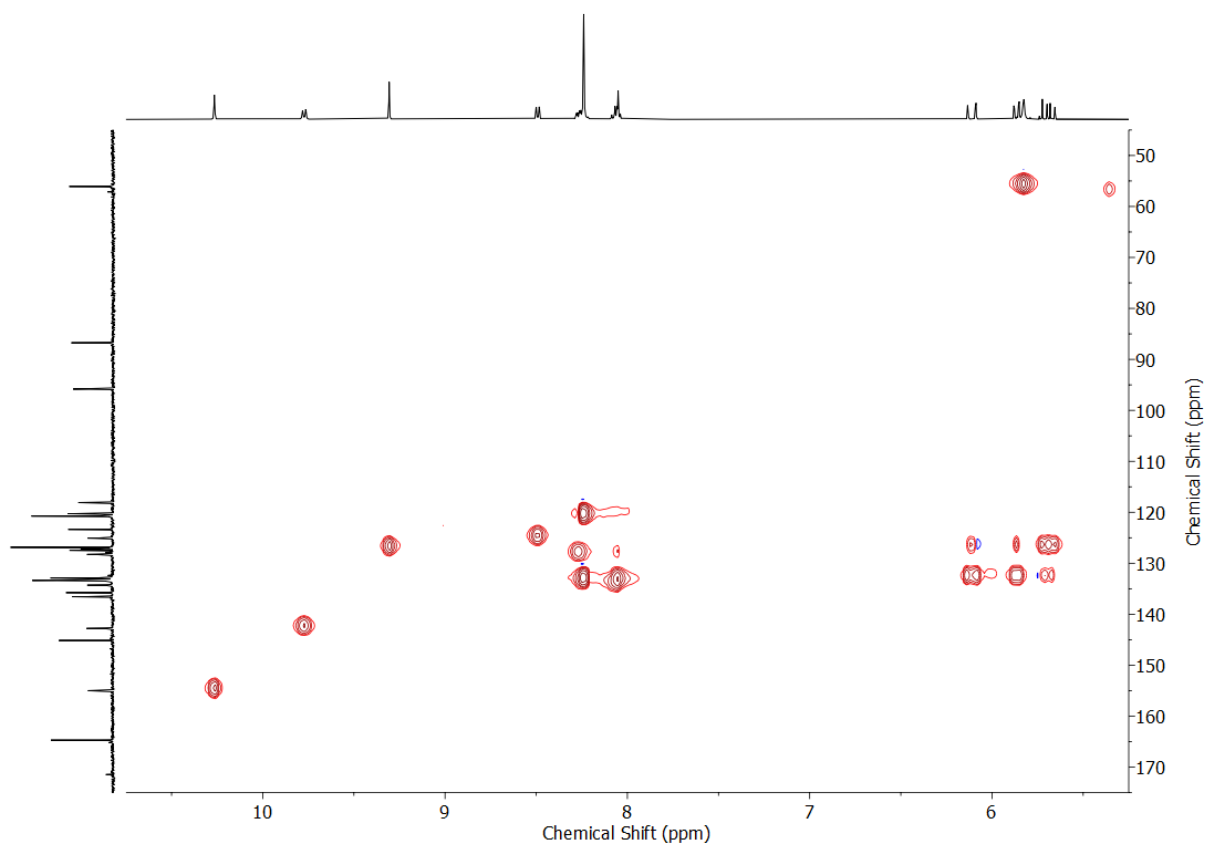

Figure S80 HSQC NMR ( $d_6$ -DMSO) of  $[\text{Pd}_2(\text{L}^{\text{Ene}})_4](\text{BF}_4)_4$ .

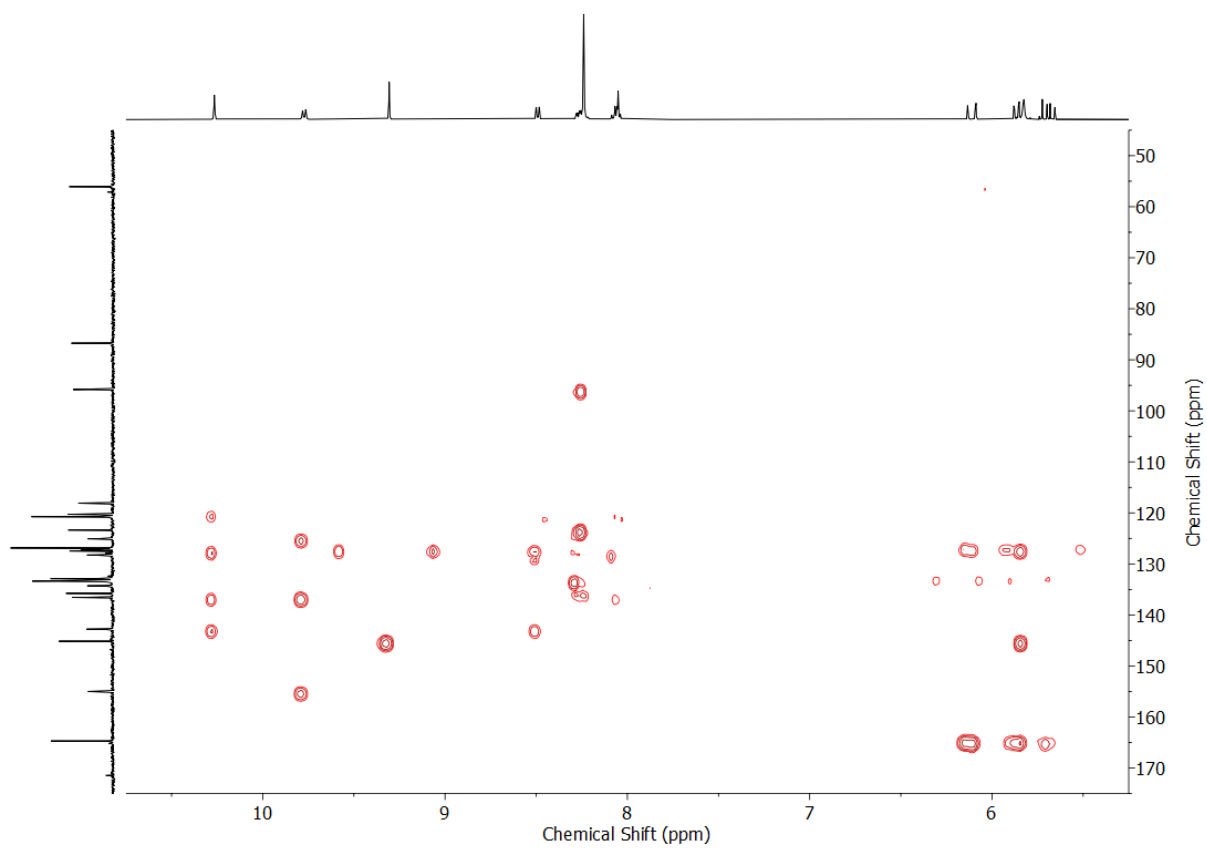

Figure S81 HMBC NMR ( $d_6$ -DMSO) of  $[\text{Pd}_2(\text{L}^{\text{Ene}})_4](\text{BF}_4)_4$ .

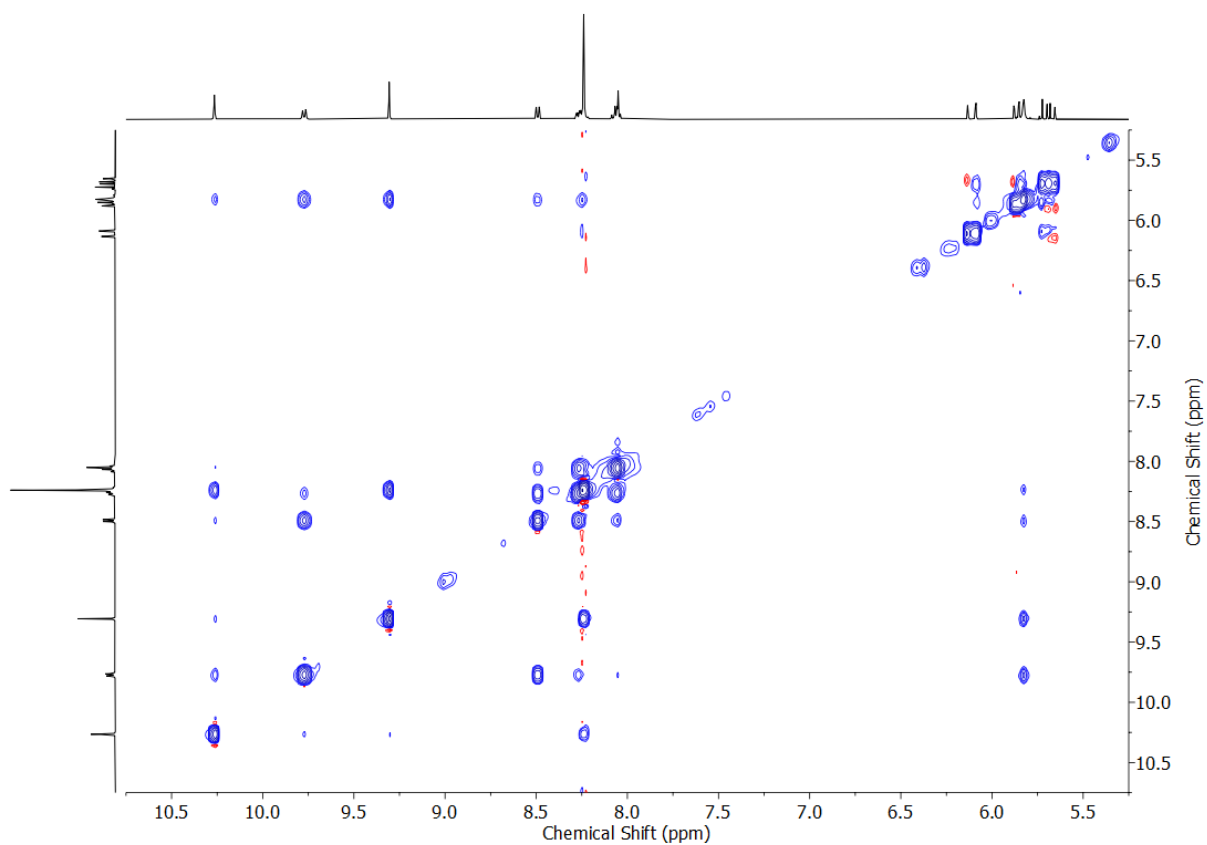

**Figure S82** NOESY NMR ( $d_6$ -DMSO, 400 MHz) of  $[\text{Pd}_2(\text{L}^{\text{Ene}})_4](\text{BF}_4)_4$ .

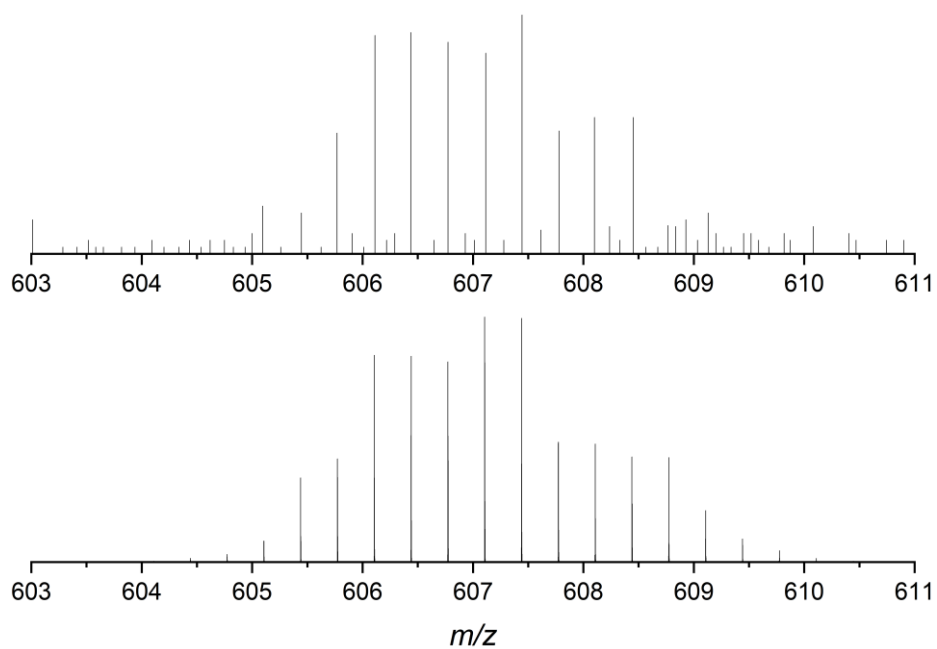

**Figure S83** Observed (top) and calculated (bottom) isotopic patterns for  $\{[\text{Pd}_2(\text{L}^{\text{Ene}})_4](\text{BF}_4)\}^{3+}$ .

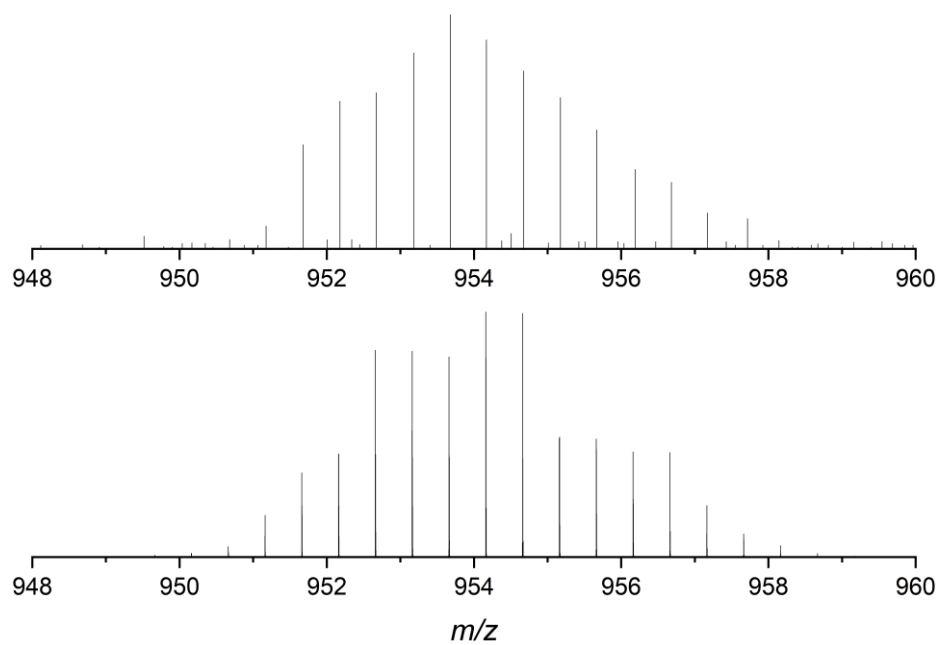

**Figure S84** Observed (top) and calculated (bottom) isotopic patterns for  $\{[Pd_2(L^{Ene})_4](BF_4)_2\}^{2+}$ .

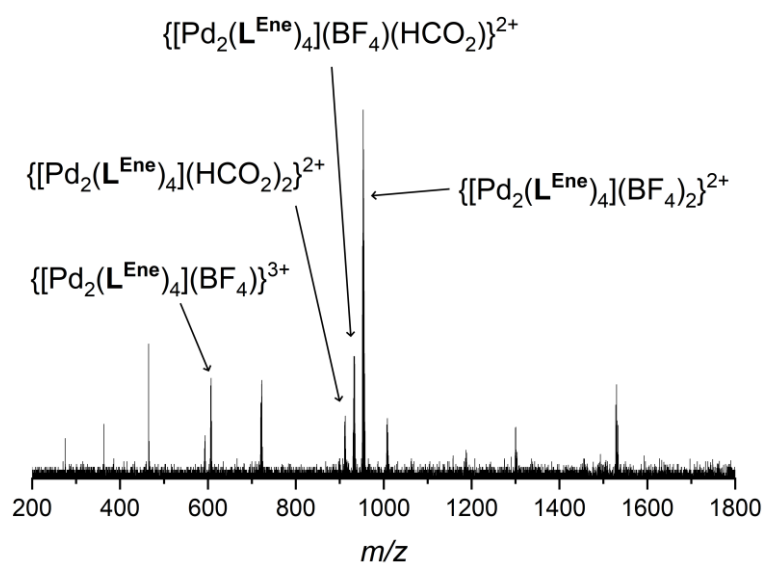

**Figure S85** ESI-MS of  $[Pd_2(L^{Ene})_4](BF_4)_4$ .

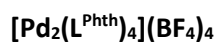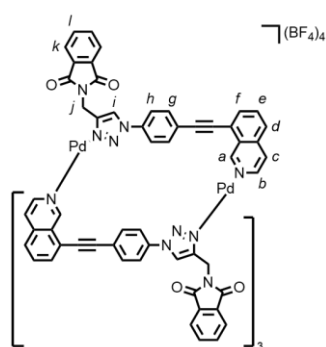

**L<sup>Phth</sup>** (13.7 mg, 0.030 mmol, 2.0 eq.) and [Pd(CH<sub>3</sub>CN)<sub>4</sub>](BF<sub>4</sub>)<sub>2</sub> (6.7 mg, 0.015 mmol, 1.0 eq.) were sonicated in *d*<sub>6</sub>-DMSO (0.75 mL) until all solids were dissolved, giving a light yellow solution. Quantitative conversion to [Pd<sub>2</sub>(L<sup>Phth</sup>)<sub>4</sub>](BF<sub>4</sub>)<sub>4</sub> was observed by <sup>1</sup>H NMR. <sup>1</sup>H NMR (500 MHz, *d*<sub>6</sub>-DMSO) δ: 10.31 (s, 4H, H<sub>a</sub>), 9.83 (d, *J* = 6.7 Hz, 4H, H<sub>b</sub>), 9.24 (s, 4H, H<sub>i</sub>), 8.55 (d, *J* = 6.5 Hz, 4H, H<sub>c</sub>), 8.34 (d, *J* = 7.3 Hz, 4H, H<sub>d</sub>), 8.24 (d, *J* = 8.7 Hz, 8H, H<sub>g</sub>), 8.18 (d, *J* = 8.8 Hz, 8H, H<sub>h</sub>), 8.12-8.07 (m, 8H, H<sub>e</sub>, H<sub>f</sub>), 7.83 (s, 8H, H<sub>k</sub>, H<sub>l</sub>), 5.54 (d, *J* = 16.5 Hz, 4H, H<sub>j</sub>), 5.03 (d, *J* = 16.5 Hz, 4H, H<sub>j'</sub>). Diffusion coefficient (500 MHz, *d*<sub>6</sub>-DMSO) *D*: 8.89 × 10<sup>-11</sup> m<sup>2</sup>s<sup>-1</sup>. <sup>13</sup>C NMR (126 MHz, *d*<sub>6</sub>-DMSO) δ: 167.2, 155.2, 146.8, 142.7, 136.7, 135.7, 134.7, 134.3, 133.4, 133.3, 131.5, 128.4, 127.8, 125.4, 125.3, 123.4, 123.4, 120.4, 120.4, 95.7, 86.9, 32.7. ESI-MS *m/z* = 706.45 {[Pd<sub>2</sub>(L<sup>Phth</sup>)<sub>4</sub>](BF<sub>4</sub>)<sub>3</sub>}<sup>3+</sup> calc. 706.45; 1103.18 {[Pd<sub>2</sub>(L<sup>Phth</sup>)<sub>4</sub>](BF<sub>4</sub>)<sub>2</sub>}<sup>2+</sup> calc. 1103.18.

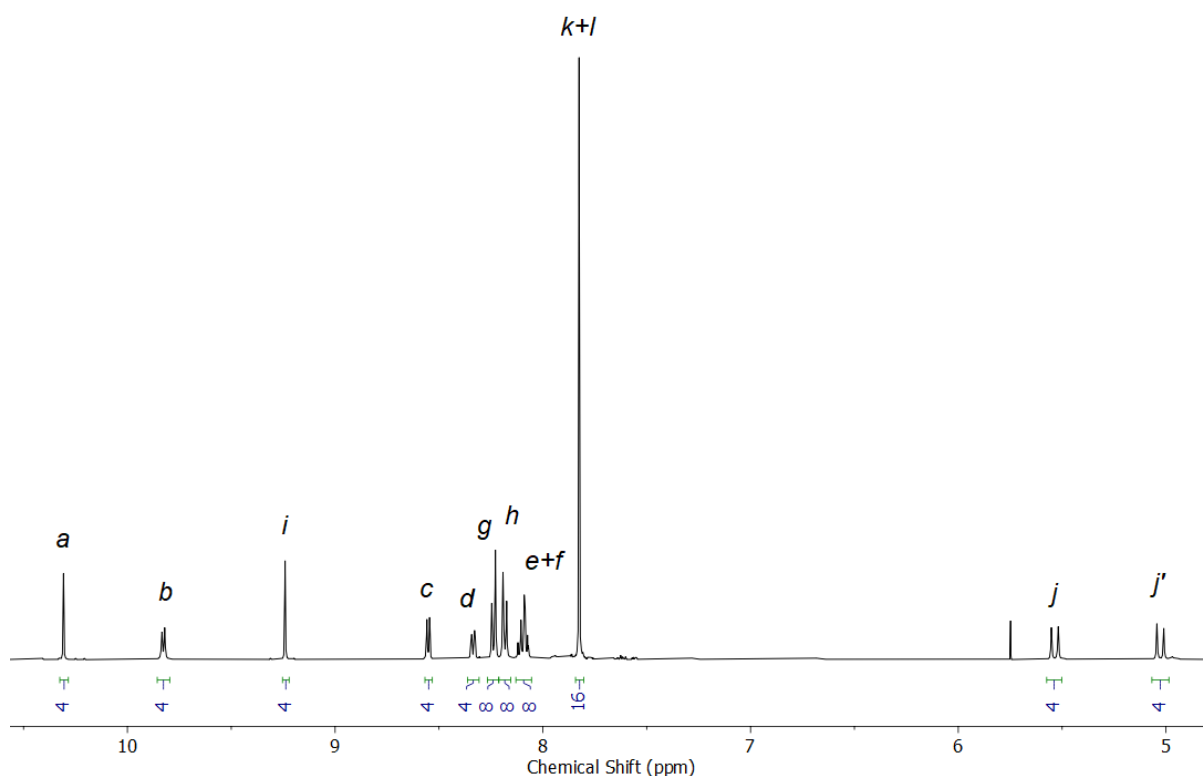

**Figure S86** <sup>1</sup>H NMR (*d*<sub>6</sub>-DMSO, 500 MHz) of [Pd<sub>2</sub>(L<sup>Phth</sup>)<sub>4</sub>](BF<sub>4</sub>)<sub>4</sub>.

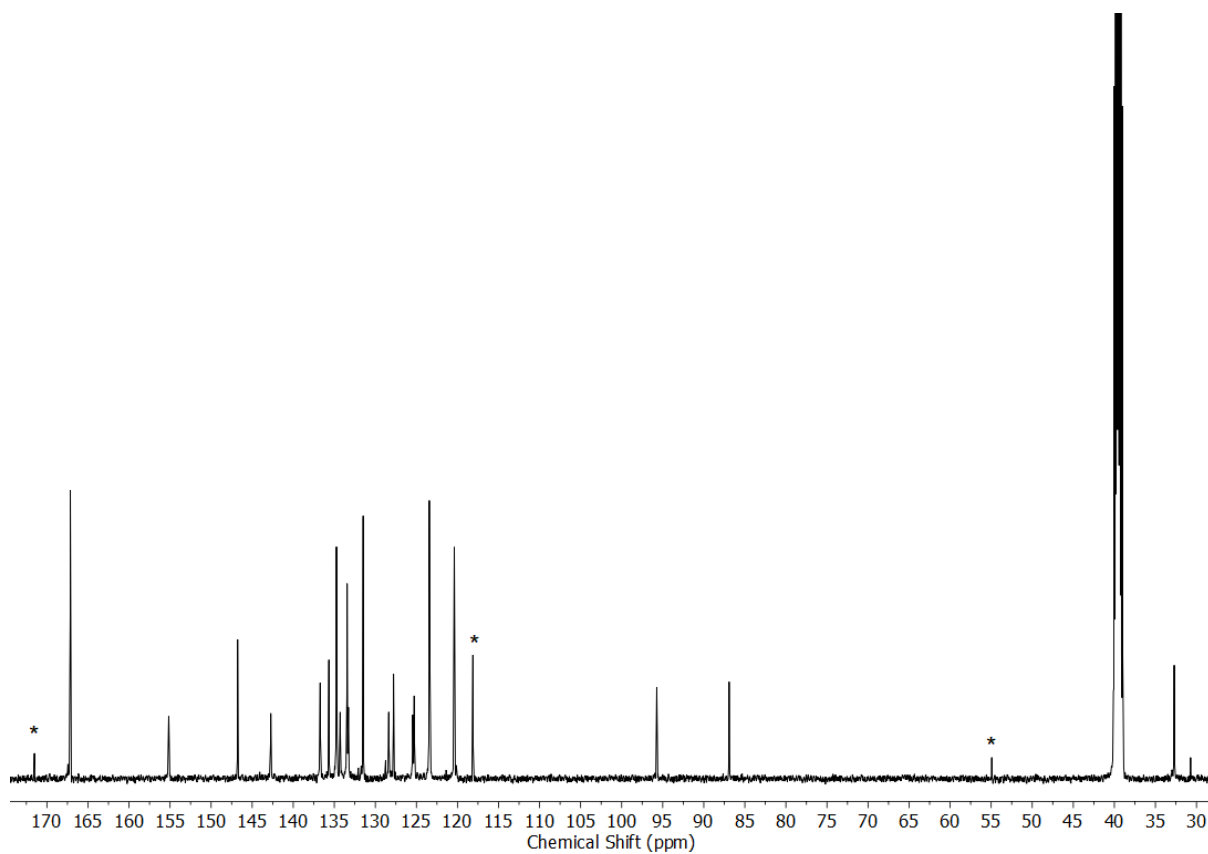

**Figure S87**  $^{13}\text{C}$  NMR ( $d_6$ -DMSO, 126 MHz) of  $[\text{Pd}_2(\text{L}^{\text{Phth}})_4](\text{BF}_4)_4$ . Impurities and  $\text{CH}_3\text{CN}$  from the Pd(II) source are indicated(\*).

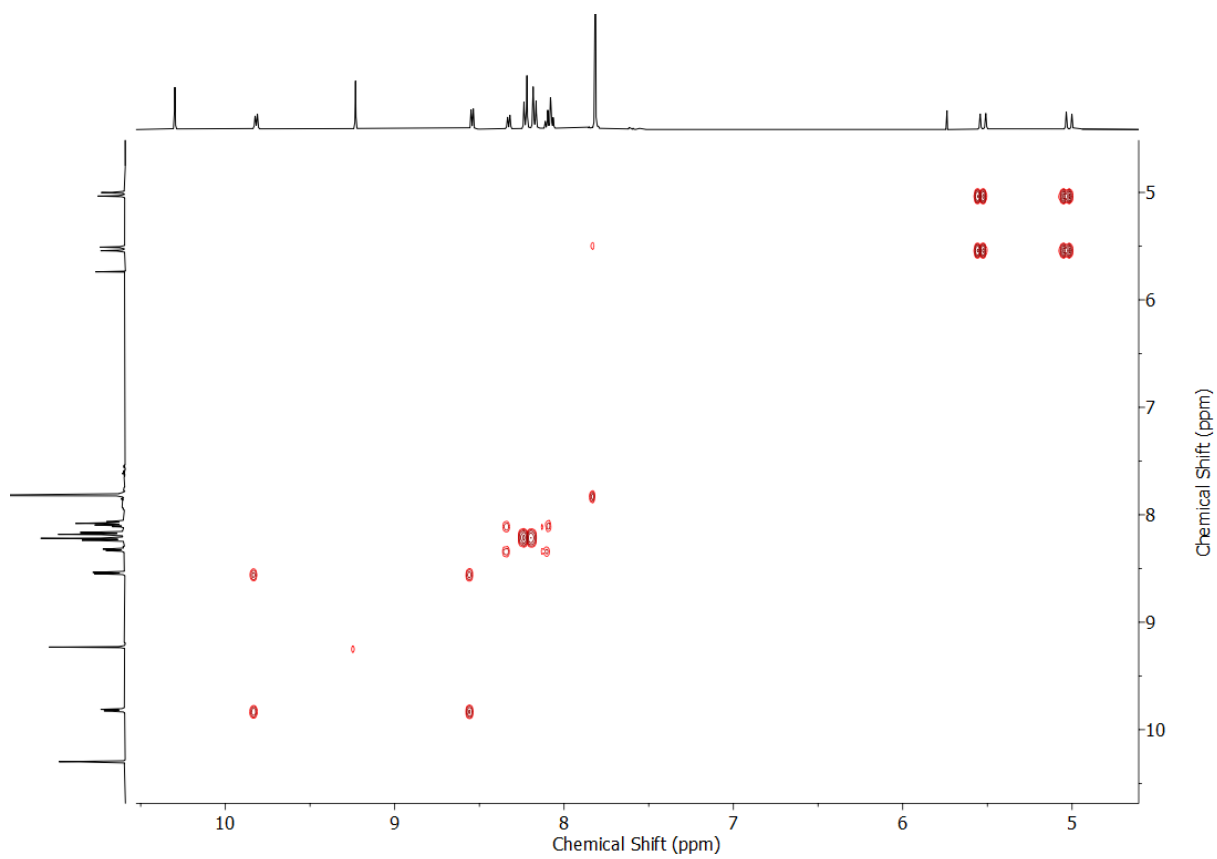

**Figure S88** COSY NMR ( $d_6$ -DMSO) of  $[\text{Pd}_2(\text{L}^{\text{Phth}})_4](\text{BF}_4)_4$ .

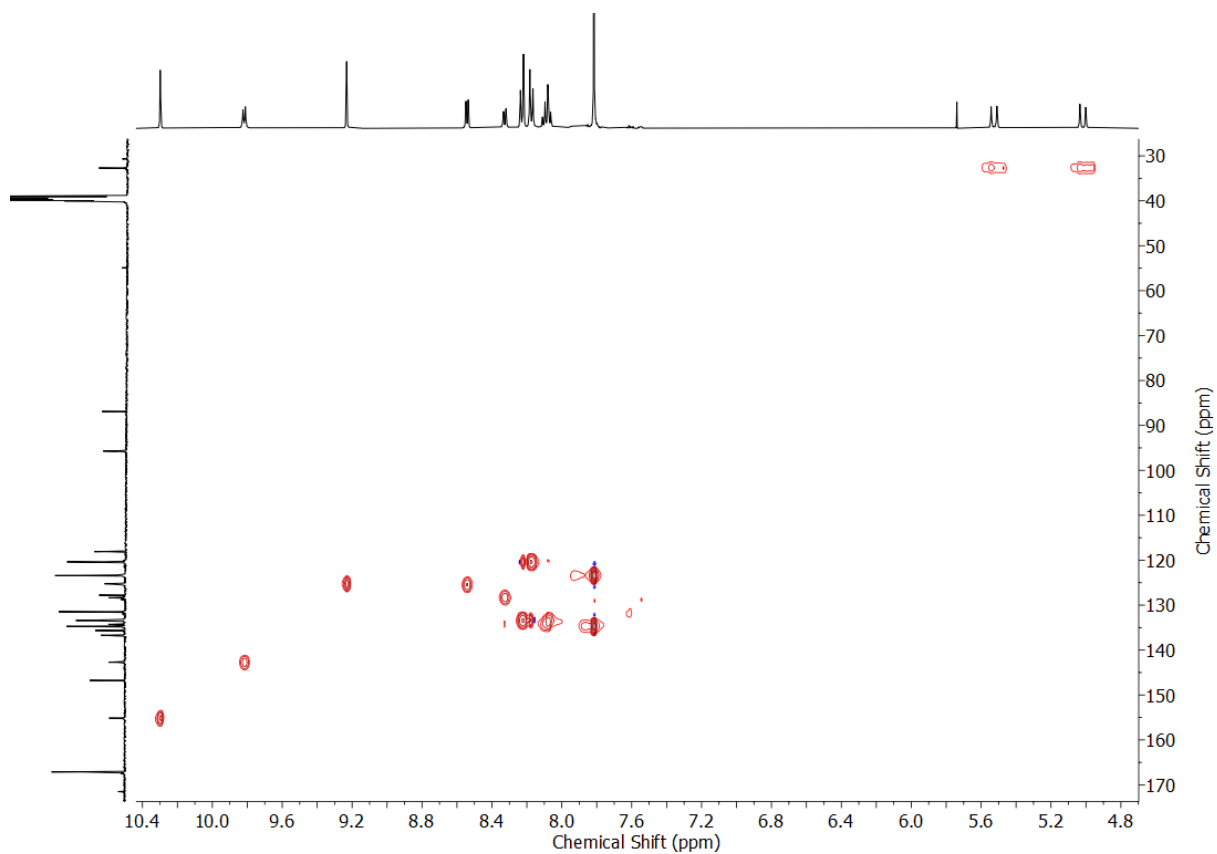

Figure S89 HSQC NMR ( $d_6$ -DMSO) of  $[\text{Pd}_2(\text{L}^{\text{Phth}})_4](\text{BF}_4)_4$ .

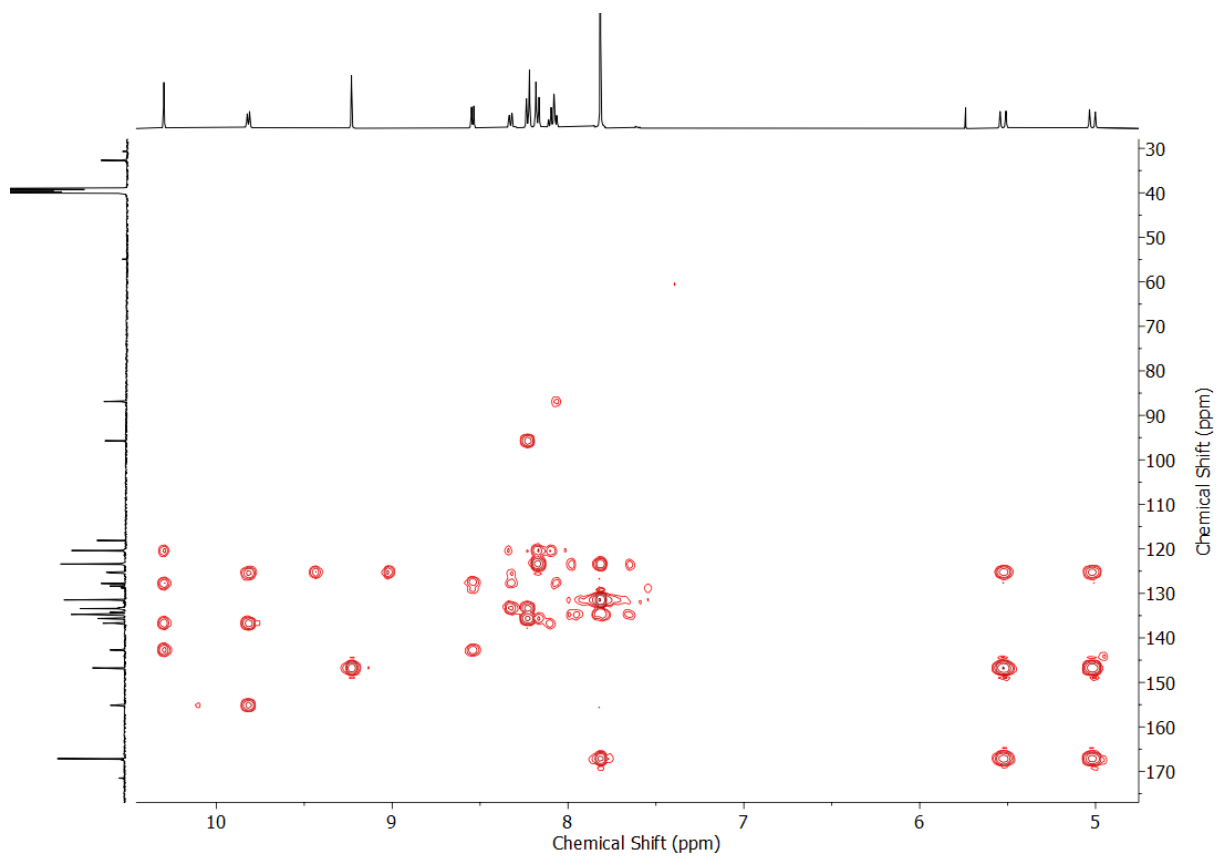

Figure S90 HMBC NMR ( $d_6$ -DMSO) of  $[\text{Pd}_2(\text{L}^{\text{Phth}})_4](\text{BF}_4)_4$ .



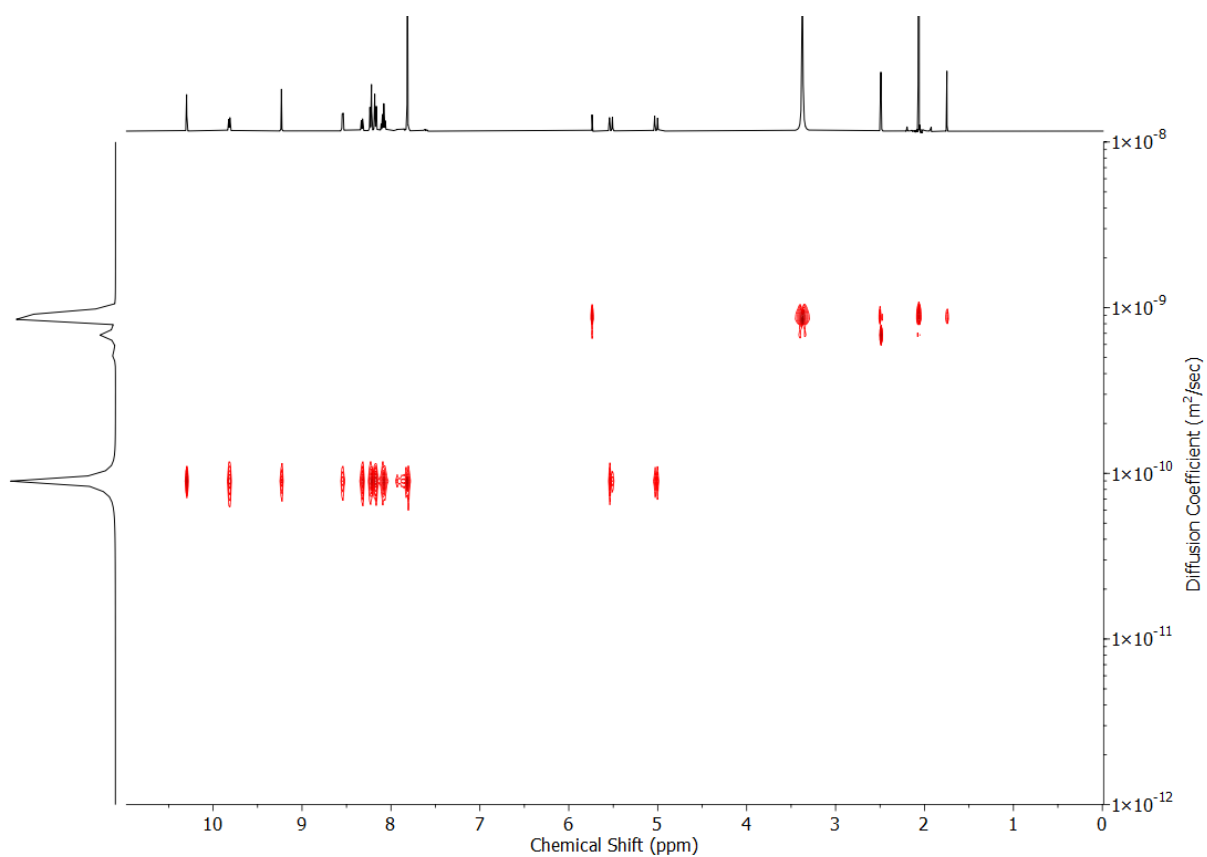

**Figure S91** DOSY NMR ( $d_6$ -DMSO, 500 MHz) of  $[\text{Pd}_2(\text{L}^{\text{Phth}})_4](\text{BF}_4)_4$ .

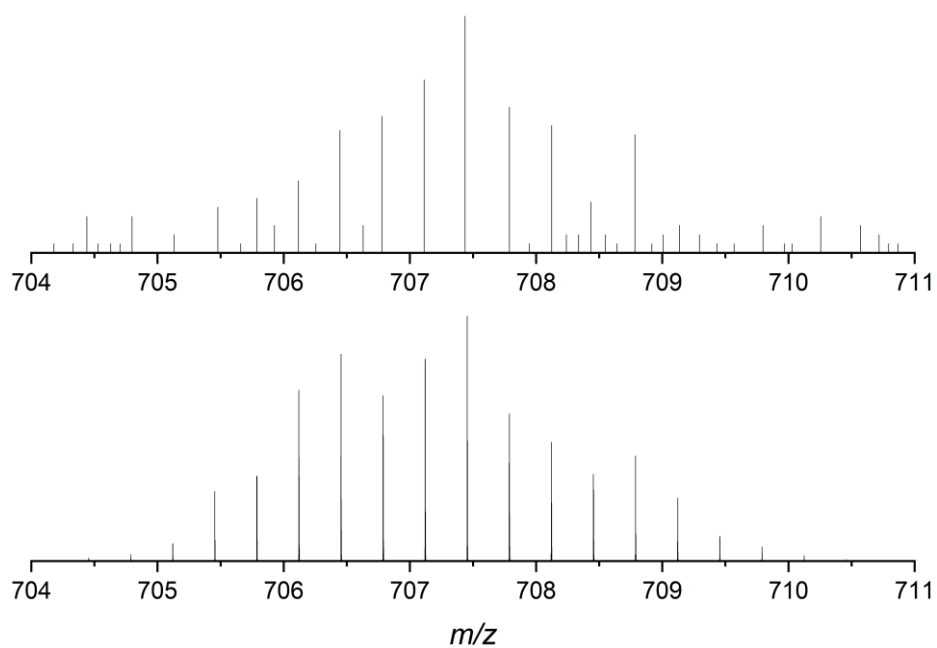

**Figure S92** Observed (top) and calculated (bottom) isotopic patterns for  $\{[\text{Pd}_2(\text{L}^{\text{Phth}})_4](\text{BF}_4)\}^{3+}$ .

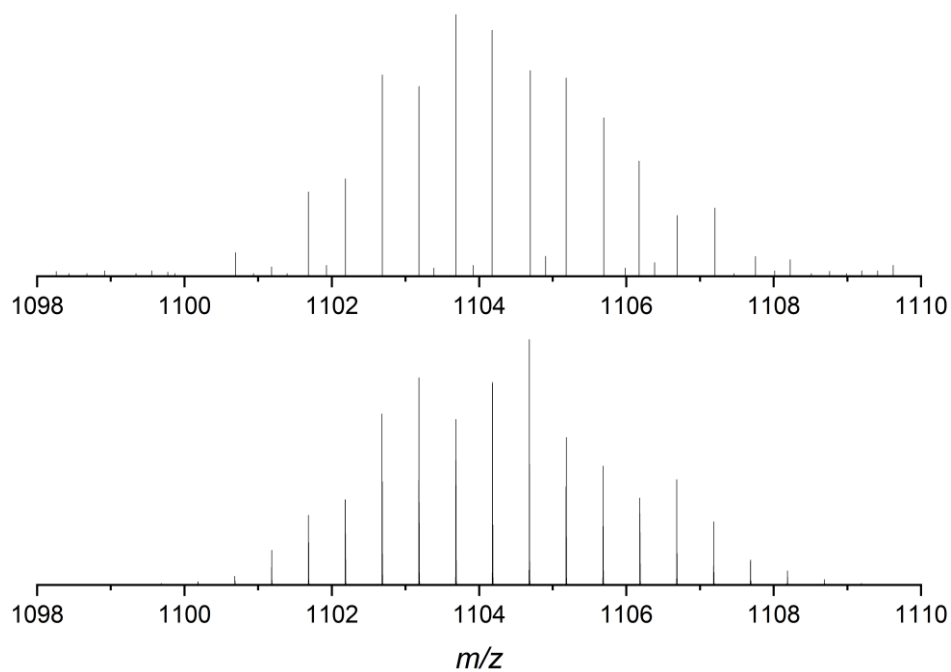

Figure S93 Observed (top) and calculated (bottom) isotopic patterns for  $\{[\text{Pd}_2(\text{L}^{\text{Phth}})_4](\text{BF}_4)_2\}^{2+}$ .

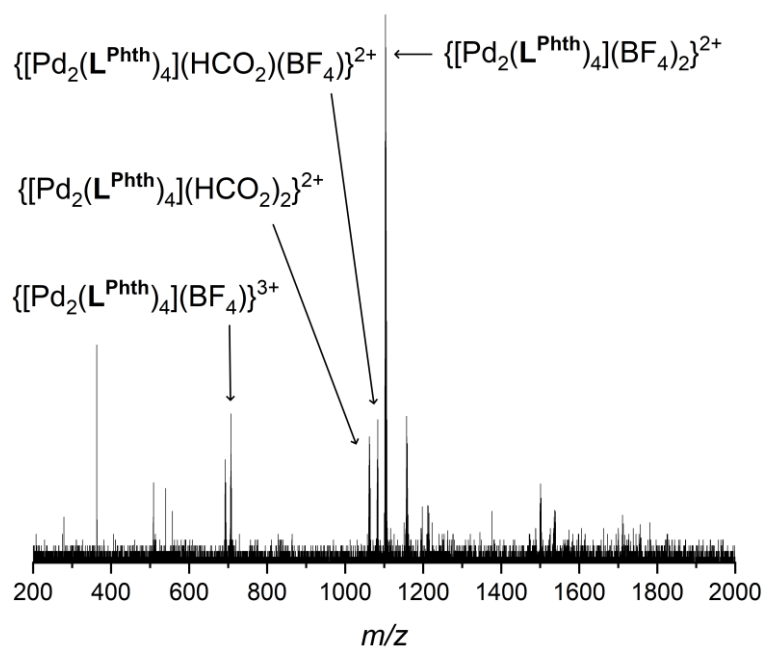

Figure S94 ESI-MS of  $[\text{Pd}_2(\text{L}^{\text{Phth}})_4](\text{BF}_4)_4$ .

### [Pd<sub>2</sub>(L<sup>Anth</sup>)<sub>4</sub>](BF<sub>4</sub>)<sub>4</sub>

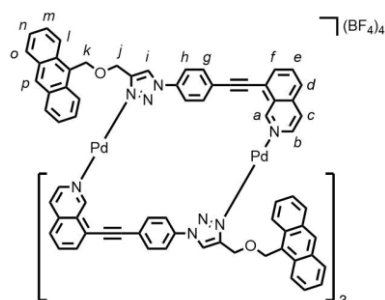

L<sup>Anth</sup> (15.5 mg, 0.030 mmol, 2.0 eq.) and [Pd(CH<sub>3</sub>CN)<sub>4</sub>](BF<sub>4</sub>)<sub>2</sub> (6.7 mg, 0.015 mmol, 1.0 eq.) were sonicated in *d*<sub>6</sub>-DMSO (0.75 mL) until all solids were dissolved, giving a light yellow solution. Quantitative conversion to [Pd<sub>2</sub>(L<sup>Anth</sup>)<sub>4</sub>](BF<sub>4</sub>)<sub>4</sub> was observed by <sup>1</sup>H NMR. <sup>1</sup>H NMR (500 MHz, *d*<sub>6</sub>-DMSO) δ: 10.19 (s, 4H, H<sub>a</sub>), 9.49 (d, *J* = 6.7 Hz, 4H, H<sub>b</sub>), 9.17 (s, 4H, H<sub>i</sub>), 8.64 (s, 4H, H<sub>p</sub>), 8.33 (d, *J* = 8.6 Hz, 8H, H<sub>g</sub>), 8.27 (d, *J* = 8.7 Hz, 8H, H<sub>h</sub>), 8.10 (d, *J* = 8.9 Hz, 4H, H<sub>o</sub>), 8.00 (d, *J* = 6.5 Hz, 4H, H<sub>c</sub>), 7.89-7.83 (m, 16H, H<sub>e</sub>, H<sub>f</sub>, H<sub>l</sub>), 7.79 (d, *J* = 8.0 Hz, 4H, H<sub>d</sub>), 7.44 (m, 8H, H<sub>n</sub>), 7.36 (ddd, *J* = 8.8, 6.5, 1.4 Hz, 8H, H<sub>m</sub>), 5.33 (d, *J* = 13.2 Hz, 4H, H<sub>j</sub>), 5.22 (d, *J* = 11.0 Hz, 4H, H<sub>k</sub>), 5.51 (d, *J* = 10.9 Hz, 4H, H<sub>k'</sub>), 4.68 (d, *J* = 13.3 Hz, 4H, H<sub>j'</sub>). Diffusion coefficient (500 MHz, *d*<sub>6</sub>-DMSO) *D*: 9.07 × 10<sup>-11</sup> m<sup>2</sup>s<sup>-1</sup>. <sup>13</sup>C NMR (126 MHz, *d*<sub>6</sub>-DMSO) δ: 154.6, 146.6, 142.4, 136.1, 135.7, 134.0, 133.5, 133.0, 130.8, 130.1, 129.0, 128.7, 127.7, 127.4, 127.2, 126.3, 125.9, 125.1, 124.7, 123.7, 123.5, 120.6, 119.9, 95.6, 86.9, 63.5, 61.7. ESI-MS *m/z* = 787.85 {[Pd<sub>2</sub>(L<sup>Anth</sup>)<sub>4</sub>](BF<sub>4</sub>)<sub>3</sub>}<sup>3+</sup> calc. 787.86; 1225.29 {[Pd<sub>2</sub>(L<sup>Anth</sup>)<sub>4</sub>](BF<sub>4</sub>)<sub>2</sub>}<sup>2+</sup> calc. 1225.30.

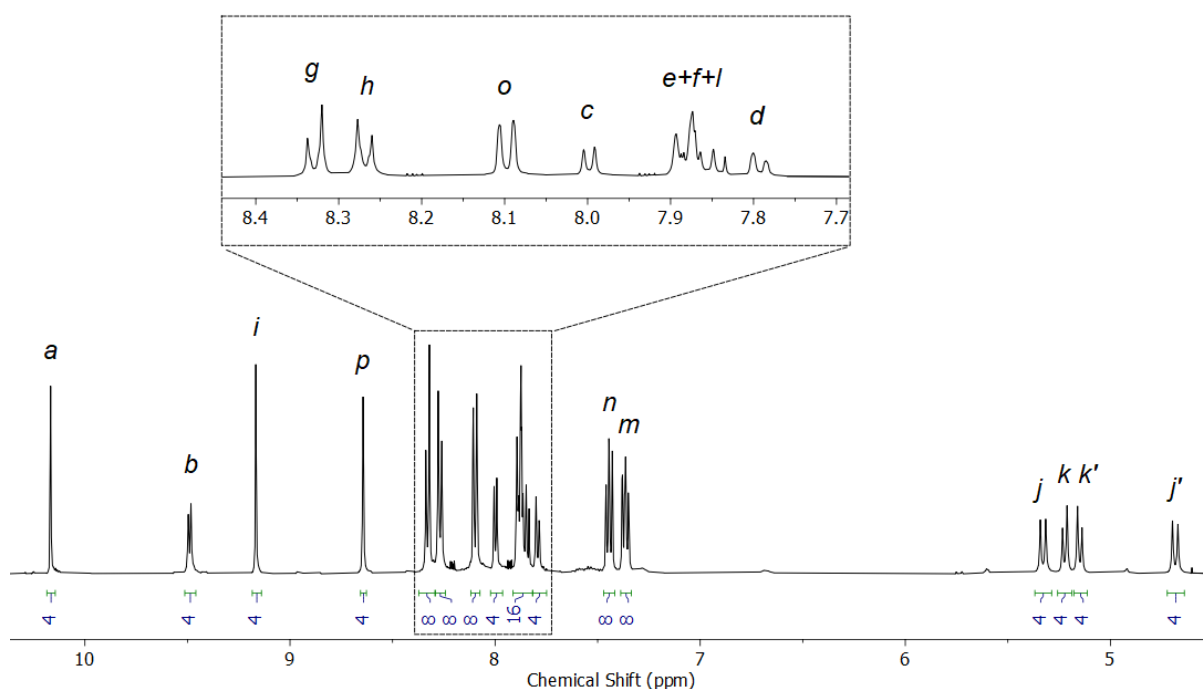

Figure S95 <sup>1</sup>H NMR (*d*<sub>6</sub>-DMSO, 500 MHz) of [Pd<sub>2</sub>(L<sup>Anth</sup>)<sub>4</sub>](BF<sub>4</sub>)<sub>4</sub>.

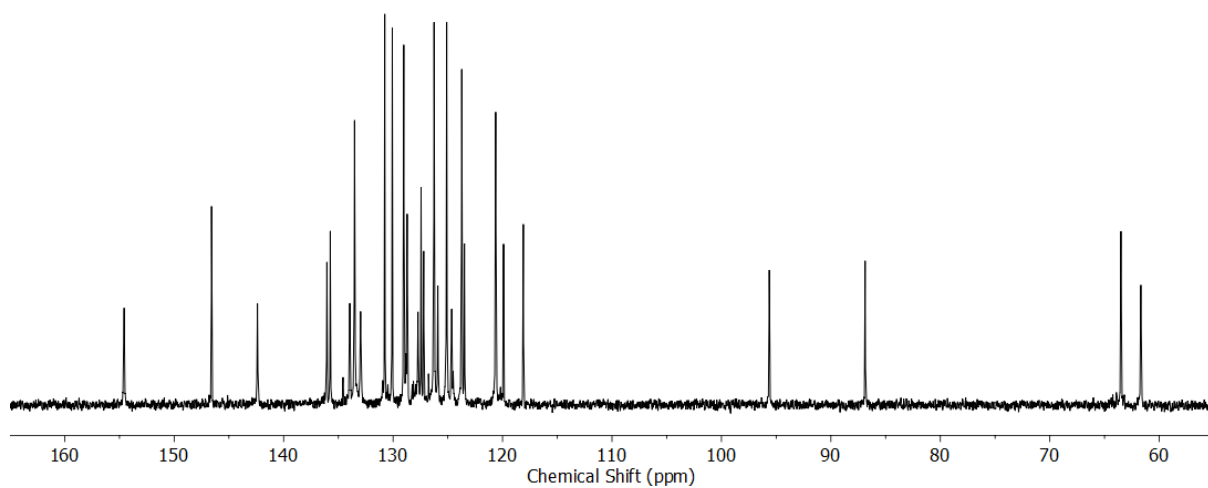

Figure S96  $^{13}\text{C}$  NMR ( $d_6$ -DMSO, 126 MHz) of  $[\text{Pd}_2(\text{L}^{\text{Anth}})_4](\text{BF}_4)_4$ .

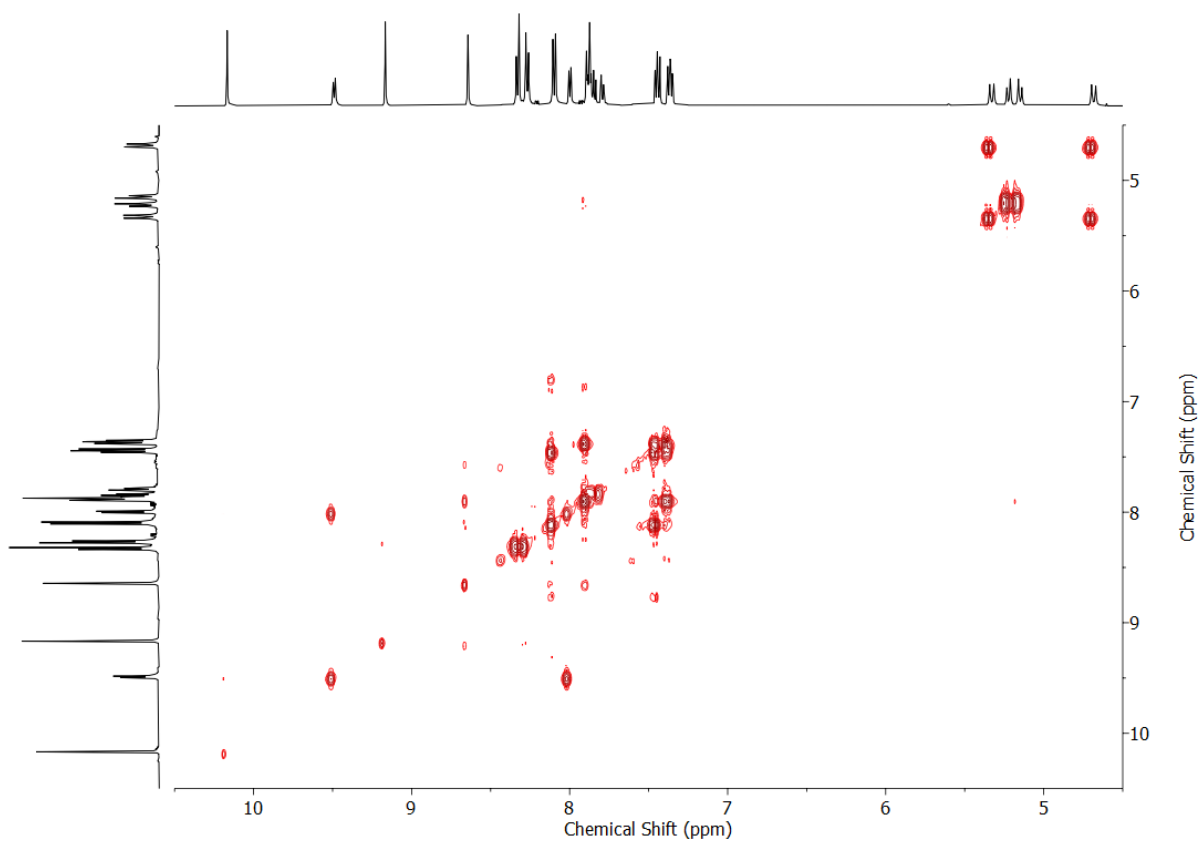

Figure S97 COSY NMR ( $d_6$ -DMSO) of  $[\text{Pd}_2(\text{L}^{\text{Anth}})_4](\text{BF}_4)_4$ .

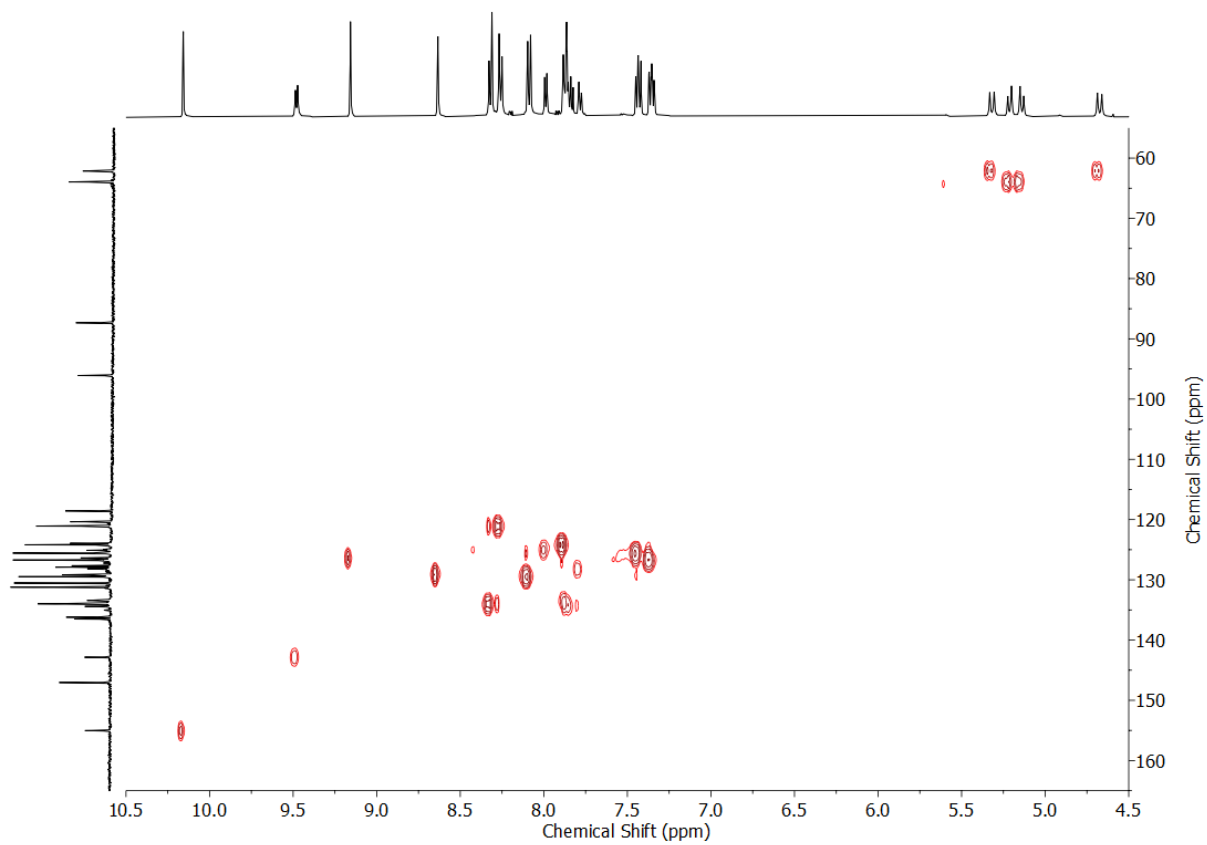

Figure S98 HSQC NMR ( $d_6$ -DMSO) of  $[\text{Pd}_2(\text{LAnth})_4](\text{BF}_4)_4$ .

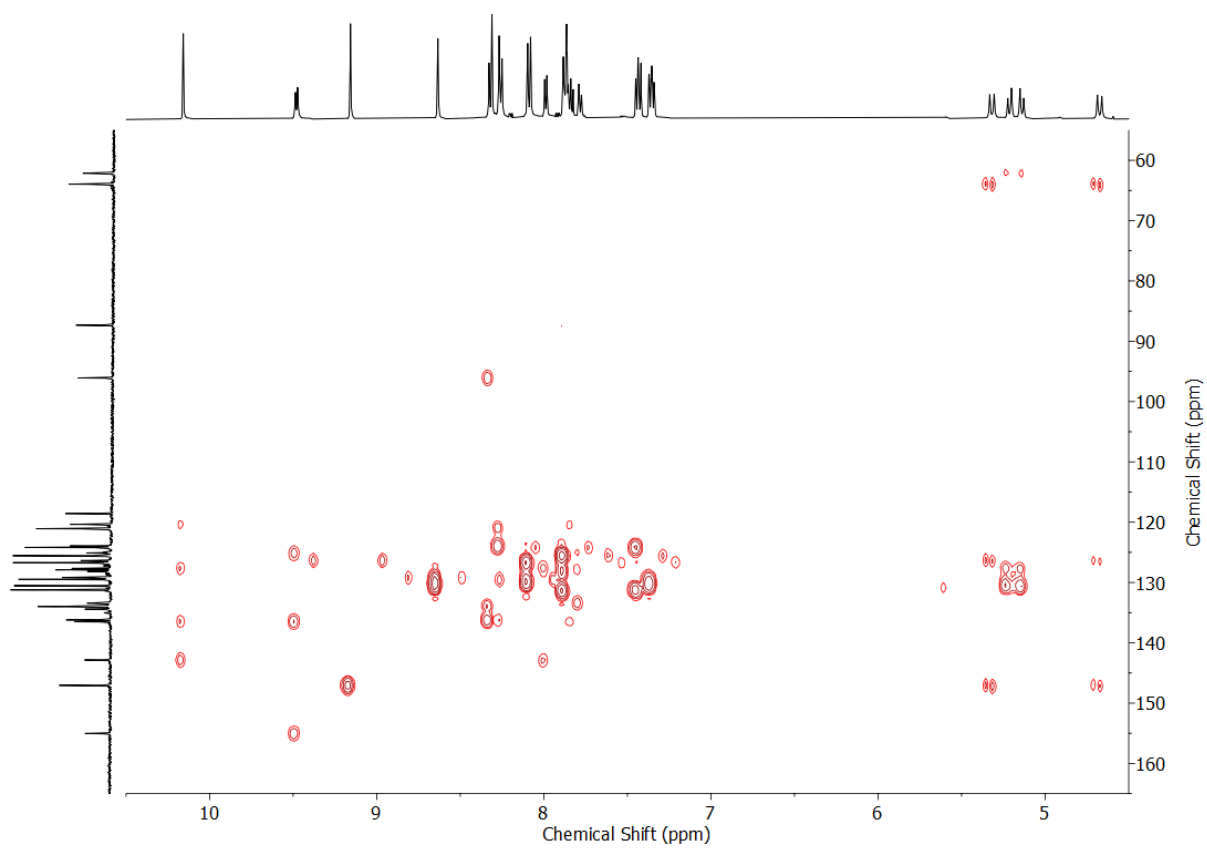

Figure S99 HMBC NMR ( $d_6$ -DMSO) of  $[\text{Pd}_2(\text{LAnth})_4](\text{BF}_4)_4$ .

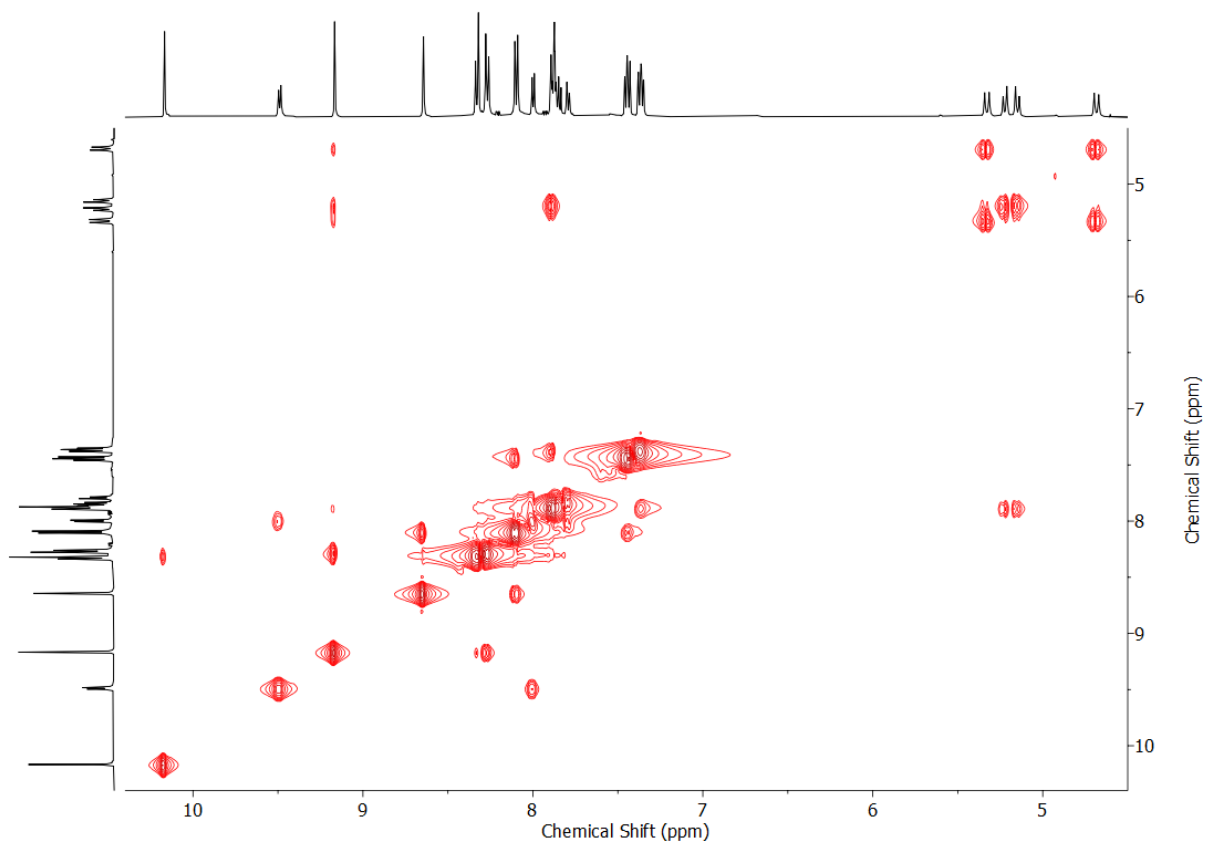

**Figure S100** NOESY NMR ( $d_6$ -DMSO, 500 MHz) of  $[\text{Pd}_2(\text{L}^{\text{Anth}})_4](\text{BF}_4)_4$ .

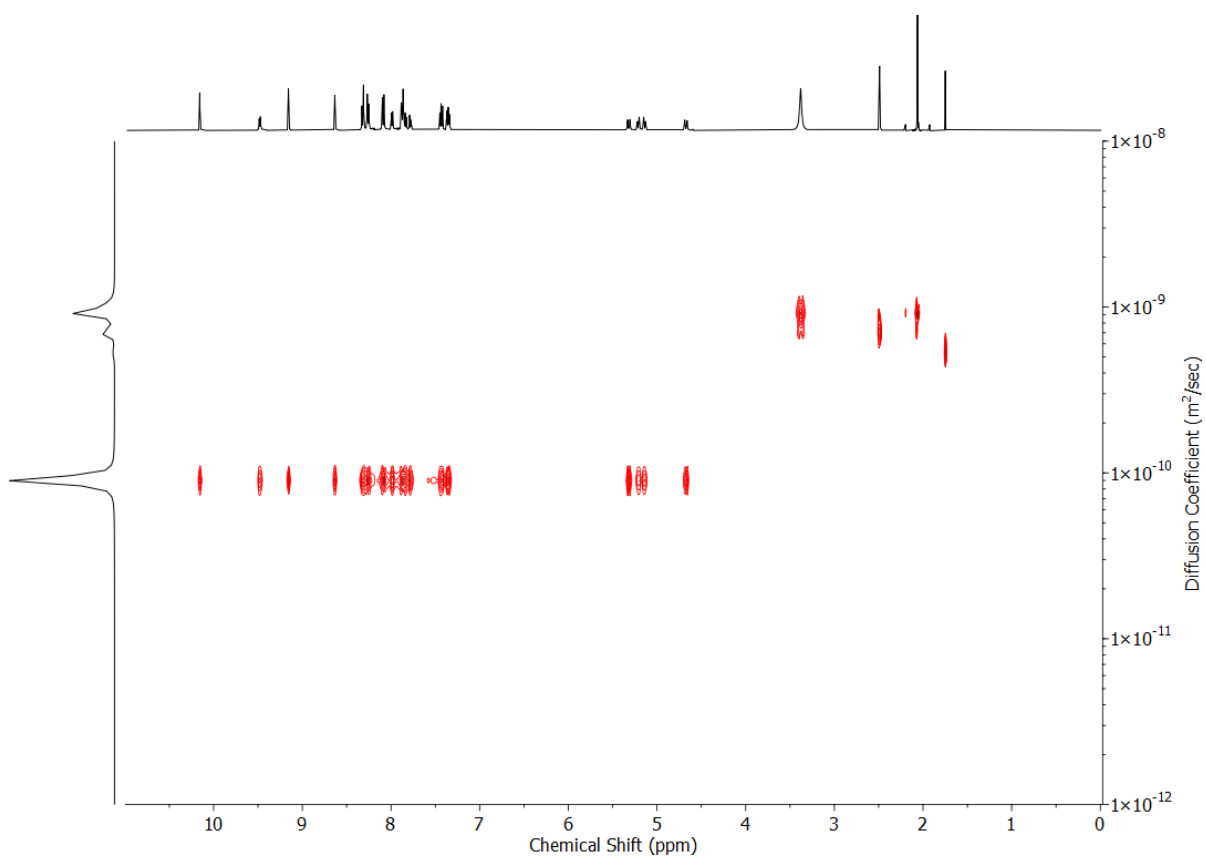

**Figure S101** DOSY NMR ( $d_6$ -DMSO, 500 MHz) of  $[\text{Pd}_2(\text{L}^{\text{Anth}})_4](\text{BF}_4)_4$ .

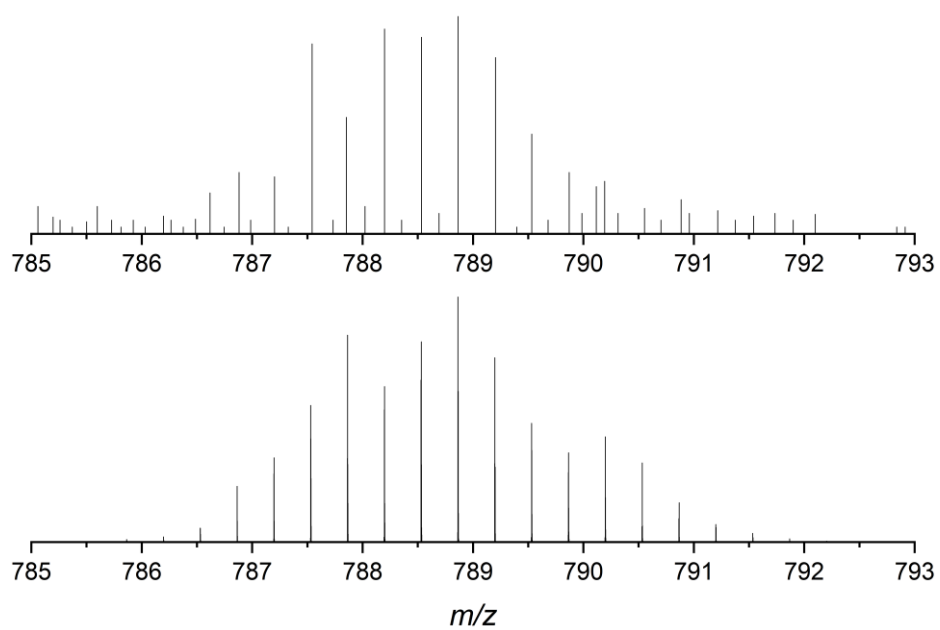

**Figure S102** Observed (top) and calculated (bottom) isotopic patterns for  $\{[\text{Pd}_2(\text{L}^{\text{Anth}})_4](\text{BF}_4)\}^{3+}$ .

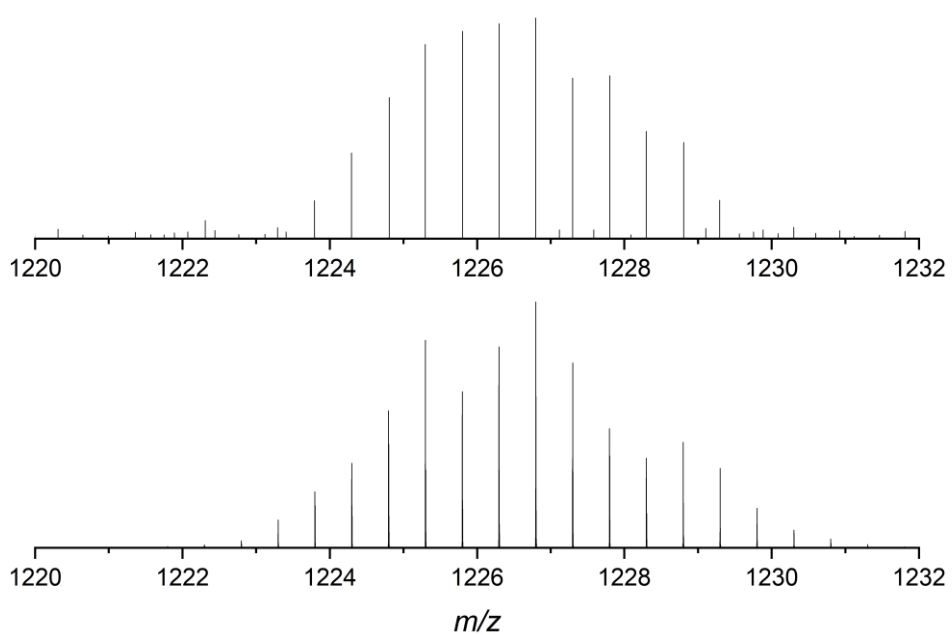

**Figure S103** Observed (top) and calculated (bottom) isotopic patterns for  $\{[\text{Pd}_2(\text{L}^{\text{Anth}})_4](\text{BF}_4)_2\}^{2+}$ .

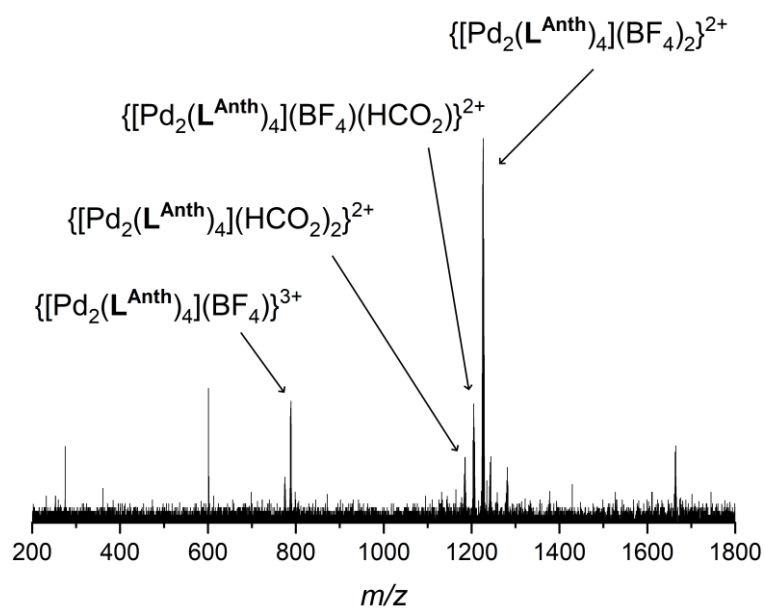

Figure S104 ESI-MS of  $[\text{Pd}_2(\text{L}^{\text{Anth}})_4](\text{BF}_4)_4$ .



## Comparison of L<sup>Bu</sup> and L<sup>Phth</sup> Self-assembly

L<sup>Bu</sup> + 0.25 eq. Pd(II)

L<sup>Bu</sup> (10.6 mg, 0.030 mmol, 2.0 eq.) and [Pd(CH<sub>3</sub>CN)<sub>4</sub>](BF<sub>4</sub>)<sub>2</sub> (3.3 mg, 0.0075 mmol, 1.0 eq.) were sonicated in d<sub>6</sub>-DMSO (0.75 mL) until all solids were dissolved, giving a light yellow solution.

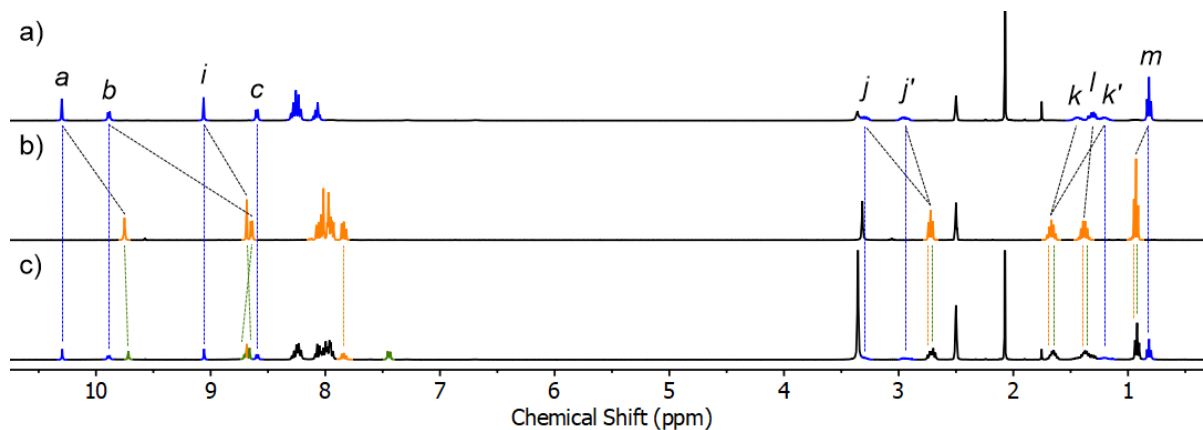

**Figure S105** <sup>1</sup>H NMR spectra (400 MHz, d<sub>6</sub>-DMSO) of a) [Pd<sub>2</sub>(L<sup>Bu</sup>)<sub>4</sub>](BF<sub>4</sub>)<sub>4</sub>, b) L<sup>Bu</sup>, and c) L<sup>Bu</sup> + 0.25 eq. Pd(II) ([L<sup>Bu</sup>] = 40 mM). Non-overlapping peaks have been colour-coded: [Pd<sub>2</sub>(L<sup>Bu</sup>)<sub>4</sub>](BF<sub>4</sub>)<sub>4</sub> = blue, L<sup>Bu</sup> = orange, [Pd(L<sup>Bu</sup>)<sub>4</sub>](BF<sub>4</sub>)<sub>2</sub> = green.

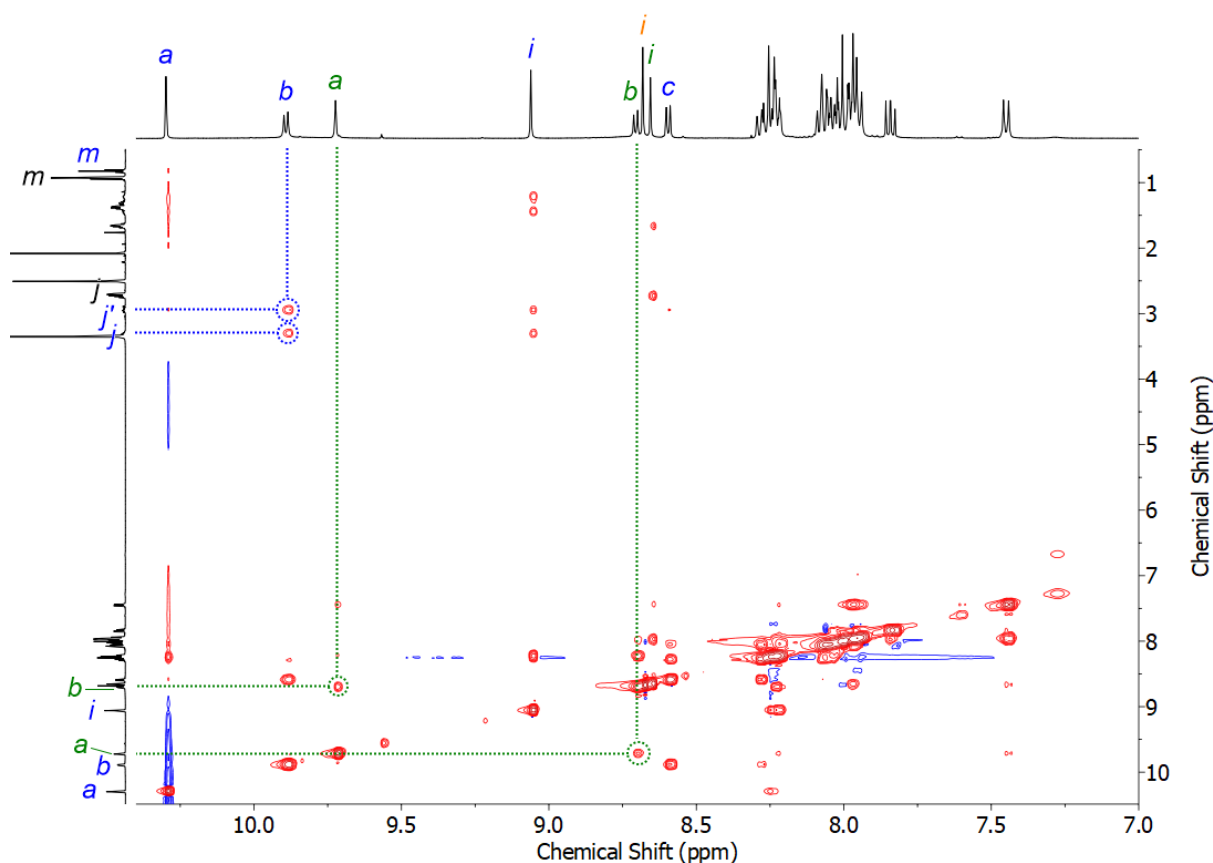

**Figure S106** NOESY NMR spectrum (500 MHz, d<sub>6</sub>-DMSO) of L<sup>Bu</sup> + 0.25 eq. Pd(II). Peak labels have been colour-coded: [Pd<sub>2</sub>(L<sup>Bu</sup>)<sub>4</sub>](BF<sub>4</sub>)<sub>4</sub> = blue, L<sup>Bu</sup> = orange, [Pd(L<sup>Bu</sup>)<sub>4</sub>](BF<sub>4</sub>)<sub>2</sub> = green.

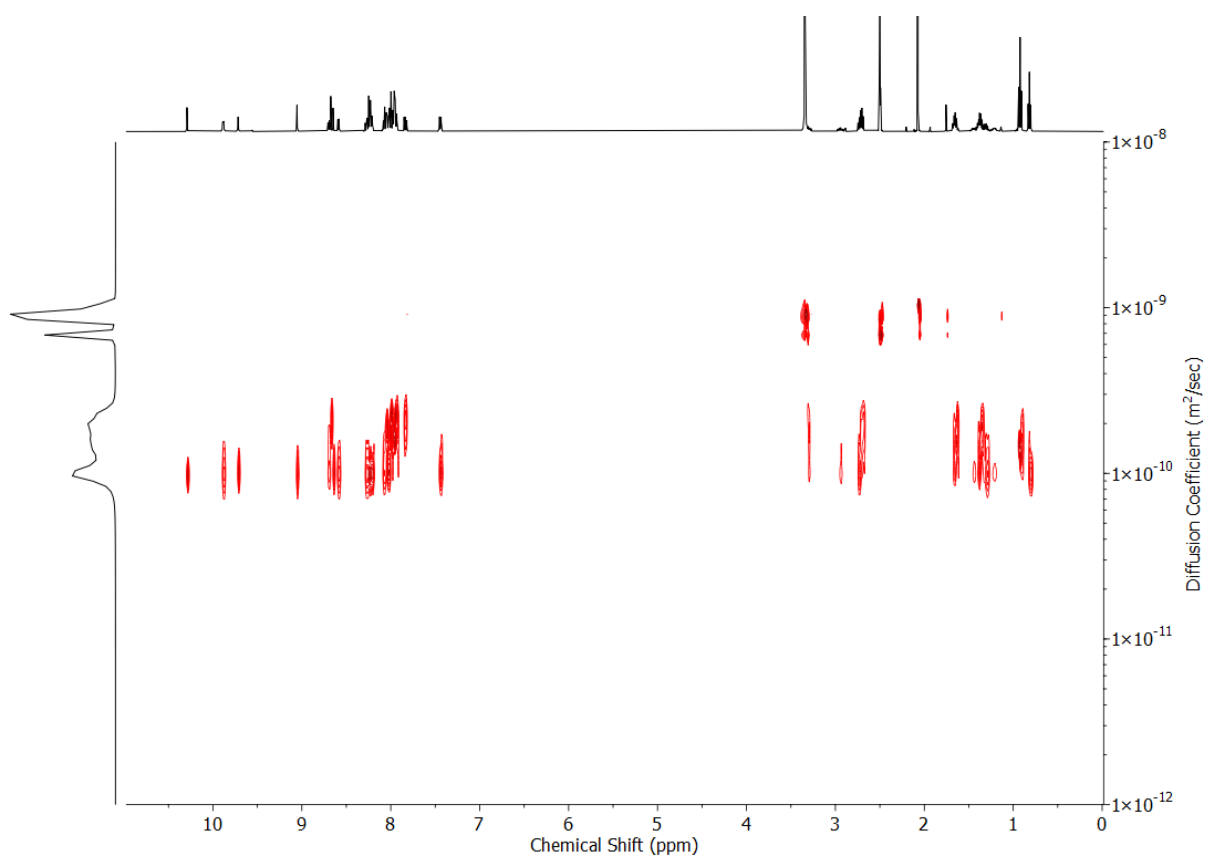

**Figure S107** DOSY NMR spectrum (500 MHz, *d*<sub>6</sub>-DMSO) of **L<sup>Bu</sup>** + 0.25 eq. Pd(II).

$L^{Phth} + 0.25 \text{ eq. Pd(II)}$

$L^{Phth}$  (13.7 mg, 0.030 mmol, 2.0 eq.) and  $[Pd(CH_3CN)_4](BF_4)_2$  (3.3 mg, 0.0075 mmol, 1.0 eq.) were sonicated in  $d_6$ -DMSO (0.75 mL) until all solids were dissolved, giving a light yellow solution.

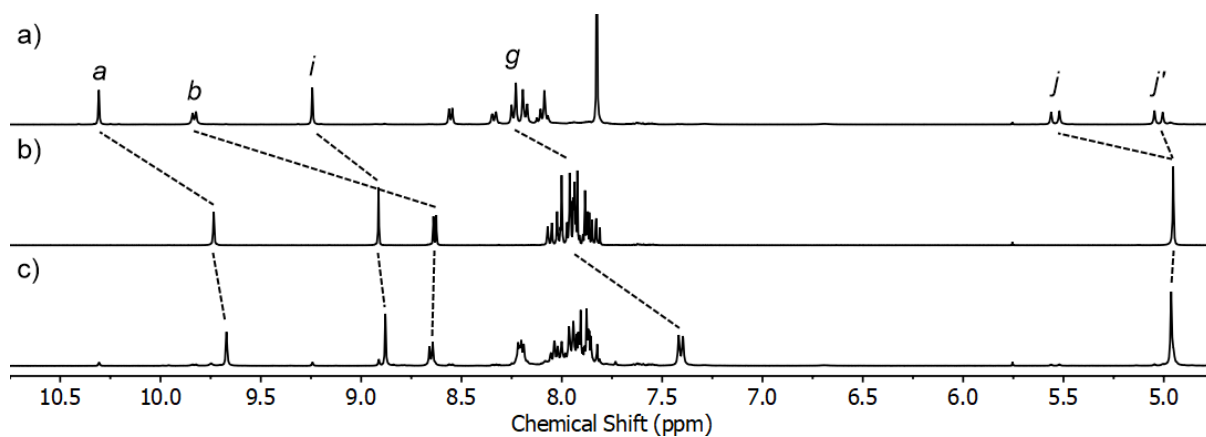

**Figure S108**  $^1H$  NMR spectra (400 MHz,  $d_6$ -DMSO) of a)  $[Pd_2(L^{Phth})_4](BF_4)_4$ , b)  $L^{Phth}$ , and c)  $[Pd(L^{Phth})_4](BF_4)_2$  ( $[L^{Phth}] = 40 \text{ mM}$ ).

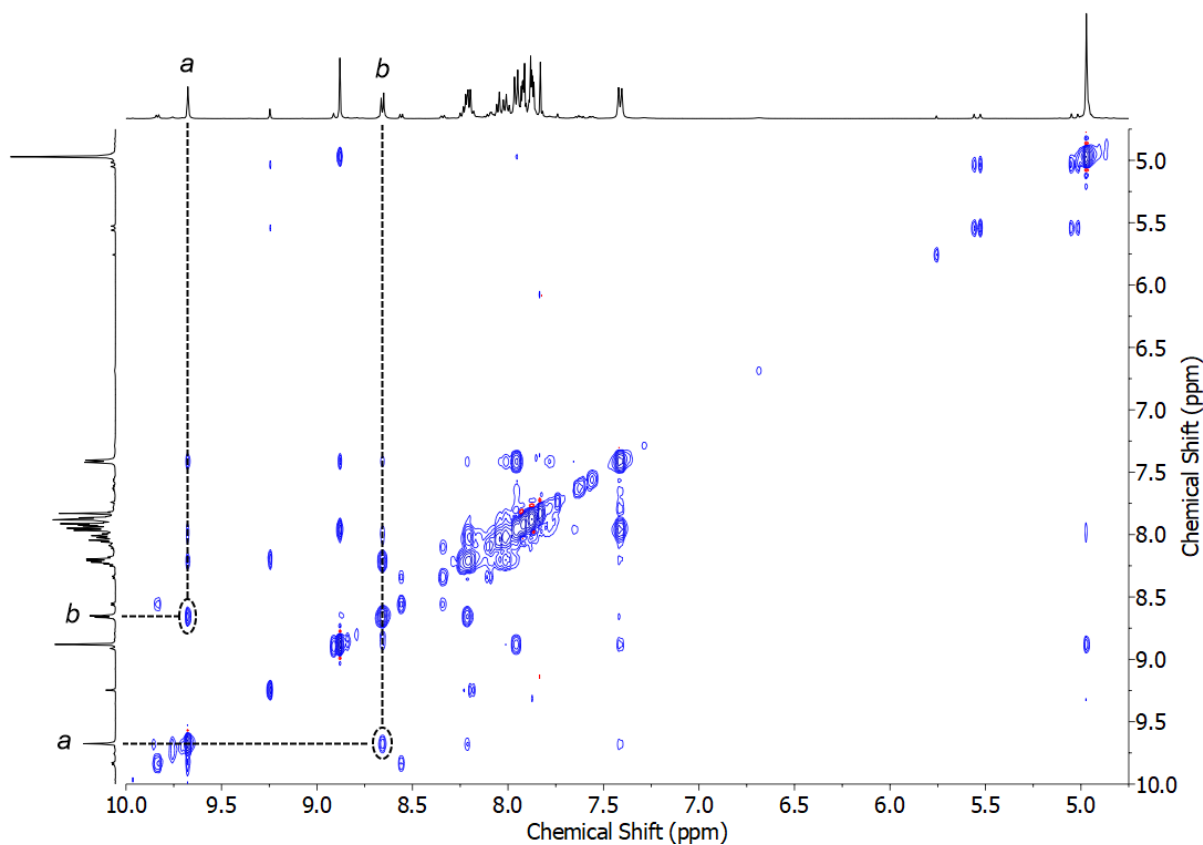

**Figure S109** NOESY NMR spectrum (500 MHz,  $d_6$ -DMSO) of  $[Pd(L^{Phth})_4](BF_4)_2$ .

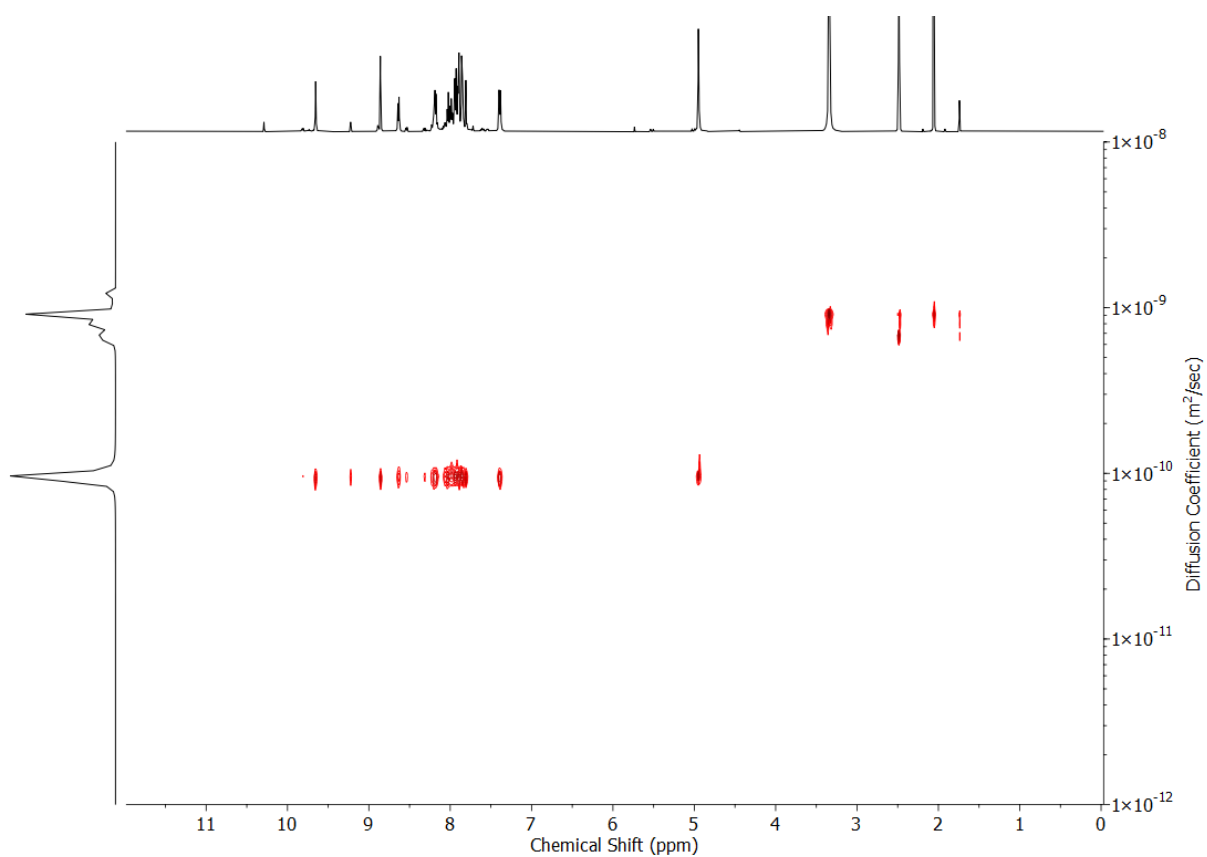

**Figure S110** DOSY NMR spectrum (500 MHz,  $d_6$ -DMSO) of  $[\text{Pd}(\text{L}^{\text{Phth}})_4](\text{BF}_4)_2$ .

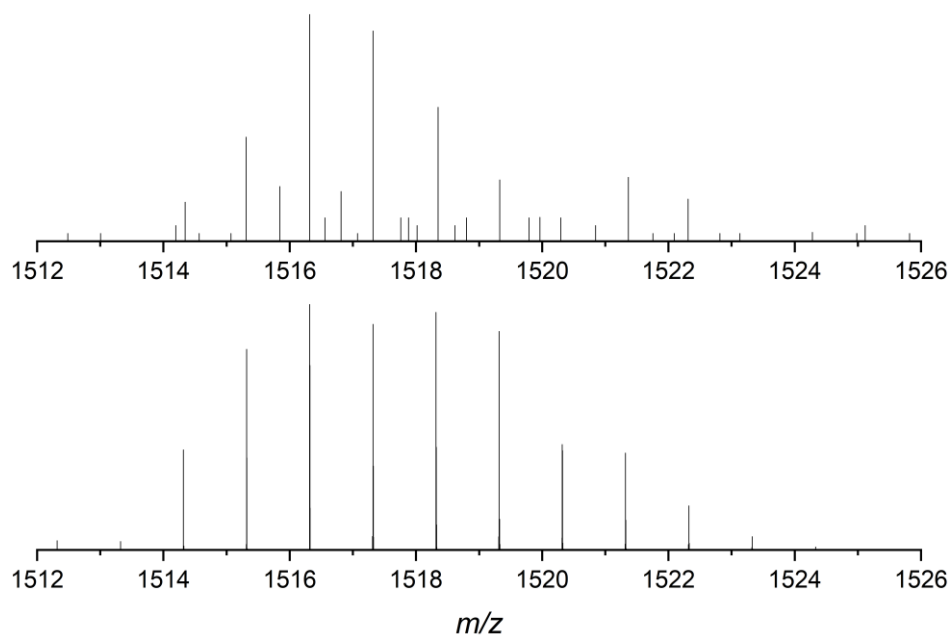

**Figure S111** Observed (top) and calculated (bottom) isotopic patterns for  $\{[\text{Pd}_2(\text{L}^{\text{Phth}})_3](\text{HCO}_2)\}^+$ .

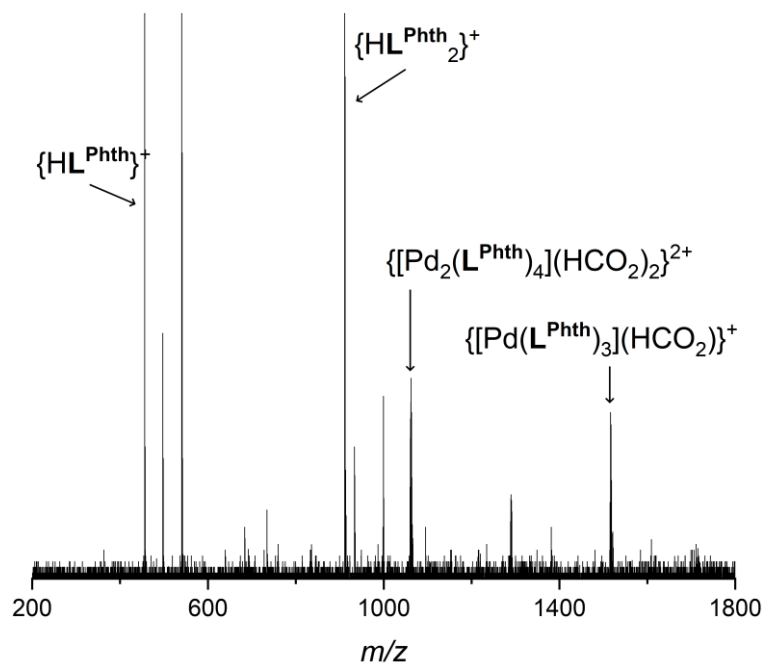

Figure S112 ESI-MS of  $[\text{Pd}(\text{L}^{\text{Phth}})_4](\text{BF}_4)_2$ .

## Model Mononuclear Complexes

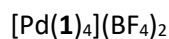

**1** (8.1 mg, 0.030 mmol, 4 eq.) and  $[\text{Pd}(\text{CH}_3\text{CN})_4](\text{BF}_4)_2$  (3.3 mg, 0.0075 mmol, 1 eq.) were sonicated in  $d_6$ -DMSO (0.75 mL) until all solids were dissolved, giving an orange solution. Quantitative conversion to  $[\text{Pd}(\mathbf{1})_4](\text{BF}_4)_2$  was observed by  $^1\text{H}$  NMR.

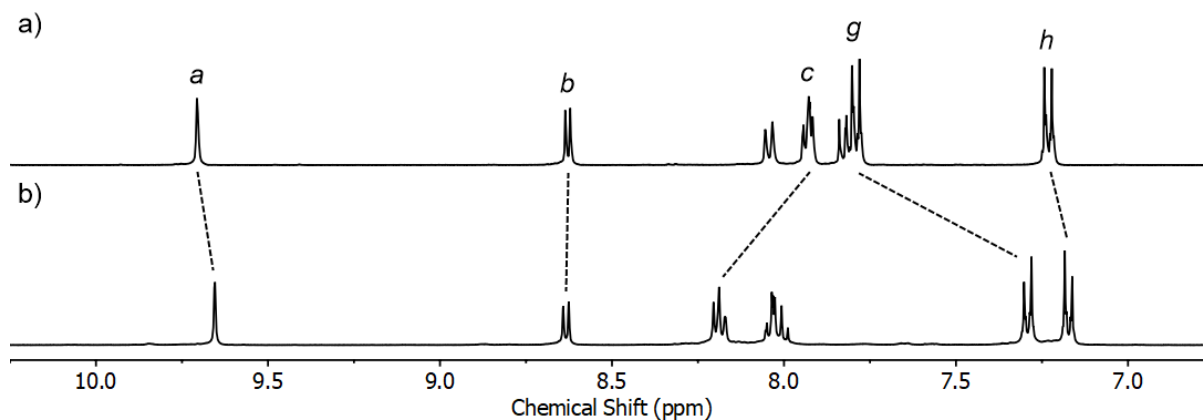

**Figure S113**  $^1\text{H}$  NMR spectrum (400 MHz,  $d_6$ -DMSO) of a) **1**, and b) **1** + 0.25 eq.  $\text{Pd}(\text{II})$  ( $[\mathbf{1}] = 40$  mM).

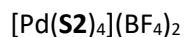

**S2** (7.3 mg, 0.030 mmol, 4 eq.) and  $[\text{Pd}(\text{CH}_3\text{CN})_4](\text{BF}_4)_2$  (3.3 mg, 0.0075 mmol, 1 eq.) were sonicated in  $d_6$ -DMSO (0.75 mL) until all solids were dissolved, giving an orange solution. Quantitative conversion to  $[\text{Pd}(\mathbf{S2})_4](\text{BF}_4)_2$  was observed by  $^1\text{H}$  NMR.

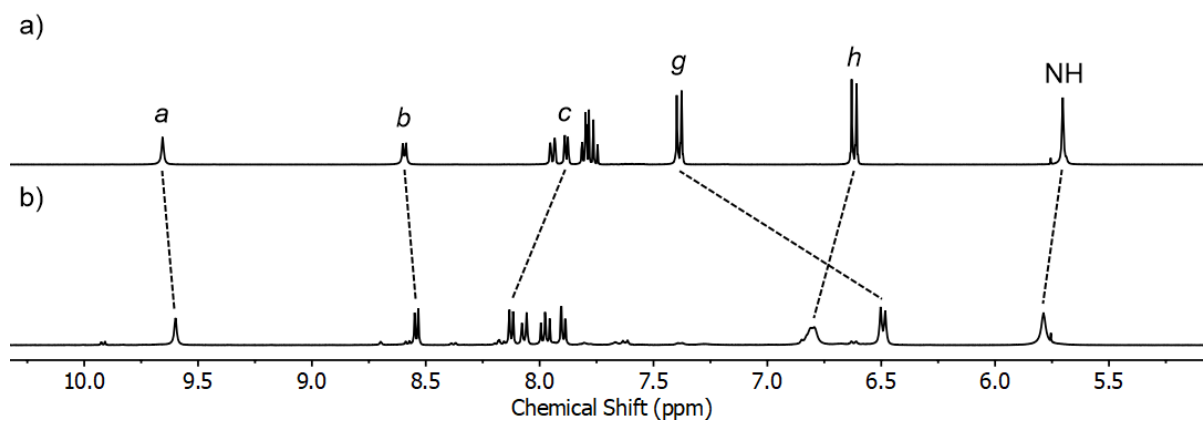

**Figure S114**  $^1\text{H}$  NMR spectrum (400 MHz,  $d_6$ -DMSO) of a) **S2**, and b) **S2** + 0.25 eq.  $\text{Pd}(\text{II})$  ( $[\mathbf{S2}] = 40$  mM).

## Combinatorial Libraries

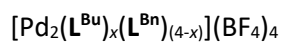

$\text{L}^{\text{Bu}}$  (5.3 mg, 0.015 mmol, 1 eq.),  $\text{L}^{\text{Bn}}$  (5.8 mg, 0.015 mmol, 1 eq.) and  $[\text{Pd}(\text{CH}_3\text{CN})_4](\text{BF}_4)_2$  (6.7 mg, 0.015 mmol, 1 eq.) were sonicated in  $d_6$ -DMSO (0.75 mL) until a homogenous solution was obtained.

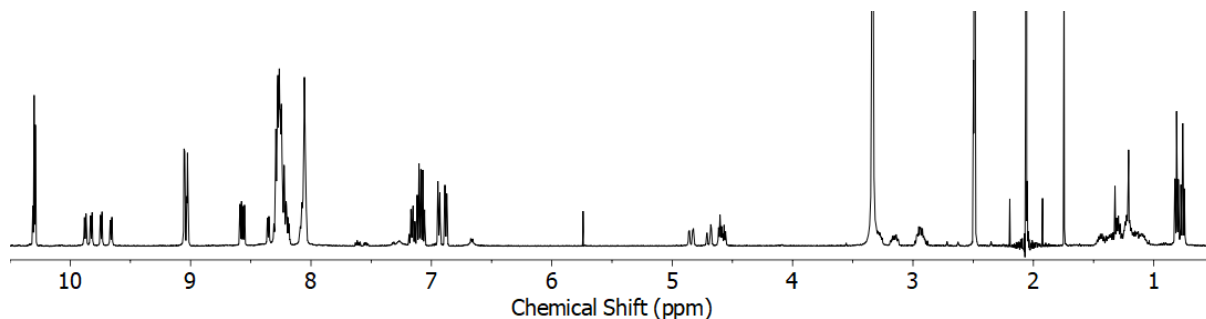

Figure S115  $^1\text{H}$  NMR spectrum (500 MHz,  $d_6$ -DMSO) of  $[\text{Pd}(\text{L}^{\text{Bu}})_x(\text{L}^{\text{Bn}})_{(4-x)}](\text{BF}_4)_4$ .

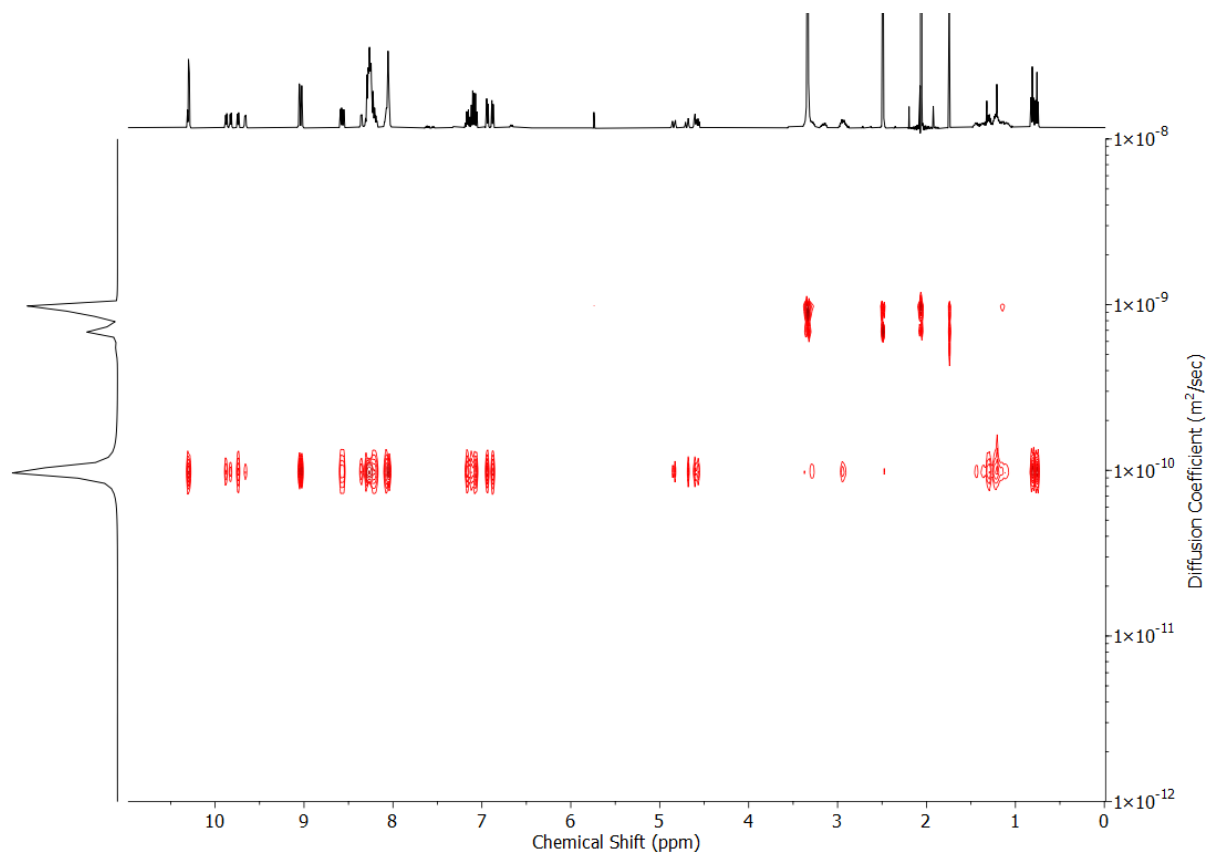

Figure S116 DOSY NMR ( $d_6$ -DMSO, 500 MHz) of  $[\text{Pd}_2(\text{L}^{\text{Bu}})_x(\text{L}^{\text{Bn}})_{(4-x)}](\text{BF}_4)_4$ .

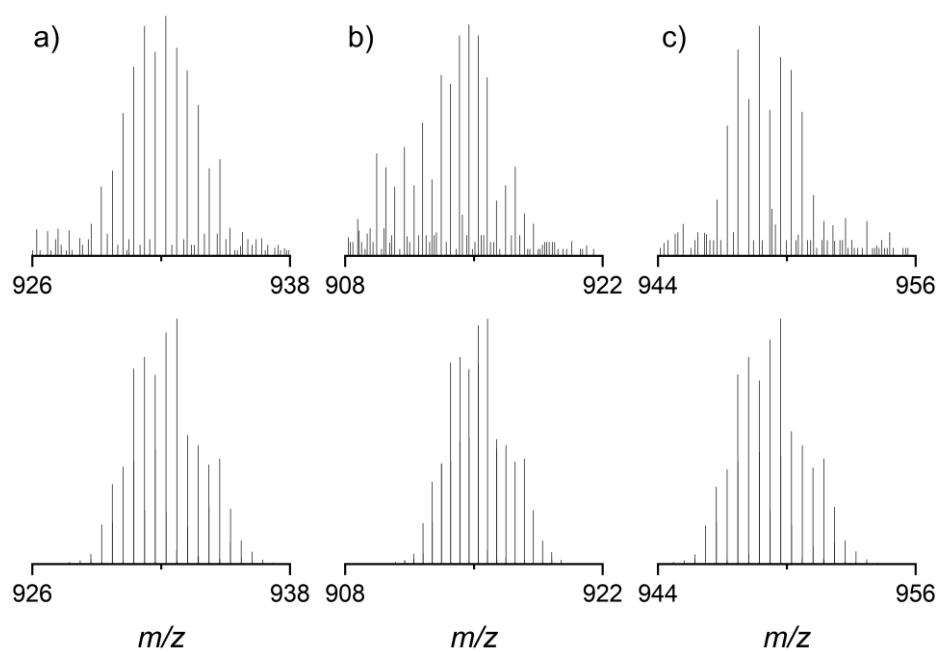

**Figure S117** Observed (top) and calculated (bottom) isotopic patterns for a)  $\{[\text{Pd}_2(\text{L}^{\text{Bu}})_3(\text{L}^{\text{Bn}})](\text{BF}_4)_2\}^{2+}$ ; b)  $\{[\text{Pd}_2(\text{L}^{\text{Bu}})_2(\text{L}^{\text{Bn}})_2](\text{BF}_4)_2\}^{2+}$ ; c)  $\{[\text{Pd}_2(\text{L}^{\text{Bu}})(\text{L}^{\text{Bn}})_3](\text{BF}_4)_2\}^{2+}$ .

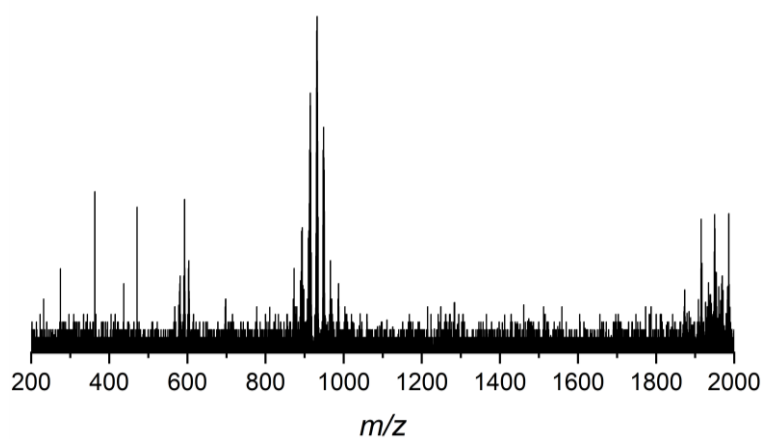

**Figure S118** ESI-MS of combinatorial library  $[\text{Pd}_2(\text{L}^{\text{Bu}})_x(\text{L}^{\text{Bn}})_{(4-x)}](\text{BF}_4)_4$ .



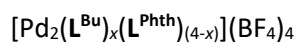

$\text{L}^{\text{Bu}}$  (10.6 mg, 0.030 mmol, 1 eq.),  $\text{L}^{\text{Phth}}$  (13.7 mg, 0.030 mmol) and  $[\text{Pd}(\text{CH}_3\text{CN})_4](\text{BF}_4)_2$  (13.3 mg, 0.030 mmol, 1 eq.) were sonicated in  $d_6$ -DMSO (0.75 mL) until a homogenous solution was obtained.

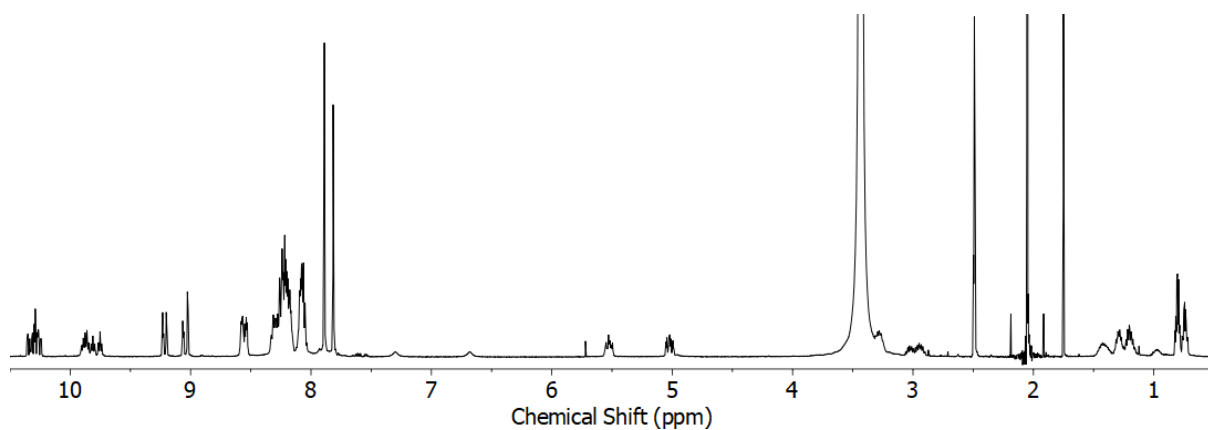

Figure S119  $^1\text{H}$  NMR spectrum (500 MHz,  $d_6$ -DMSO) of  $[\text{Pd}(\text{L}^{\text{Bu}})_x(\text{L}^{\text{Phth}})_{(4-x)}](\text{BF}_4)_4$ .

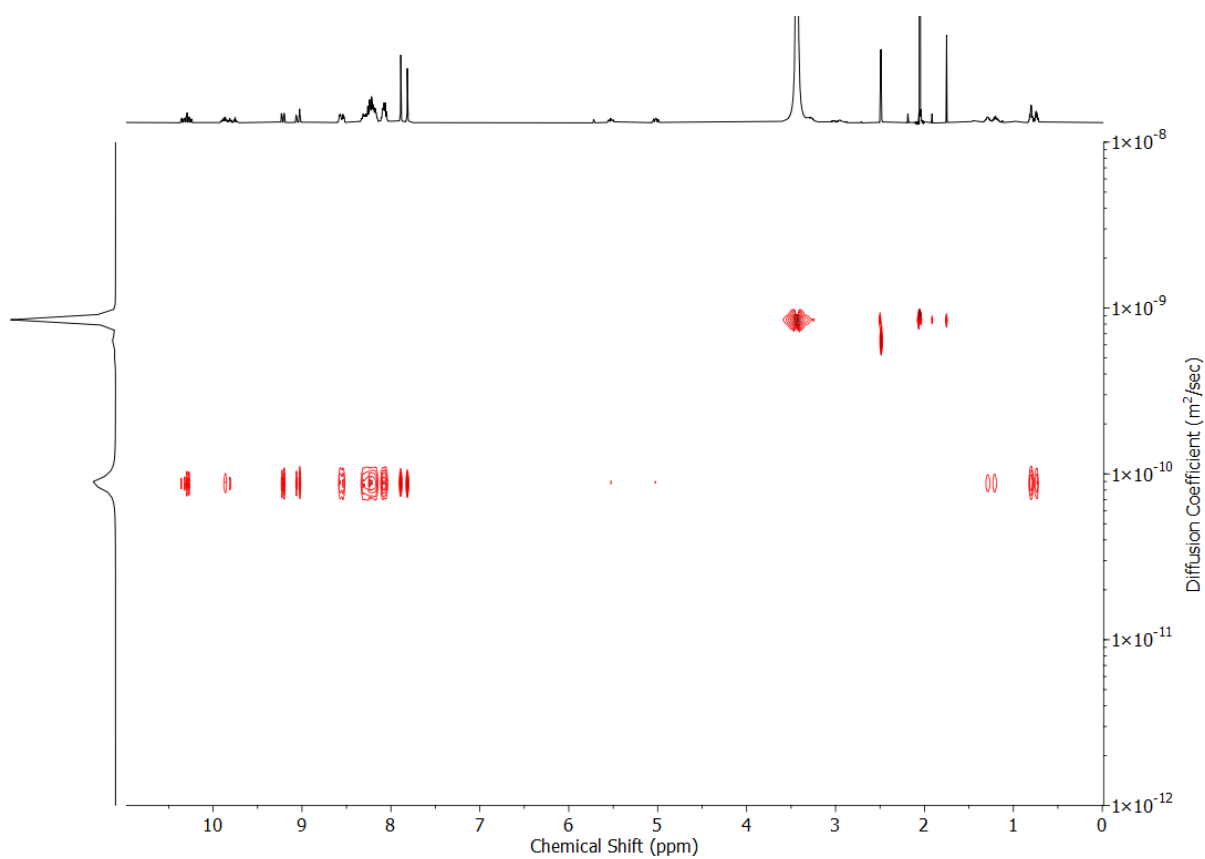

Figure S120 DOSY NMR ( $d_6$ -DMSO, 500 MHz) of  $[\text{Pd}_2(\text{L}^{\text{Bu}})_x(\text{L}^{\text{Phth}})_{(4-x)}](\text{BF}_4)_4$ .

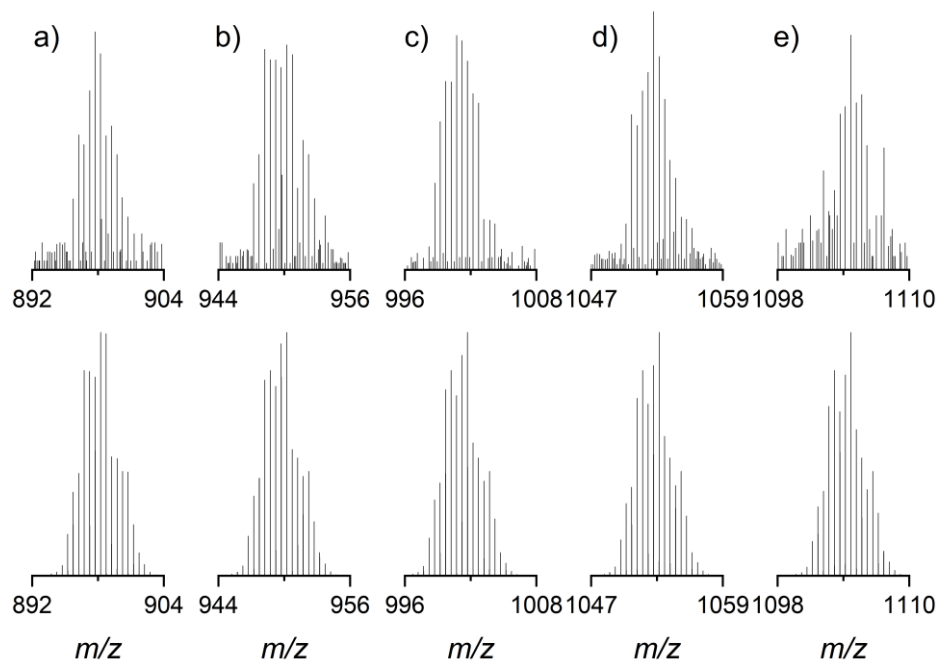

**Figure S121** Observed (top) and calculated (bottom) isotopic patterns for a)  $\{[\text{Pd}_2(\text{L}^{\text{Bu}})_4](\text{BF}_4)_2\}^{2+}$ ; b)  $\{[\text{Pd}_2(\text{L}^{\text{Bu}})_3(\text{L}^{\text{Phth}})](\text{BF}_4)_2\}^{2+}$ ; c)  $\{[\text{Pd}_2(\text{L}^{\text{Bu}})_2(\text{L}^{\text{Phth}})_2](\text{BF}_4)_2\}^{2+}$ ; d)  $\{[\text{Pd}_2(\text{L}^{\text{Bu}})(\text{L}^{\text{Phth}})_3](\text{BF}_4)_2\}^{2+}$ ; e)  $\{[\text{Pd}_2(\text{L}^{\text{Bu}})(\text{L}^{\text{Phth}})_4](\text{BF}_4)_2\}^{2+}$ .

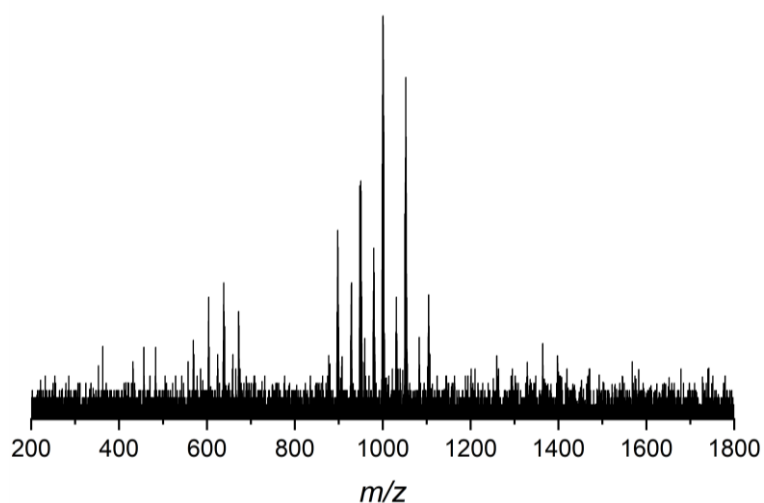

**Figure S122** ESI-MS of combinatorial library  $[\text{Pd}_2(\text{L}^{\text{Bu}})_x(\text{L}^{\text{Phth}})_{(4-x)}](\text{BF}_4)_4$ .

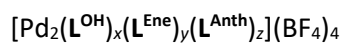

$\text{L}^{\text{OH}}$  (7.4 mg, 0.020 mmol, 1 eq.),  $\text{L}^{\text{Phth}}$  (9.1 mg, 0.020 mmol, 1 eq.),  $\text{L}^{\text{Anth}}$  (10.3 mg, 0.020 mmol, 1 eq.) and  $[\text{Pd}(\text{CH}_3\text{CN})_4](\text{BF}_4)_2$  (13.3 mg, 0.030 mmol, 1.5 eq.) were sonicated in  $d_6$ -DMSO (1.5 mL) until a homogenous solution was obtained.

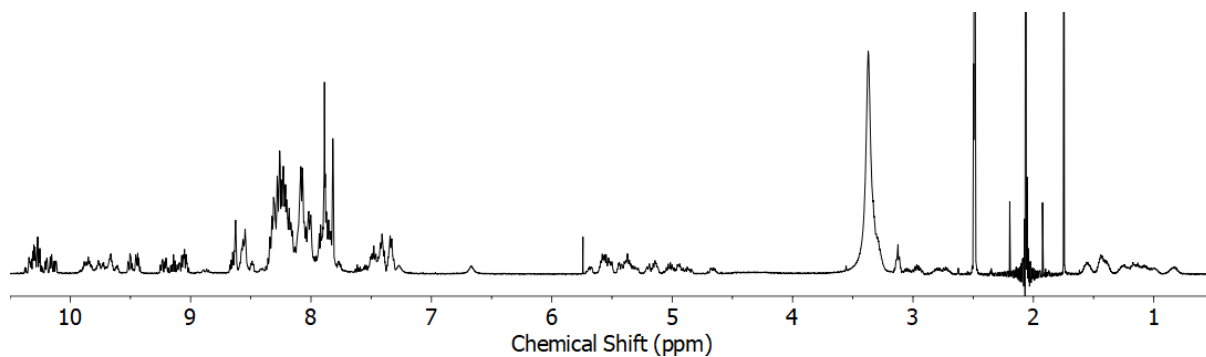

Figure S123  $^1\text{H}$  NMR spectrum (500 MHz,  $d_6$ -DMSO) of  $[\text{Pd}(\text{L}^{\text{OH}})_x(\text{L}^{\text{Ene}})_y(\text{L}^{\text{Anth}})_z](\text{BF}_4)_4$ .

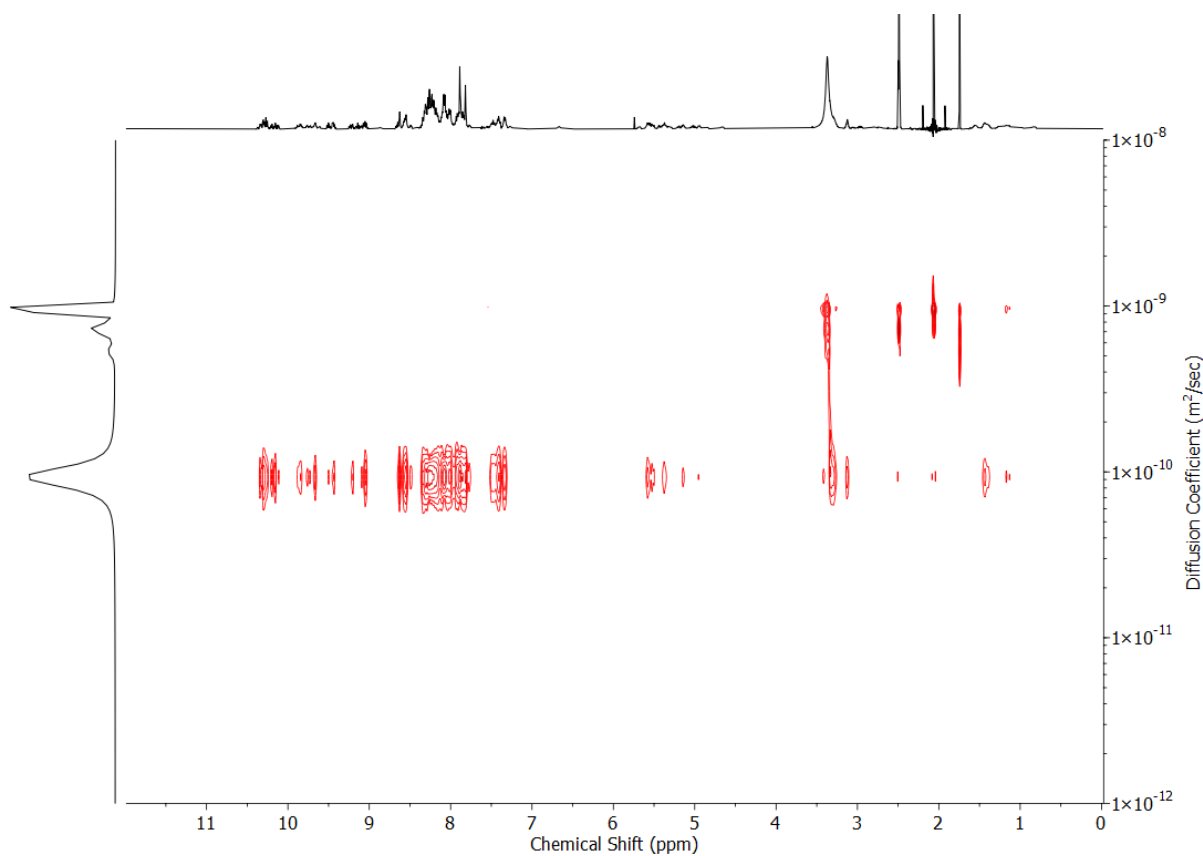

Figure S124 DOSY NMR ( $d_6$ -DMSO, 500 MHz) of  $[\text{Pd}_2(\text{L}^{\text{OH}})_x(\text{L}^{\text{Ene}})_y(\text{L}^{\text{Anth}})_z](\text{BF}_4)_4$ .

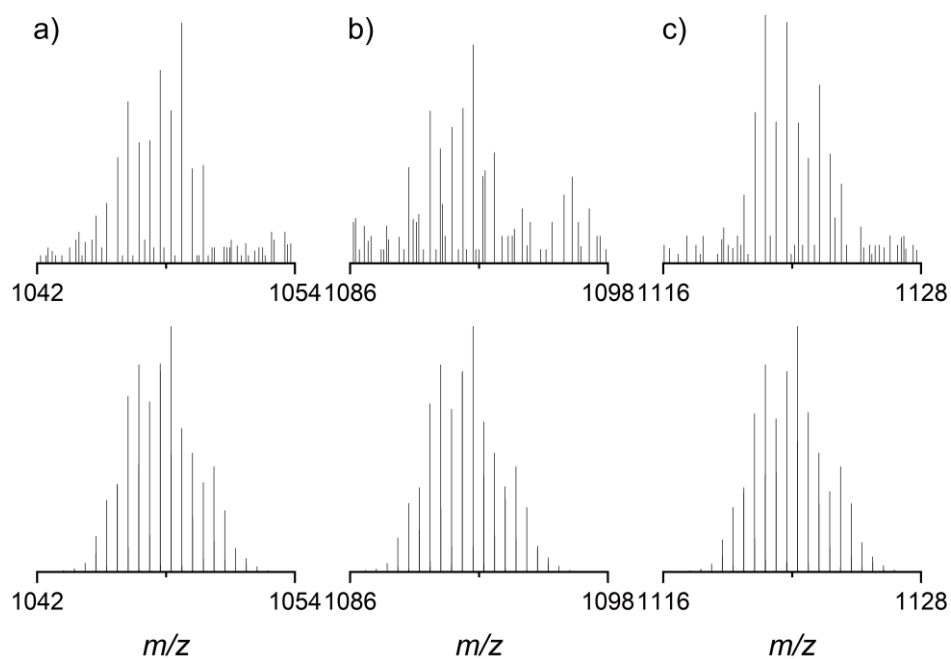

**Figure S125** Observed (top) and calculated (bottom) isotopic patterns for a)  $\{[\text{Pd}_2(\text{L}^{\text{OH}})_2(\text{L}^{\text{Phth}})(\text{L}^{\text{Anth}})](\text{BF}_4)_2\}^{2+}$ ; b)  $\{[\text{Pd}_2(\text{L}^{\text{OH}})(\text{L}^{\text{Phth}})_2(\text{L}^{\text{Anth}})](\text{BF}_4)_2\}^{2+}$ ; c)  $\{[\text{Pd}_2(\text{L}^{\text{OH}})(\text{L}^{\text{Phth}})(\text{L}^{\text{Anth}})_2](\text{BF}_4)_2\}^{2+}$ .

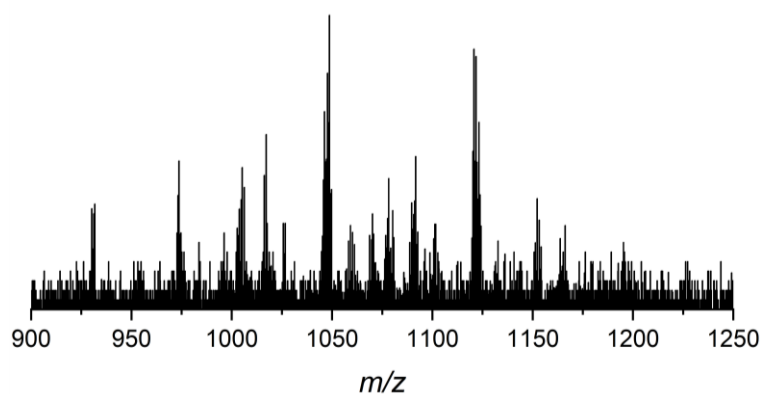

**Figure S126** Partial ESI-MS of combinatorial library  $[\text{Pd}_2(\text{L}^{\text{OH}})_x(\text{L}^{\text{Phth}})_y(\text{L}^{\text{Anth}})_z](\text{BF}_4)_4$ .

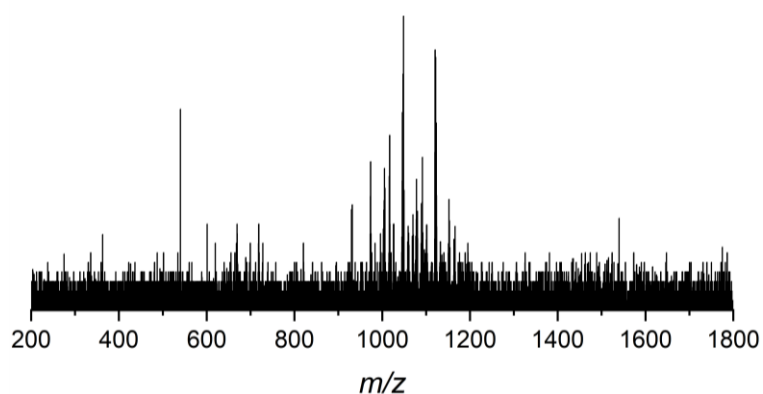

**Figure S127** ESI-MS of combinatorial library  $[\text{Pd}_2(\text{L}^{\text{OH}})_x(\text{L}^{\text{Phth}})_y(\text{L}^{\text{Anth}})_z](\text{BF}_4)_4$ .

**Table S1** List of number of possible isomers for homoleptic, and binary and ternary heteroleptic *cis*-Pd<sub>2</sub>L<sub>4</sub> cages.

| Cage         | L <sup>1</sup> | L <sup>2</sup> | L <sup>3</sup> | Number of diastereomers | Total number of isomers |
|--------------|----------------|----------------|----------------|-------------------------|-------------------------|
| 1            | 4              | 0              | 0              | 1                       | 1                       |
| 2            | 0              | 4              | 0              | 1                       | 1                       |
| 3            | 0              | 0              | 4              | 1                       | 1                       |
| 4            | 3              | 1              | 0              | 1                       | 2                       |
| 5            | 3              | 0              | 1              | 1                       | 2                       |
| 6            | 1              | 3              | 0              | 1                       | 2                       |
| 7            | 0              | 3              | 1              | 1                       | 2                       |
| 8            | 1              | 0              | 3              | 1                       | 2                       |
| 9            | 0              | 1              | 3              | 1                       | 2                       |
| 10           | 2              | 2              | 0              | 3                       | 4                       |
| 11           | 2              | 0              | 2              | 3                       | 4                       |
| 12           | 0              | 2              | 2              | 3                       | 4                       |
| 13           | 2              | 1              | 1              | 3                       | 6                       |
| 14           | 1              | 2              | 1              | 3                       | 6                       |
| 15           | 1              | 1              | 2              | 3                       | 6                       |
| <b>Total</b> |                |                |                |                         | <b>47</b>               |

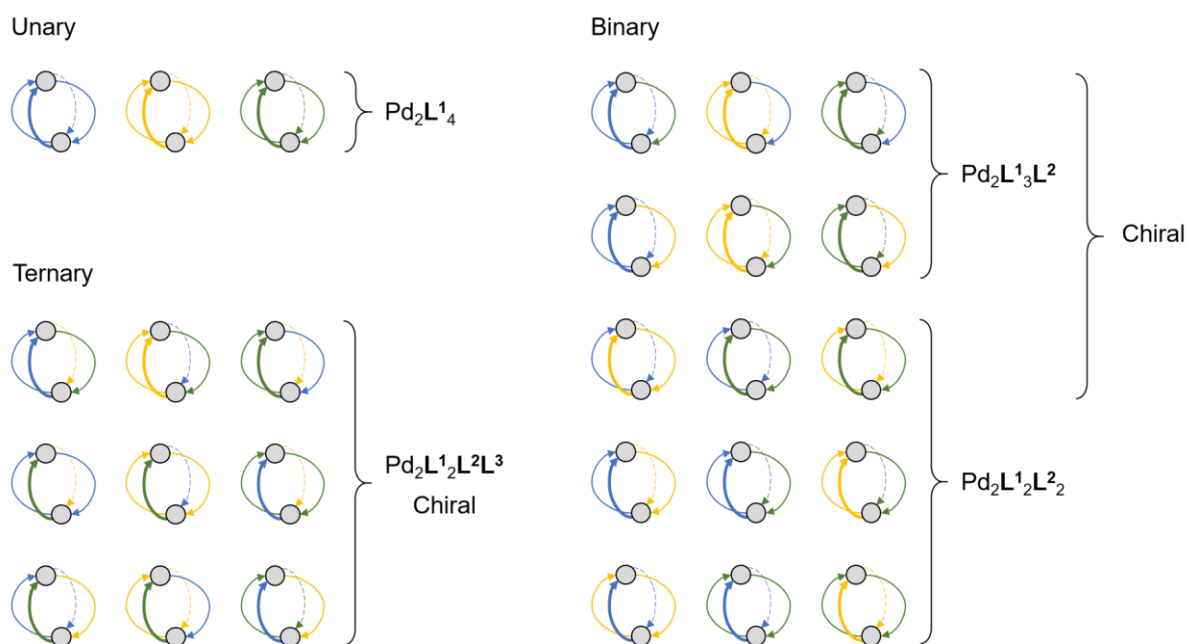

**Figure 128** Cartoon representation of possible isomers for homoleptic, and binary and ternary heteroleptic *cis*-Pd<sub>2</sub>L<sub>4</sub> cages

## Geometry Optimised Structures

Molecular mechanics models were constructed using Avogadro<sup>[2]</sup> and energy-minimised using UFF.<sup>[3]</sup> Geometry optimisations were subsequently performed using the semi-empirical method PM6<sup>[4]</sup> in Gaussian 16.<sup>[5]</sup>

**Table S2** Results summary for structure optimisation of "All up" [Pd<sub>2</sub>(L<sup>Me</sup>)]<sup>4+</sup>

|                                                                           |                                                 |
|---------------------------------------------------------------------------|-------------------------------------------------|
| Calculation Type = FOPT                                                   | Maximum force = 0 Converged                     |
| Calculation Method = RPM6                                                 | RMS force = 0 Converged                         |
| Formula = C <sub>80</sub> H <sub>56</sub> N <sub>16</sub> Pd <sub>2</sub> | Maximum displacement = 4.1e-05 Converged        |
| Basis Set = ZDO                                                           | RMS displacement = 7e-06 Converged              |
| Charge = 4                                                                | Predicted energy change = -4.950729e-12 Hartree |
| Spin = Singlet                                                            |                                                 |
| Solvation = None                                                          |                                                 |
| E(RPM6) = 2.3382136 Hartree                                               |                                                 |
| RMS Gradient Norm = 2.9e-08 Hartree/Bohr                                  |                                                 |
| Imaginary Freq =                                                          |                                                 |
| Dipole Moment = 0.4512 Debye                                              |                                                 |
| Point Group = C1                                                          |                                                 |
| Molecular Mass = 1452.2943 amu                                            |                                                 |

**Table S3** Results summary for structure optimisation of "Three-up-one-down" [Pd<sub>2</sub>(L<sup>Me</sup>)]<sup>4+</sup>

|                                                                           |                                                 |
|---------------------------------------------------------------------------|-------------------------------------------------|
| Calculation Type = FOPT                                                   | Maximum force = 2e-06 Converged                 |
| Calculation Method = RPM6                                                 | RMS force = 0 Converged                         |
| Formula = C <sub>80</sub> H <sub>56</sub> N <sub>16</sub> Pd <sub>2</sub> | Maximum displacement = 5.7e-05 Converged        |
| Basis Set = ZDO                                                           | RMS displacement = 9e-06 Converged              |
| Charge = 4                                                                | Predicted energy change = -4.734033e-12 Hartree |
| Spin = Singlet                                                            |                                                 |
| Solvation = None                                                          |                                                 |
| E(RPM6) = 2.2786545 Hartree                                               |                                                 |
| RMS Gradient Norm = 4.6e-08 Hartree/Bohr                                  |                                                 |
| Imaginary Freq =                                                          |                                                 |
| Dipole Moment = 1.4818913 Debye                                           |                                                 |
| Point Group = C1                                                          |                                                 |
| Molecular Mass = 1452.2943 amu                                            |                                                 |

**Table S4** Results summary for structure optimisation of *trans*-[Pd<sub>2</sub>(L<sup>Me</sup>)]<sup>4+</sup>

|                                                                           |                                                 |
|---------------------------------------------------------------------------|-------------------------------------------------|
| Calculation Type = FOPT                                                   | Maximum force = 2e-06 Converged                 |
| Calculation Method = RPM6                                                 | RMS force = 0 Converged                         |
| Formula = C <sub>80</sub> H <sub>56</sub> N <sub>16</sub> Pd <sub>2</sub> | Maximum displacement = 4.9e-05 Converged        |
| Basis Set = ZDO                                                           | RMS displacement = 6e-06 Converged              |
| Charge = 4                                                                | Predicted energy change = -4.097872e-12 Hartree |
| Spin = Singlet                                                            |                                                 |
| Solvation = None                                                          |                                                 |
| E(RPM6) = 2.2642098 Hartree                                               |                                                 |
| RMS Gradient Norm = 4.3e-08 Hartree/Bohr                                  |                                                 |
| Imaginary Freq =                                                          |                                                 |
| Dipole Moment = 0.0006 Debye                                              |                                                 |
| Point Group = C1                                                          |                                                 |
| Molecular Mass = 1452.2943 amu                                            |                                                 |

**Table S5** Results summary for structure optimisation of *cis*-[Pd<sub>2</sub>(L<sup>Me</sup>)]<sup>4+</sup>

|                                                                           |                                                |
|---------------------------------------------------------------------------|------------------------------------------------|
| Calculation Type = FOPT                                                   | Maximum force = 4e-06 Converged                |
| Calculation Method = RPM6                                                 | RMS force = 0 Converged                        |
| Formula = C <sub>80</sub> H <sub>56</sub> N <sub>16</sub> Pd <sub>2</sub> | Maximum displacement = 6e-05 Converged         |
| Basis Set = ZDO                                                           | RMS displacement = 8e-06 Converged             |
| Charge = 4                                                                | Predicted energy change = -1.36126e-11 Hartree |
| Spin = Singlet                                                            |                                                |
| Solvation = None                                                          |                                                |
| E(RPM6) = 2.2273589 Hartree                                               |                                                |
| RMS Gradient Norm = 1.24e-07 Hartree/Bohr                                 |                                                |
| Imaginary Freq =                                                          |                                                |
| Dipole Moment = 0.0002 Debye                                              |                                                |
| Point Group = C1                                                          |                                                |
| Molecular Mass = 1452.2943 amu                                            |                                                |

## Solvodynamic Radii Calculations

Solvodynamic radii were calculated using a variation of the Stokes-Einstein equation:

$$R_S = \frac{k_B T}{6\pi\eta D}$$

Where  $R_S$  is the solvodynamic radius (m)

$k_B$  is the Boltzmann constant ( $1.38 \times 10^{-23} \text{ J K}^{-1}$ )

$T$  is the temperature (K)

$\eta$  is the solvent viscosity ( $2.180 \times 10^{-3} \text{ kg s}^{-1}\text{m}^{-1}$  for  $d_6$ -DMSO)<sup>[6]</sup>

$D$  is the diffusion coefficient ( $\text{m}^2\text{s}^{-1}$ )

**Table S6** Calculated solvodynamic radii

| Cage                                                                                                       | $D$ ( $\text{m}^2\text{s}^{-1}$ ) | $R_S$ (Å) |
|------------------------------------------------------------------------------------------------------------|-----------------------------------|-----------|
| $[\text{Pd}_2(\text{L}^{\text{Bu}})_4](\text{BF}_4)_4$                                                     | $1.03 \times 10^{-10}$            | 9.7       |
| $[\text{Pd}_2(\text{L}^{\text{Bn}})_4](\text{BF}_4)_4$                                                     | $9.53 \times 10^{-11}$            | 10.5      |
| $[\text{Pd}_2(\text{L}^{\text{OH}})_4](\text{BF}_4)_4$                                                     | $9.64 \times 10^{-11}$            | 10.4      |
| $[\text{Pd}_2(\text{L}^{\text{Ene}})_4](\text{BF}_4)_4$                                                    | $9.89 \times 10^{-11}$            | 10.1      |
| $[\text{Pd}_2(\text{L}^{\text{Phth}})_4](\text{BF}_4)_4$                                                   | $8.89 \times 10^{-11}$            | 11.3      |
| $[\text{Pd}_2(\text{L}^{\text{Anth}})_4](\text{BF}_4)_4$                                                   | $9.07 \times 10^{-11}$            | 11.0      |
| $[\text{Pd}_2(\text{L}^{\text{Bu}})_x(\text{L}^{\text{Bn}})_{(4-x)}](\text{BF}_4)_4$                       | $9.98 \times 10^{-11}$            | 10.0      |
| $[\text{Pd}_2(\text{L}^{\text{Bu}})_x(\text{L}^{\text{Phth}})_{(4-x)}](\text{BF}_4)_4$                     | $8.90 \times 10^{-11}$            | 11.3      |
| $[\text{Pd}_2(\text{L}^{\text{OH}})_x(\text{L}^{\text{Phth}})_y(\text{L}^{\text{Anth}})_z](\text{BF}_4)_4$ | $9.20 \times 10^{-11}$            | 10.9      |



## Proton Affinity Calculations

$$PA = -\Delta H = -((\varepsilon_0 + H_{corr})_{BH^+} - (\varepsilon_0 + H_{corr})_B)$$

|                                      | $\varepsilon_0 + H_{corr}$ | PA (kJ mol <sup>-1</sup> ) |
|--------------------------------------|----------------------------|----------------------------|
| <b>L<sup>Bu</sup></b>                | -1107.0432                 | 1118                       |
| <b>L<sup>Bu</sup>H<sup>+</sup></b>   | -1107.4689                 |                            |
| <b>L<sup>Phth</sup></b>              | -1500.9847                 | 1102                       |
| <b>L<sup>Phth</sup>H<sup>+</sup></b> | -1501.4043                 |                            |

**Table S7** Results summary for structure optimisation and frequency calculation of **L<sup>Bu</sup>**

|                                                          |                                                          |
|----------------------------------------------------------|----------------------------------------------------------|
| Calculation Type = FREQ                                  | Imaginary Freq = 0                                       |
| Calculation Method = RB3LYP                              | Temperature = 298.15 Kelvin                              |
| Formula = C <sub>23</sub> H <sub>20</sub> N <sub>4</sub> | Pressure = 1 atm                                         |
| Basis Set = 6-31G(d)                                     | Frequencies scaled by = 1                                |
| Charge = 0                                               | Electronic Energy (EE) = -1107.447 Hartree               |
| Spin = Singlet                                           | Zero-point Energy Correction = 0.37977 Hartree           |
| Solvation = scrf=solvent=dms0                            | Thermal Correction to Energy = 0.402865 Hartree          |
| E(RB3LYP) = -1107.447 Hartree                            | Thermal Correction to Enthalpy = 0.40381 Hartree         |
| RMS Gradient Norm = 1.73e-07 Hartree/Bohr                | Thermal Correction to Free Energy = 0.321838 Hartree     |
| Imaginary Freq = 0                                       | EE + Zero-point Energy = -1107.0672 Hartree              |
| Dipole Moment = 4.1639731 Debye                          | EE + Thermal Energy Correction = -1107.0441 Hartree      |
| Polarizability (?) = 414.172 a.u.                        | EE + Thermal Enthalpy Correction = -1107.0432 Hartree    |
| Point Group = C1                                         | EE + Thermal Free Energy Correction = -1107.1252 Hartree |
| Molecular Mass = 352.1688 amu                            | E (Thermal) = 252.802 kcal/mol                           |
|                                                          | Heat Capacity (Cv) = 88.537 cal/mol-kelvin               |
|                                                          | Entropy (S) = 172.523 cal/mol-kelvin                     |
| Maximum force = 0 Converged                              |                                                          |
| RMS force = 0 Converged                                  |                                                          |
| Maximum displacement = 5e-05 Converged                   |                                                          |
| RMS displacement = 1.1e-05 Converged                     |                                                          |
| Predicted energy change = -8.511519e-13 Hartree          |                                                          |

**Table S8** Results summary for structure optimisation and frequency calculation of **L<sup>Bu</sup>H<sup>+</sup>**

|                                                          |                                                          |
|----------------------------------------------------------|----------------------------------------------------------|
| Calculation Type = FREQ                                  | Imaginary Freq = 0                                       |
| Calculation Method = RB3LYP                              | Temperature = 298.15 Kelvin                              |
| Formula = C <sub>23</sub> H <sub>21</sub> N <sub>4</sub> | Pressure = 1 atm                                         |
| Basis Set = 6-31G(d)                                     | Frequencies scaled by = 1                                |
| Charge = 1                                               | Electronic Energy (EE) = -1107.8871 Hartree              |
| Spin = Singlet                                           | Zero-point Energy Correction = 0.394159 Hartree          |
| Solvation = scrf=solvent=dms0                            | Thermal Correction to Energy = 0.41721 Hartree           |
| E(RB3LYP) = -1107.8871 Hartree                           | Thermal Correction to Enthalpy = 0.418165 Hartree        |
| RMS Gradient Norm = 1.574e-06 Hartree/Bohr               | Thermal Correction to Free Energy = 0.337583 Hartree     |
| Imaginary Freq = 0                                       | EE + Zero-point Energy = -1107.4929 Hartree              |
| Dipole Moment = 20.039729 Debye                          | EE + Thermal Energy Correction = -1107.4699 Hartree      |
| Polarizability (?) = 414.80167 a.u.                      | EE + Thermal Enthalpy Correction = -1107.4689 Hartree    |
| Point Group = C1                                         | EE + Thermal Free Energy Correction = -1107.5495 Hartree |
| Molecular Mass = 353.17662 amu                           | E (Thermal) = 261.81 kcal/mol                            |
|                                                          | Heat Capacity (Cv) = 89.126 cal/mol-kelvin               |
|                                                          | Entropy (S) = 169.599 cal/mol-kelvin                     |
| Maximum force = 0 Converged                              |                                                          |
| RMS force = 0 Converged                                  |                                                          |
| Maximum displacement = 2e-05 Converged                   |                                                          |
| RMS displacement = 5e-06 Converged                       |                                                          |
| Predicted energy change = -4.137923e-13 Hartree          |                                                          |

**Table S9** Results summary for structure optimisation and frequency calculation of **L<sup>Phth</sup>**

|                                                                         |                                                          |
|-------------------------------------------------------------------------|----------------------------------------------------------|
| Calculation Type = FREQ                                                 | Imaginary Freq = 0                                       |
| Calculation Method = RB3LYP                                             | Temperature = 298.15 Kelvin                              |
| Formula = C <sub>28</sub> H <sub>17</sub> N <sub>5</sub> O <sub>2</sub> | Pressure = 1 atm                                         |
| Basis Set = 6-31G(d)                                                    | Frequencies scaled by = 1                                |
| Charge = 0                                                              | Electronic Energy (EE) = -1501.4039 Hartree              |
| Spin = Singlet                                                          | Zero-point Energy Correction = 0.391245 Hartree          |
| Solvation = scrf=solvent=dms0                                           | Thermal Correction to Energy = 0.418173 Hartree          |
| E(RB3LYP) = -1501.4039 Hartree                                          | Thermal Correction to Enthalpy = 0.419117 Hartree        |
| RMS Gradient Norm = 4.25e-07 Hartree/Bohr                               | Thermal Correction to Free Energy = 0.327205 Hartree     |
| Imaginary Freq = 0                                                      | EE + Zero-point Energy = -1501.0126 Hartree              |
| Dipole Moment = 6.5451258 Debye                                         | EE + Thermal Energy Correction = -1500.9857 Hartree      |
| Polarizability (?) = 490.518 a.u.                                       | EE + Thermal Enthalpy Correction = -1500.9847 Hartree    |
| Point Group = C1                                                        | EE + Thermal Free Energy Correction = -1501.0766 Hartree |
| Molecular Mass = 455.13822 amu                                          | E (Thermal) = 262.408 kcal/mol                           |
|                                                                         | Heat Capacity (Cv) = 105.274 cal/mol-kelvin              |
|                                                                         | Entropy (S) = 193.446 cal/mol-kelvin                     |
| Maximum force = 0 Converged                                             |                                                          |
| RMS force = 0 Converged                                                 |                                                          |
| Maximum displacement = 3.3e-05 Converged                                |                                                          |
| RMS displacement = 8e-06 Converged                                      |                                                          |
| Predicted energy change = -2.182248e-12 Hartree                         |                                                          |

**Table S10** Results summary for structure optimisation and frequency calculation of **L<sup>PhthH</sup>**

|                                                                         |                                                          |
|-------------------------------------------------------------------------|----------------------------------------------------------|
| Calculation Type = FREQ                                                 | Imaginary Freq = 0                                       |
| Calculation Method = RB3LYP                                             | Temperature = 298.15 Kelvin                              |
| Formula = C <sub>28</sub> H <sub>18</sub> N <sub>5</sub> O <sub>2</sub> | Pressure = 1 atm                                         |
| Basis Set = 6-31G(d)                                                    | Frequencies scaled by = 1                                |
| Charge = 1                                                              | Electronic Energy (EE) = -1501.8375 Hartree              |
| Spin = Singlet                                                          | Zero-point Energy Correction = 0.405281 Hartree          |
| Solvation = scrf=solvent=dms0                                           | Thermal Correction to Energy = 0.432242 Hartree          |
| E(RB3LYP) = -1501.8375 Hartree                                          | Thermal Correction to Enthalpy = 0.433187 Hartree        |
| RMS Gradient Norm = 1.829e-06 Hartree/Bohr                              | Thermal Correction to Free Energy = 0.342008 Hartree     |
| Imaginary Freq = 0                                                      | EE + Zero-point Energy = -1501.4322 Hartree              |
| Dipole Moment = 13.385819 Debye                                         | EE + Thermal Energy Correction = -1501.4052 Hartree      |
| Polarizability (?) = 495.71333 a.u.                                     | EE + Thermal Enthalpy Correction = -1501.4043 Hartree    |
| Point Group = C1                                                        | EE + Thermal Free Energy Correction = -1501.4955 Hartree |
| Molecular Mass = 456.14605 amu                                          | E (Thermal) = 271.236 kcal/mol                           |
|                                                                         | Heat Capacity (Cv) = 105.931 cal/mol-kelvin              |
|                                                                         | Entropy (S) = 191.901 cal/mol-kelvin                     |
| Maximum force = 0 Converged                                             |                                                          |
| RMS force = 0 Converged                                                 |                                                          |
| Maximum displacement = 0.000134 Not converged                           |                                                          |
| RMS displacement = 2.5e-05 Converged                                    |                                                          |
| Predicted energy change = -5.341069e-12 Hartree                         |                                                          |

## X-ray Crystallography

Crystals of  $[\text{Pd}_2(\text{L}^{\text{Bu}})_4](\text{BF}_4)_4$  were grown by vapour diffusion of  ${}^i\text{Pr}_2\text{O}$  into a DMF solution of the compound. Data were collected at 173 K using an Agilent Xcalibur 3 E diffractometer. Cell determination, data collection, data reduction, cell refinement and absorption correction were performed with CrysAlisPro.<sup>[7]</sup> The structure was solved using SHELXT<sup>[8]</sup> within WINGX and refined against  $F_2$  using anisotropic thermal displacement parameters for all non-hydrogen atoms, except for one DMF and one  ${}^i\text{Pr}_2\text{O}$  molecule, using SHELXL-2017/1<sup>[9]</sup> within WINGX<sup>[10]</sup>. Hydrogen atoms were placed in calculated positions and refined using a riding model.

|                                      |                                                                                                                                                          |                       |
|--------------------------------------|----------------------------------------------------------------------------------------------------------------------------------------------------------|-----------------------|
| CCDC                                 | 2043240                                                                                                                                                  |                       |
| Empirical formula                    | $[\text{Pd}_2(\text{C}_{23}\text{H}_{20}\text{N}_4)_4](\text{BF}_4)_4 \cdot (\text{C}_3\text{H}_7\text{NO})_4 \cdot (\text{C}_6\text{H}_{14}\text{O})_2$ |                       |
| Formula weight                       | 2466.48                                                                                                                                                  |                       |
| Temperature                          | 173(2) K                                                                                                                                                 |                       |
| Wavelength                           | 0.71073 Å                                                                                                                                                |                       |
| Crystal system                       | Monoclinic                                                                                                                                               |                       |
| Space group                          | $P 2_1/n$                                                                                                                                                |                       |
| Unit cell dimensions                 | $a = 13.4683(3)$ Å                                                                                                                                       | $a = 90^\circ$        |
|                                      | $b = 18.1293(4)$ Å                                                                                                                                       | $b = 99.400(2)^\circ$ |
|                                      | $c = 24.7113(5)$ Å                                                                                                                                       | $g = 90^\circ$        |
| Volume                               | $5952.8(2)$ Å <sup>3</sup>                                                                                                                               |                       |
| Z                                    | 2                                                                                                                                                        |                       |
| Density (calculated)                 | 1.376 Mg/m <sup>3</sup>                                                                                                                                  |                       |
| Absorption coefficient               | 0.389 mm <sup>-1</sup>                                                                                                                                   |                       |
| F(000)                               | 2552                                                                                                                                                     |                       |
| Crystal size                         | $0.484 \times 0.182 \times 0.145$ mm <sup>3</sup>                                                                                                        |                       |
| Theta range for data collection      | 2.359 to 28.334°.                                                                                                                                        |                       |
| Index ranges                         | $-16 \leq h \leq 14, -21 \leq k \leq 16, -32 \leq l \leq 31$                                                                                             |                       |
| Reflections collected                | 33881                                                                                                                                                    |                       |
| Independent reflections              | 12454 [R(int) = 0.0322]                                                                                                                                  |                       |
| Completeness to theta = 25.242°      | 99.7%                                                                                                                                                    |                       |
| Absorption correction                | Semi-empirical from equivalents                                                                                                                          |                       |
| Max. and min. transmission           | 1.000 and 0.94338                                                                                                                                        |                       |
| Refinement method                    | Full-matrix least-squares on $F^2$                                                                                                                       |                       |
| Data / restraints / parameters       | 12454 / 0 / 689                                                                                                                                          |                       |
| Goodness-of-fit on $F^2$             | 1.032                                                                                                                                                    |                       |
| Final R indices [ $I > 2\sigma(I)$ ] | $R_1 = 0.0752, wR_2 = 0.2057$                                                                                                                            |                       |
| R indices (all data)                 | $R_1 = 0.1046, wR_2 = 0.2361$                                                                                                                            |                       |
| Largest diff. peak and hole          | 1.859 and -0.998 e.Å <sup>-3</sup>                                                                                                                       |                       |

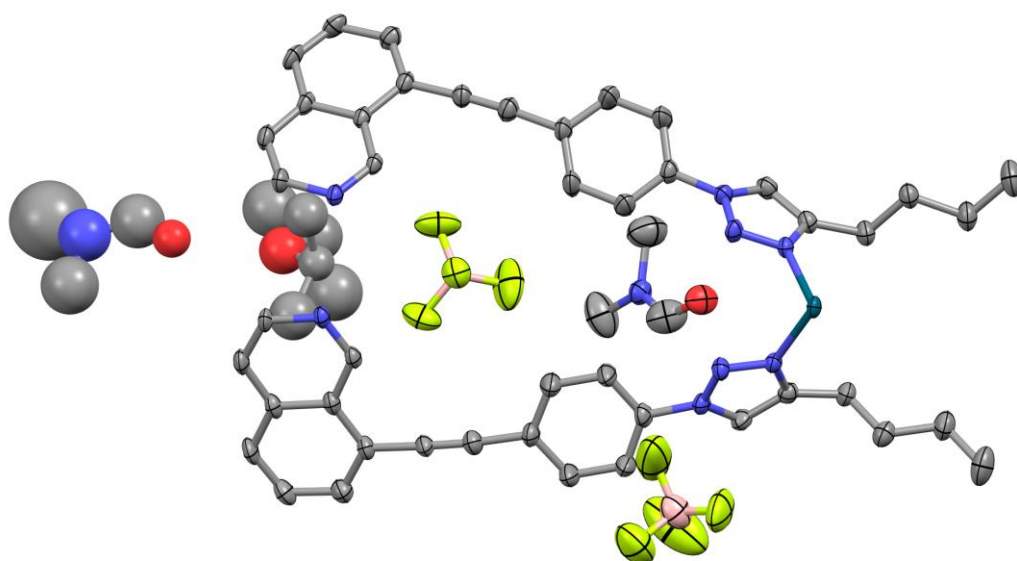

**Figure S129** Ellipsoid plot of the asymmetric unit of  $[\text{Pd}_2(\text{L}^{\text{Bu}})_4](\text{BF}_4)_4 \cdot (\text{C}_3\text{H}_7\text{NO})_4 \cdot (\text{C}_6\text{H}_{14}\text{O})_2$ . Ellipsoids shown at 50% probability. Hydrogen atoms omitted for clarity.

Crystals of  $[\text{Pd}(\mathbf{1})_4](\text{BF}_4)_2$  were grown by vapour diffusion of  $\text{Et}_2\text{O}$  into a DMF solution of the compound. Data were collected at 173 K using an Agilent Xcalibur 3 E diffractometer. Cell determination, data collection, data reduction, cell refinement and absorption correction were performed with CrysAlisPro.<sup>[7]</sup> The structure was solved using SHELXT<sup>[8]</sup> within Olex2<sup>[11]</sup> and refined against  $F_2$  using anisotropic thermal displacement parameters for all non-hydrogen atoms using SHELXL-2018/3<sup>[9]</sup> within Olex2. Disordered  $\text{BF}_4$  counteranions and solvent molecules could not be appropriately modelled; electron density was accounted for using a mask. Hydrogen atoms were placed in calculated positions and refined using a riding model.

|                                        |                                                                                                               |                |
|----------------------------------------|---------------------------------------------------------------------------------------------------------------|----------------|
| CCDC                                   | 2050421                                                                                                       |                |
| Empirical formula                      | $[\text{Pd}(\text{C}_{17}\text{H}_{10}\text{N}_4)_4](\text{BF}_4)_2 \cdot 4(\text{C}_4\text{H}_{10}\text{O})$ |                |
| Formula weight                         | 1657.66                                                                                                       |                |
| Temperature                            | 173.00(14) K                                                                                                  |                |
| Wavelength                             | 0.71073 Å                                                                                                     |                |
| Crystal system                         | Tetragonal                                                                                                    |                |
| Space group                            | $I 4/m$                                                                                                       |                |
| Unit cell dimensions                   | $a = 14.1424(3)$ Å                                                                                            | $a = 90^\circ$ |
|                                        | $b = 14.1424(3)$ Å                                                                                            | $b = 90^\circ$ |
|                                        | $c = 36.1928(11)$ Å                                                                                           | $g = 90^\circ$ |
| Volume                                 | $7238.8(4)$ Å <sup>3</sup>                                                                                    |                |
| Z                                      | 4                                                                                                             |                |
| Density (calculated)                   | $1.521$ Mg/m <sup>3</sup>                                                                                     |                |
| Absorption coefficient                 | $0.345$ mm <sup>-1</sup>                                                                                      |                |
| F(000)                                 | 3424                                                                                                          |                |
| Crystal size                           | $0.286 \times 0.214 \times 0.073$ mm <sup>3</sup>                                                             |                |
| Theta range for data collection        | $2.251$ to $28.223^\circ$ .                                                                                   |                |
| Index ranges                           | $-13 \leq h \leq 15$ , $-10 \leq k \leq 18$ , $-45 \leq l \leq 47$                                            |                |
| Reflections collected                  | 12412                                                                                                         |                |
| Independent reflections                | 3912 [R(int) = 0.0315]                                                                                        |                |
| Completeness to theta = $25.242^\circ$ | 99.6%                                                                                                         |                |
| Absorption correction                  | Semi-empirical from equivalents                                                                               |                |
| Max. and min. transmission             | 1.000 and 0.79900                                                                                             |                |
| Refinement method                      | Full-matrix least-squares on $F^2$                                                                            |                |
| Data / restraints / parameters         | 3912 / 0 / 193                                                                                                |                |
| Goodness-of-fit on $F^2$               | 1.077                                                                                                         |                |
| Final R indices [ $l > 2\sigma(l)$ ]   | $R_1 = 0.0469$ , $wR_2 = 0.1270$                                                                              |                |
| R indices (all data)                   | $R_1 = 0.0655$ , $wR_2 = 0.1424$                                                                              |                |
| Largest diff. peak and hole            | $0.94$ and $-0.36$ e.Å <sup>-3</sup>                                                                          |                |

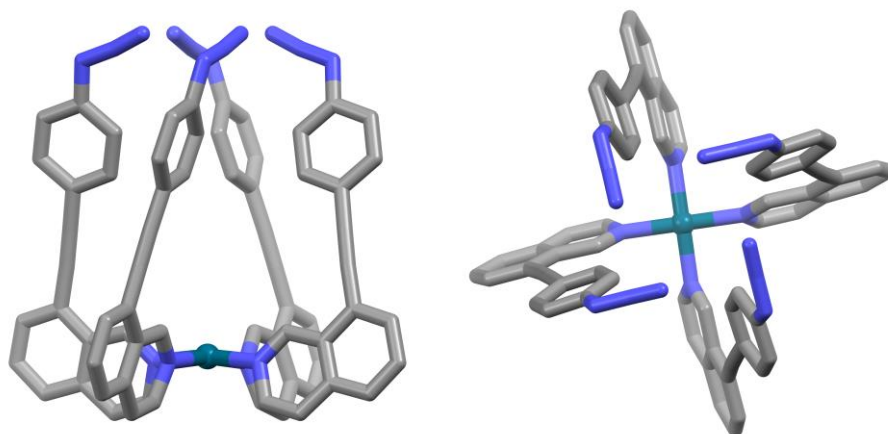

**Figure S130** Stick representation of the SCXRD structure of  $[\text{Pd}(\mathbf{1})_4](\text{BF}_4)_2$  shown from the side (left) and the top (right).

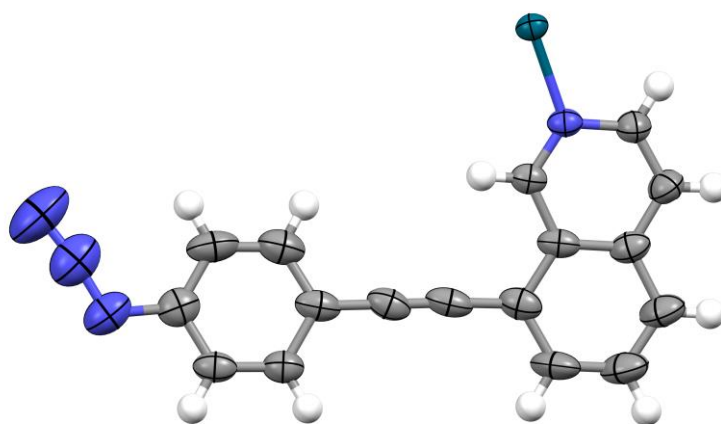

**Figure S131** Ellipsoid plot of the asymmetric unit of  $[\text{Pd}(\mathbf{1})_4](\text{BF}_4)_2 \cdot 4(\text{C}_4\text{H}_{10}\text{O})$ . Ellipsoids shown at 50% probability.

## References

- [1] N. Guven and P. Camurlu, *Polymer*, 2015, **73**, 122-130.
- [2] M. D. Hanwell, D. E. Curtis, D. C. Lonie, T. Vandermeersch, E. Zurek and G. R. Hutchinson, *J. Cheminform.*, 2012, **4**, 17.
- [3] A. K. Rappé, C. J. Casewit, K. S. Colwell, W. A. Goddard III and W. M. Skiff, *J. Am. Chem. Soc.*, 1992, **114**, 10024-10035.
- [4] J. J. P. Stewart, *J. Mol. Model.*, 2007, **13**, 1173-1213.
- [5] Gaussian 16, Revision C.01, M. J. Frisch, G. W. Trucks, H. B. Schlegel, G. E. Scuseria, M. A. Robb, J. R. Cheeseman, G. Scalmani, V. Barone, G. A. Petersson, H. Nakatsuji, X. Li, M. Caricato, A. V. Marenich, J. Bloino, B. G. Janesko, R. Gomperts, B. Mennucci, H. P. Hratchian, J. V. Ortiz, A. F. Izmaylov, J. L. Sonnenberg, D. Williams-Young, F. Ding, F. Lipparini, F. Egidi, J. Goings, B. Peng, A. Petrone, T. Henderson, D. Ranasinghe, V. G. Zakrzewski, J. Gao, N. Rega, G. Zheng, W. Liang, M. Hada, M. Ehara, K. Toyota, R. Fukuda, J. Hasegawa, M. Ishida, T. Nakajima, Y. Honda, O. Kitao, H. Nakai, T. Vreven, K. Throssell, J. A. Montgomery, Jr., J. E. Peralta, F. Ogliaro, M. J. Bearpark, J. J. Heyd, E. N. Brothers, K. N. Kudin, V. N. Staroverov, T. A. Keith, R. Kobayashi, J. Normand, K. Raghavachari, A. P. Rendell, J. C. Burant, S. S. Iyengar, J. Tomasi, M. Cossi, J. M. Millam, M. Klene, C. Adamo, R. Cammi, J. W. Ochterski, R. L. Martin, K. Morokuma, O. Farkas, J. B. Foresman, and D. J. Fox, Gaussian, Inc., Wallingford CT, 2016.
- [6] M. Holz, X. Mao, D. Seiferling and A. Sacco, *J. Chem. Phys.*, 1996, **104**, 669-679.
- [7] *CrysAlis Pro*, Rigaku Oxford Diffraction, Yarnton, Oxfordshire, England, **2015**.
- [8] G. M. Sheldrick, *Acta Cryst.*, 2015, **A71**, 3-8.
- [9] G. M. Sheldrick, *Acta Cryst.*, 2015, **C71**, 3-8.
- [10] L. J. Farrugia, *J. Appl. Crystallogr.*, 2012, **45**, 849-854.
- [11] O. V. Dolomanov, L. J. Bourhis, R. J. Gildea, J. A. Howard and H. Puschmann, *J. Appl. Crystallogr.*, 2009, **42**, 339-341.
